# Supplementary material for: Development and application of Single Primer Enrichment Technology (SPET) SNP assay for population genomics analysis and candidate gene discovery in lettuce
Source: Front Plant Sci. 2023 Aug 18;14:1252777. doi: 10.3389/fpls.2023.1252777 (PMC10471991; doi:10.3389/fpls.2023.1252777)
Supplement: Supplementary file 2 [file Table_1.xlsx]

## Sheet: Table S1
Supplementary Table 1. List and details of the accessions studied
Accession code	Accession number	Accession name	Species	Country of origin	Genebank*	Biological Status	Cultivar Type	Subtaxa
EVA_Lsa_00051	1984-LAC-SA-37	SN 31	Lactuca sativa	BGR (Bulgaria)	BGR001	400 (Breeding/research material)	Iceberg
EVA_Lsa_00052	1984-LAC-SA-32	SN 52	Lactuca sativa	BGR (Bulgaria)	BGR001	400 (Breeding/research material)	Iceberg
EVA_Lsa_00053	1981-LAC-SA-42	Zhulta krasavitsa	Lactuca sativa	BGR (Bulgaria)	BGR001	300 (Traditional cultivar/landrace)	Cos
EVA_Lsa_00054	1984-LAC-SA-33	SN 85	Lactuca sativa	BGR (Bulgaria)	BGR001	400 (Breeding/research material)	Iceberg
EVA_Lsa_00055	1984-LAC-SA-34	SN 03	Lactuca sativa	BGR (Bulgaria)	BGR001	400 (Breeding/research material)	Iceberg
EVA_Lsa_00056	1984-LAC-SA-35	SN 305	Lactuca sativa	BGR (Bulgaria)	BGR001	400 (Breeding/research material)	Iceberg
EVA_Lsa_00057	1984-LAC-SA-36	SN 205	Lactuca sativa	BGR (Bulgaria)	BGR001	400 (Breeding/research material)	Iceberg
EVA_Lsa_00058	1985-LAC-SA-25	SN 18	Lactuca sativa	BGR (Bulgaria)	BGR001	400 (Breeding/research material)	Iceberg
EVA_Lsa_00059	1985-LAC-SA-24	SN 23	Lactuca sativa	BGR (Bulgaria)	BGR001	400 (Breeding/research material)	Iceberg
EVA_Lsa_00060	1985-LAC-SA-23	SN 27	Lactuca sativa	BGR (Bulgaria)	BGR001	400 (Breeding/research material)	Iceberg
EVA_Lsa_00061	1985-LAC-SA-22	SN 32	Lactuca sativa	BGR (Bulgaria)	BGR001	400 (Breeding/research material)	Iceberg
EVA_Lsa_00063	1985-LAC-SA-12	SN 37 cerni	Lactuca sativa	BGR (Bulgaria)	BGR001	400 (Breeding/research material)	Iceberg
EVA_Lsa_00064	1985-LAC-SA-19	SN 41 beli	Lactuca sativa	BGR (Bulgaria)	BGR001	400 (Breeding/research material)	Iceberg
EVA_Lsa_00065	1985-LAC-SA-26	SN 55	Lactuca sativa	BGR (Bulgaria)	BGR001	400 (Breeding/research material)	Iceberg
EVA_Lsa_00066	1985-LAC-SA-17	SN 58	Lactuca sativa	BGR (Bulgaria)	BGR001	400 (Breeding/research material)	Iceberg
EVA_Lsa_00067	1985-LAC-SA-16	SN 60	Lactuca sativa	BGR (Bulgaria)	BGR001	400 (Breeding/research material)	Iceberg
EVA_Lsa_00068	1985-LAC-SA-15	SN 75 cerni	Lactuca sativa	BGR (Bulgaria)	BGR001	400 (Breeding/research material)	Iceberg
EVA_Lsa_00069	1985-LAC-SA-14	SN 87	Lactuca sativa	BGR (Bulgaria)	BGR001	400 (Breeding/research material)	Iceberg
EVA_Lsa_00070	1985-LAC-SA-13	SN 204	Lactuca sativa	BGR (Bulgaria)	BGR001	400 (Breeding/research material)	Iceberg
EVA_Lsa_00071	1985-LAC-SA-31	SN 222 b	Lactuca sativa	BGR (Bulgaria)	BGR001	400 (Breeding/research material)	Iceberg
EVA_Lsa_00072	1985-LAC-SA-18	SN 84	Lactuca sativa	BGR (Bulgaria)	BGR001	400 (Breeding/research material)	Iceberg
EVA_Lsa_00073	1985-LAC-SA-33	SN 227	Lactuca sativa	BGR (Bulgaria)	BGR001	400 (Breeding/research material)	Iceberg
EVA_Lsa_00074	1985-LAC-SA-20	SN 403	Lactuca sativa	BGR (Bulgaria)	BGR001	400 (Breeding/research material)	Iceberg
EVA_Lsa_00075	1985-LAC-SA-40	SN 405	Lactuca sativa	BGR (Bulgaria)	BGR001	400 (Breeding/research material)	Iceberg
EVA_Lsa_00076	1985-LAC-SA-39	SN 408	Lactuca sativa	BGR (Bulgaria)	BGR001	400 (Breeding/research material)	Iceberg
EVA_Lsa_00077	1985-LAC-SA-38	SN 409	Lactuca sativa	BGR (Bulgaria)	BGR001	400 (Breeding/research material)	Iceberg
EVA_Lsa_00079	1985-LAC-SA-36	SN 417	Lactuca sativa	BGR (Bulgaria)	BGR001	400 (Breeding/research material)	Iceberg
EVA_Lsa_00080	1985-LAC-SA-35	SN 418	Lactuca sativa	BGR (Bulgaria)	BGR001	400 (Breeding/research material)	Iceberg
EVA_Lsa_00081	1985-LAC-SA-34	SN 420	Lactuca sativa	BGR (Bulgaria)	BGR001	400 (Breeding/research material)	Iceberg
EVA_Lsa_00084	1988-LAC-SA-157	Zimna maslena glava	Lactuca sativa	BGR (Bulgaria)	BGR001	300 (Traditional cultivar/landrace)	Butterhead	convar. incocta var. capitata
EVA_Lsa_00085	1985-LAC-SA-28	SN 12 - 79	Lactuca sativa	BGR (Bulgaria)	BGR001	400 (Breeding/research material)	Iceberg
EVA_Lsa_00086	1981-LAC-SA-34	SN 44	Lactuca sativa	BGR (Bulgaria)	BGR001	400 (Breeding/research material)	Iceberg
EVA_Lsa_00088	1981-LAC-SA-36	SN 221 - 4	Lactuca sativa	BGR (Bulgaria)	BGR001	500 (Advanced or improved cultivar (conventional breeding methods))	Iceberg
EVA_Lsa_00091	1981-LAC-SA-39	SN 41 - 4	Lactuca sativa	BGR (Bulgaria)	BGR001	400 (Breeding/research material)	Iceberg
EVA_Lsa_00092	1981-LAC-SA-41	SN 43	Lactuca sativa	BGR (Bulgaria)	BGR001	400 (Breeding/research material)	Iceberg
EVA_Lsa_00094	1988-LAC-SA-164	SN 422	Lactuca sativa	BGR (Bulgaria)	BGR001	300 (Traditional cultivar/landrace)	Cos	var. romana
EVA_Lsa_00095	1988-LAC-SA-165	SN 421	Lactuca sativa	BGR (Bulgaria)	BGR001	300 (Traditional cultivar/landrace)	Cos	var. romana
EVA_Lsa_00096	1990-LAC-SA-32	Junska edra	Lactuca sativa	BGR (Bulgaria)	BGR001	500 (Advanced or improved cultivar (conventional breeding methods))	Butterhead
EVA_Lsa_00097	1990-LAC-SA-34	N -14	Lactuca sativa	BGR (Bulgaria)	BGR001	400 (Breeding/research material)	Iceberg
EVA_Lsa_00098	1989-LAC-SA-121	Lactuca sativa	Lactuca sativa	BGR (Bulgaria)	BGR001	300 (Traditional cultivar/landrace)	Cos
EVA_Lsa_00099	1989-LAC-SA-113	Lactuca sativa	Lactuca sativa	RUS (Russian Federation)	BGR001	300 (Traditional cultivar/landrace)	Cos
EVA_Lsa_00101	1990-LAC-SA-21	SN 411	Lactuca sativa	BGR (Bulgaria)	BGR001	400 (Breeding/research material)	Iceberg
EVA_Lsa_00102	1990-LAC-SA-26	SN 406	Lactuca sativa	BGR (Bulgaria)	BGR001	400 (Breeding/research material)	Iceberg
EVA_Lsa_00103	1990-LAC-SA-30	SN 41	Lactuca sativa	BGR (Bulgaria)	BGR001	400 (Breeding/research material)	Iceberg
EVA_Lsa_00104	1990-LAC-SA-6	SN 504	Lactuca sativa	BGR (Bulgaria)	BGR001	400 (Breeding/research material)	Iceberg
EVA_Lsa_00105	1990-LAC-SA-10	SN 47	Lactuca sativa	BGR (Bulgaria)	BGR001	400 (Breeding/research material)	Iceberg
EVA_Lsa_00106	1990-LAC-SA-16	SN 753	Lactuca sativa	BGR (Bulgaria)	BGR001	400 (Breeding/research material)	Iceberg
EVA_Lsa_00107	1990-LAC-SA-22	SN 304	Lactuca sativa	BGR (Bulgaria)	BGR001	400 (Breeding/research material)	Iceberg
EVA_Lsa_00108	1990-LAC-SA-29	SN 509	Lactuca sativa	BGR (Bulgaria)	BGR001	400 (Breeding/research material)	Iceberg
EVA_Lsa_00110	1990-LAC-SA-19	SN 404	Lactuca sativa	BGR (Bulgaria)	BGR001	400 (Breeding/research material)	Iceberg
EVA_Lsa_00111	1990-LAC-SA-18	SN 401	Lactuca sativa	BGR (Bulgaria)	BGR001	400 (Breeding/research material)	Iceberg
EVA_Lsa_00112	1988-LAC-SA-156	Zhalta Gyumerdzhinska	Lactuca sativa	BGR (Bulgaria)	BGR001	300 (Traditional cultivar/landrace)	Cos	var. romana
EVA_Lsa_00113	1988-LAC-SA-158	Cherna Gyumerdzhinska	Lactuca sativa	BGR (Bulgaria)	BGR001	300 (Traditional cultivar/landrace)	Cos	var. romana
EVA_Lsa_00114	2007-LAC-SA-1	Ira	Lactuca sativa	BGR (Bulgaria)	BGR001	500 (Advanced or improved cultivar (conventional breeding methods))	Iceberg
EVA_Lsa_00115	2014-LAC-SA-6	Lactuca sativa	Lactuca sativa	BGR (Bulgaria)	BGR001	300 (Traditional cultivar/landrace)	Cos
EVA_Lsa_00116	1979-LAC-SA-1	Lactuca sativa	Lactuca sativa	BGR (Bulgaria)	BGR001	300 (Traditional cultivar/landrace)	Cos
EVA_Lsa_00118	CGN04508	Avoncrisp	Lactuca sativa	GBR (United Kingdom)	NLD037	500 (Advanced or improved cultivar (conventional breeding methods))	Crisp	group Crisp Lettuce
EVA_Lsa_00120	CGN04536	Brune d'Hiver	Lactuca sativa	FRA (France)	NLD037	500 (Advanced or improved cultivar (conventional breeding methods))	Butterhead	group Butterhead Lettuce
EVA_Lsa_00121	CGN04542	Calicel	Lactuca sativa	USA (United States)	NLD037	500 (Advanced or improved cultivar (conventional breeding methods))	Crisp	group Crisp Lettuce
EVA_Lsa_00122	CGN04581	Frisee de Beauregard	Lactuca sativa	FRA (France)	NLD037	500 (Advanced or improved cultivar (conventional breeding methods))	Crisp	group Crisp Lettuce
EVA_Lsa_00123	CGN04647	Laibacher Eis	Lactuca sativa	AUT (Austria)	NLD037	500 (Advanced or improved cultivar (conventional breeding methods))	Crisp	group Crisp Lettuce
EVA_Lsa_00128	CGN05201	Larganda	Lactuca sativa	NLD (Netherlands)	NLD037	500 (Advanced or improved cultivar (conventional breeding methods))	Butterhead	group Butterhead Lettuce
EVA_Lsa_00129	CGN05813	Dandie	Lactuca sativa	GBR (United Kingdom)	NLD037	500 (Advanced or improved cultivar (conventional breeding methods))	Butterhead	group Butterhead Lettuce
EVA_Lsa_00132	CGN06012	Ostinata	Lactuca sativa	NLD (Netherlands)	NLD037	500 (Advanced or improved cultivar (conventional breeding methods))	Butterhead	group Butterhead Lettuce
EVA_Lsa_00133	CGN09341	Tom Thumb	Lactuca sativa	GBR (United Kingdom)	NLD037	500 (Advanced or improved cultivar (conventional breeding methods))	Butterhead	group Butterhead Lettuce
EVA_Lsa_00134	CGN09380	Sabine	Lactuca sativa	NLD (Netherlands)	NLD037	500 (Advanced or improved cultivar (conventional breeding methods))	Butterhead	group Butterhead Lettuce
EVA_Lsa_00136	CGN11338	UCDM2	Lactuca sativa	USA (United States)	NLD037	400 (Breeding/research material)	Butterhead	group Butterhead Lettuce
EVA_Lsa_00137	CGN11340	UCDM14	Lactuca sativa	USA (United States)	NLD037	400 (Breeding/research material)	Butterhead	group Butterhead Lettuce
EVA_Lsa_00138	CGN11364	Kinemontepas	Lactuca sativa	FRA (France)	NLD037	500 (Advanced or improved cultivar (conventional breeding methods))	Butterhead	group Butterhead Lettuce
EVA_Lsa_00139	CGN11374	Tina	Lactuca sativa	NLD (Netherlands)	NLD037	500 (Advanced or improved cultivar (conventional breeding methods))	Butterhead	group Butterhead Lettuce
EVA_Lsa_00140	CGN11379	Virex	Lactuca sativa	NLD (Netherlands)	NLD037	500 (Advanced or improved cultivar (conventional breeding methods))	Butterhead	group Butterhead Lettuce
EVA_Lsa_00141	CGN11403	Line 4/57/D	Lactuca sativa	GBR (United Kingdom)	NLD037	400 (Breeding/research material)	Butterhead	group Butterhead Lettuce
EVA_Lsa_00143	CGN13320	Salinas 88	Lactuca sativa	USA (United States)	NLD037	500 (Advanced or improved cultivar (conventional breeding methods))	Crisp	group Crisp Lettuce
EVA_Lsa_00144	CGN14626	Augusta	Lactuca sativa	FRA (France)	NLD037	500 (Advanced or improved cultivar (conventional breeding methods))	Butterhead	group Butterhead Lettuce
EVA_Lsa_00145	CGN14640	Diana	Lactuca sativa	GBR (United Kingdom)	NLD037	500 (Advanced or improved cultivar (conventional breeding methods))	Butterhead	group Butterhead Lettuce
EVA_Lsa_00146	CGN20139	Titan	Lactuca sativa	NLD (Netherlands)	NLD037	500 (Advanced or improved cultivar (conventional breeding methods))	Butterhead	group Butterhead Lettuce
EVA_Lsa_00147	CGN20716	Ninja	Lactuca sativa	NLD (Netherlands)	NLD037	500 (Advanced or improved cultivar (conventional breeding methods))	Butterhead	group Butterhead Lettuce
EVA_Lsa_00148	CGN24530	Discovery	Lactuca sativa	NLD (Netherlands)	NLD037	500 (Advanced or improved cultivar (conventional breeding methods))	Butterhead	group Butterhead Lettuce
EVA_Lsa_00149	CGN24542	Libusa	Lactuca sativa	NLD (Netherlands)	NLD037	500 (Advanced or improved cultivar (conventional breeding methods))	Butterhead	group Butterhead Lettuce
EVA_Lsa_00150	CGN24676	Argeles	Lactuca sativa	FRA (France)	NLD037	500 (Advanced or improved cultivar (conventional breeding methods))	Crisp	group Crisp Lettuce
EVA_Lsa_00151	CGN25281	Salinas	Lactuca sativa	USA (United States)	NLD037	500 (Advanced or improved cultivar (conventional breeding methods))	Crisp	group Crisp Lettuce
EVA_Lsa_00152	CGN25449	HILDE II	Lactuca sativa	NLD (Netherlands)	NLD037	400 (Breeding/research material)	Butterhead	group Butterhead Lettuce
EVA_Lsa_00153	LC0016	Americana bruna	Lactuca sativa	FRA (France)	FRA011	300 (Traditional cultivar/landrace)	Loose leaf	f. Laitue à couper
EVA_Lsa_00154	LC0023	Anthelmette	Lactuca sativa	FRA (France)	FRA011	300 (Traditional cultivar/landrace)	Butterhead	f. Laitue pommée gr. Laitue beurre
EVA_Lsa_00155	LC0033	Argelès	Lactuca sativa	FRA (France)	FRA011	nd	Batavia
EVA_Lsa_00156	LC0047	Averya	Lactuca sativa	FRA (France)	FRA011	500 (Advanced or improved cultivar (conventional breeding methods))	Butterhead	f. Laitue pommée gr. Laitue beurre
EVA_Lsa_00157	LC0062	Barba dei frati	Lactuca sativa	ITA (Italy)	FRA011	300 (Traditional cultivar/landrace)	Loose leaf	f. Laitue à couper
EVA_Lsa_00158	LC0075	Biscia rossa	Lactuca sativa	FRA (France)	FRA011	500 (Advanced or improved cultivar (conventional breeding methods))	Loose leaf	f. Laitue à couper
EVA_Lsa_00159	LC0078	Blonde à bord rouge	Lactuca sativa	FRA (France)	FRA011	300 (Traditional cultivar/landrace)	Batavia	f. Laitue pommée gr. Batavia sgr. Batavia européenne
EVA_Lsa_00160	LC0079	Blonde de Doulon	Lactuca sativa	FRA (France)	FRA011	300 (Traditional cultivar/landrace)	Butterhead	f. Laitue pommée gr. Laitue beurre
EVA_Lsa_00161	LC0080	Blonde de St Etienne	Lactuca sativa	FRA (France)	FRA011	300 (Traditional cultivar/landrace)	Batavia	f. Laitue pommée gr. Batavia sgr. Batavia européenne
EVA_Lsa_00163	LC0090	Bourguignonne 2	Lactuca sativa	FRA (France)	FRA011	nd	Butterhead
EVA_Lsa_00166	LC0152	Craquante d'Eculy	Lactuca sativa	FRA (France)	FRA011	nd	Batavia
EVA_Lsa_00167	LC0179	Dorée de printemps	Lactuca sativa	FRA (France)	FRA011	nd	Batavia
EVA_Lsa_00169	LC0193	Estelle	Lactuca sativa	FRA (France)	FRA011	500 (Advanced or improved cultivar (conventional breeding methods))	Butterhead	f. Laitue pommée gr. Laitue beurre
EVA_Lsa_00170	LC0205	Feuille de chêne blonde	Lactuca sativa	FRA (France)	FRA011	300 (Traditional cultivar/landrace)	Oak leaf	f. Laitue à couper gr. Feuille de chêne
EVA_Lsa_00171	LC0206	Feuille de chêne espagnole	Lactuca sativa	FRA (France)	FRA011	nd	Loose leaf
EVA_Lsa_00173	LC0215	Floresta	Lactuca sativa	FRA (France)	FRA011	500 (Advanced or improved cultivar (conventional breeding methods))	Butterhead	f. Laitue pommée gr. Laitue beurre
EVA_Lsa_00174	LC0224	Feuille de chêne rouge récente	Lactuca sativa	FRA (France)	FRA011	500 (Advanced or improved cultivar (conventional breeding methods))	Oak leaf	f. Laitue à couper gr. Feuille de chêne
EVA_Lsa_00175	LC0225	Frisée blonde du V.A.C	Lactuca sativa	FRA (France)	FRA011	nd	Loose leaf
EVA_Lsa_00176	LC0226	Frisée d'Amérique	Lactuca sativa	FRA (France)	FRA011	300 (Traditional cultivar/landrace)	Loose leaf	f. Laitue à couper
EVA_Lsa_00177	LC0227	Frisée d'Australie	Lactuca sativa	FRA (France)	FRA011	nd	Batavia
EVA_Lsa_00178	LC0233	Girelle	Lactuca sativa	FRA (France)	FRA011	nd	Butterhead
EVA_Lsa_00179	LC0237	Gloire de Nantes	Lactuca sativa	FRA (France)	FRA011	300 (Traditional cultivar/landrace)	Butterhead	f. Laitue pommée gr. Laitue beurre
EVA_Lsa_00180	LC0238	Gloire du Dauphiné	Lactuca sativa	FRA (France)	FRA011	300 (Traditional cultivar/landrace)	Batavia	f. Laitue pommée gr. Batavia sgr. Batavia européenne
EVA_Lsa_00181	LC0239	Gotte à Chassis	Lactuca sativa	FRA (France)	FRA011	nd	Butterhead
EVA_Lsa_00182	LC0240	Gotte à graines blanches	Lactuca sativa	FRA (France)	FRA011	nd	Butterhead
EVA_Lsa_00183	LC0241	Gotte de Loos	Lactuca sativa	FRA (France)	FRA011	300 (Traditional cultivar/landrace)	Butterhead	f. Laitue pommée gr. Laitue beurre
EVA_Lsa_00184	LC0244	Grassoise	Lactuca sativa	FRA (France)	FRA011	300 (Traditional cultivar/landrace)	Latin	f. Laitue pommée
EVA_Lsa_00185	LC0250	Grosse blonde paresseuse	Lactuca sativa	FRA (France)	FRA011	300 (Traditional cultivar/landrace)	Butterhead	f. Laitue pommée gr. Laitue beurre
EVA_Lsa_00186	LC0266	Illera	Lactuca sativa	FRA (France)	FRA011	nd	Butterhead
EVA_Lsa_00187	LC0279	Jessy	Lactuca sativa	FRA (France)	FRA011	500 (Advanced or improved cultivar (conventional breeding methods))	Butterhead	f. Laitue pommée gr. Laitue beurre
EVA_Lsa_00188	LC0284	Jory	Lactuca sativa	FRA (France)	FRA011	nd	Butterhead
EVA_Lsa_00189	LC0286	Judy	Lactuca sativa	FRA (France)	FRA011	nd	Butterhead
EVA_Lsa_00190	LC0297	Kinemontepas 2	Lactuca sativa	FRA (France)	FRA011	nd	Butterhead
EVA_Lsa_00191	LC0313	Lattuga da taglio bianca	Lactuca sativa	ITA (Italy)	FRA011	nd	Loose leaf
EVA_Lsa_00192	LC0314	Lattuga di Trento	Lactuca sativa	ITA (Italy)	FRA011	nd	Batavia
EVA_Lsa_00193	LC0315	Lattuga foglia di quercia	Lactuca sativa	ITA (Italy)	FRA011	300 (Traditional cultivar/landrace)	Oak leaf	f. Laitue à couper gr. Feuille de chêne
EVA_Lsa_00194	LC0316	Lattuga rosa	Lactuca sativa	ITA (Italy)	FRA011	300 (Traditional cultivar/landrace)	Oak leaf	f. Laitue à couper gr. Feuille de chêne
EVA_Lsa_00195	LC0321	Lilloise à graine blanche	Lactuca sativa	FRA (France)	FRA011	nd	Butterhead
EVA_Lsa_00196	LC0329	Lollo bionda	Lactuca sativa	ITA (Italy)	FRA011	300 (Traditional cultivar/landrace)	Lollo	f. Laitue à couper gr. Lollo
EVA_Lsa_00197	LC0362	Mélina	Lactuca sativa	FRA (France)	FRA011	nd	Butterhead
EVA_Lsa_00198	LC0366	Merveille d'hiver	Lactuca sativa	FRA (France)	FRA011	300 (Traditional cultivar/landrace)	Butterhead	f. Laitue pommée gr. Laitue beurre
EVA_Lsa_00199	LC0377	Monstrueuse ronde d'été	Lactuca sativa	FRA (France)	FRA011	500 (Advanced or improved cultivar (conventional breeding methods))	Butterhead	f. Laitue pommée gr. Laitue beurre
EVA_Lsa_00200	LC0394	Ninja	Lactuca sativa	FRA (France)	FRA011	nd	Butterhead
EVA_Lsa_00201	LC0403	Novir	Lactuca sativa	FRA (France)	FRA011	500 (Advanced or improved cultivar (conventional breeding methods))	Butterhead	f. Laitue pommée gr. Laitue beurre
EVA_Lsa_00202	LC0415	Ondine	Lactuca sativa	FRA (France)	FRA011	500 (Advanced or improved cultivar (conventional breeding methods))	Batavia	f. Laitue pommée gr. Batavia sgr. Batavia européenne
EVA_Lsa_00203	LC0429	Parris Island Cos	Lactuca sativa	FRA (France)	FRA011	500 (Advanced or improved cultivar (conventional breeding methods))	Cos	f. Laitue pommée gr. Romaine/grasse sgr. Romaine
EVA_Lsa_00204	LC0430	Passion blonde à graine blanche	Lactuca sativa	FRA (France)	FRA011	300 (Traditional cultivar/landrace)	Butterhead	f. Laitue pommée gr. Laitue beurre
EVA_Lsa_00205	LC0431	Patience	Lactuca sativa	FRA (France)	FRA011	300 (Traditional cultivar/landrace)	Butterhead	f. Laitue pommée gr. Laitue beurre
EVA_Lsa_00206	LC0461	Radichetta	Lactuca sativa	ITA (Italy)	FRA011	500 (Advanced or improved cultivar (conventional breeding methods))	Loose leaf	f. Laitue à couper
EVA_Lsa_00207	LC0462	Radichetta o catalogna	Lactuca sativa	ITA (Italy)	FRA011	500 (Advanced or improved cultivar (conventional breeding methods))	Loose leaf	f. Laitue à couper
EVA_Lsa_00208	LC0468	Ravel	Lactuca sativa	FRA (France)	FRA011	500 (Advanced or improved cultivar (conventional breeding methods))	Butterhead	f. Laitue pommée gr. Laitue beurre
EVA_Lsa_00209	LC0485	Romana a costa rosata	Lactuca sativa	ITA (Italy)	FRA011	nd	Cos
EVA_Lsa_00210	LC0486	Romana lent siura a monture	Lactuca sativa	ITA (Italy)	FRA011	300 (Traditional cultivar/landrace)	Cos	f. Laitue pommée gr. Romaine/grasse sgr. Romaine
EVA_Lsa_00211	LC0495	Rouge de bult	Lactuca sativa	FRA (France)	FRA011	nd	Batavia
EVA_Lsa_00212	LC0497	Rougette du Midi à graine noire	Lactuca sativa	FRA (France)	FRA011	300 (Traditional cultivar/landrace)	Latin	f. Laitue pommée gr. Romaine/grasse
EVA_Lsa_00213	LC0545	Sucrine	Lactuca sativa	FRA (France)	FRA011	300 (Traditional cultivar/landrace)	Latin	f. Laitue pommée gr. Romaine/grasse
EVA_Lsa_00214	LC0577	Trocadéro à graine noire	Lactuca sativa	FRA (France)	FRA011	300 (Traditional cultivar/landrace)	Butterhead	f. Laitue pommée gr. Laitue beurre
EVA_Lsa_00215	LC0588	Val d'orge	Lactuca sativa	FRA (France)	FRA011	nd	Butterhead
EVA_Lsa_00216	LC0692	Lilloise 2	Lactuca sativa	FRA (France)	FRA011	nd	Butterhead
EVA_Lsa_00217	LC0701	Grosse blonde d'hiver bourguignonne	Lactuca sativa	FRA (France)	FRA011	nd	Butterhead
EVA_Lsa_00218	LC0702	Lorthois	Lactuca sativa	FRA (France)	FRA011	nd	Butterhead
EVA_Lsa_00219	NGB 11771	Lactuca sativa	Lactuca sativa	SWE (Sweden)	SWE054	500 (Advanced or improved cultivar (conventional breeding methods))	Butterhead
EVA_Lsa_00220	NGB 4102	Korona	Lactuca sativa	DNK (Denmark)	SWE054	500 (Advanced or improved cultivar (conventional breeding methods))	Butterhead
EVA_Lsa_00222	2019-LAC-SA-2	L. sativa convar incocta	Lactuca sativa	BGR (Bulgaria)	BGR001	300 (Traditional cultivar/landrace)	Crisp	convar. incocta Helm var. crispa L.
EVA_Lsa_00223	2019-LAC-SA-3	L. sativa var. longifolia	Lactuca sativa	BGR (Bulgaria)	BGR001	300 (Traditional cultivar/landrace)	Cos	convar. sativa var. longifolia Lam.
EVA_Lsa_00224	2019-LAC-SA-4	L. sativa convar incocta	Lactuca sativa	BGR (Bulgaria)	BGR001	300 (Traditional cultivar/landrace)	Crisp	convar. incocta Helm var. crispa L.
EVA_Lsa_00225	2019-LAC-SA-5	L. sativa var. longifolia	Lactuca sativa	BGR (Bulgaria)	BGR001	300 (Traditional cultivar/landrace)	Cos	convar. sativa var. longifolia Lam.
EVA_Lsa_00226	2019-LAC-SA-6	L. sativa var. longifolia	Lactuca sativa	BGR (Bulgaria)	BGR001	300 (Traditional cultivar/landrace)	Cos	convar. sativa var. longifolia Lam.
EVA_Lsa_00227	2019-LAC-SA-7	L. sativa convar incocta	Lactuca sativa	BGR (Bulgaria)	BGR001	300 (Traditional cultivar/landrace)	Crisp	convar. incocta Helm var. crispa L.
EVA_Lsa_00228	2019-LAC-SA-8	L. sativa var. longifolia	Lactuca sativa	BGR (Bulgaria)	BGR001	300 (Traditional cultivar/landrace)	Cos	convar. sativa var. longifolia Lam.
EVA_Lsa_C0001	Ithaca		Lactuca sativa	nd		nd	Iceberg
EVA_Lsa_C0002	Grand Rapids		Lactuca sativa	nd		nd	Batavia
EVA_Lsa_C0003	Green towers		Lactuca sativa	nd		nd	Cos
EVA_Lse_00017	NGB 24495	HAGA, ENKÖPING 13608	Lactuca serriola	SWE (Sweden)	SWE054	100 (Wild)
EVA_Lse_00026	NGB 22617	KÖPINGEBRO KO20010905	Lactuca serriola	SWE (Sweden)	SWE054	100 (Wild)
EVA_Lse_00033	NGB 24535	LUND, DALBYVÄGEN 13548	Lactuca serriola	SWE (Sweden)	SWE054	100 (Wild)
EVA_Lse_00035	NGB 24536	MALMÖ MUSEUM 13560	Lactuca serriola	SWE (Sweden)	SWE054	100 (Wild)
EVA_Lse_00049	NGB 24484	VÄ 13655	Lactuca serriola	SWE (Sweden)	SWE054	100 (Wild)
* BGR001 = Institute for Plant Genetic Resources 'K.Malkov', Sadovo, Plovdiv district, Bulgaria; FRA011 = Unité de Génétique et Amélioration des Fruits et Légumes, Plant Biology and Breeding, INRAe Avignon, Montfavet Cedex, France; NLD037 = Centre for Genetic Resources, the Netherlands, Wageningen, Netherlands; SWE054 = Nordic Genetic Resource Center, Alnarp, Sweden
nd = not determined

## Sheet: Table S2
Supplementary Table 2: Resequenced Lactuca sativa accessions selected for SPET probe design (Table modified from Wei et al 2021, https://doi.org/10.1038/s41588-021-00831-0)
Accession code	Provenance	Cultivar type	Global Information system DOI
TKI-001	NL	Butterhead	10.18730/182F6
TKI-002	FR	Butterhead	10.18730/17W0N
TKI-003	FR	Butterhead	10.18730/17W6V
TKI-004	FR	Butterhead	10.18730/17WR8
TKI-006	BE	Butterhead	10.18730/17XH~
TKI-007	NL	Butterhead	10.18730/18AD1
TKI-008	DE	Butterhead	10.18730/188SQ
TKI-009	FR	Butterhead	10.18730/17YT0
TKI-011	FR	Butterhead	10.18730/17ZCJ
TKI-013	FR	Butterhead	10.18730/17ZMT
TKI-014	US	Butterhead	10.18730/180RS
TKI-016	NL	Butterhead	10.18730/180VW
TKI-017	NL	Butterhead	10.18730/17FM*
TKI-019	FR	Butterhead	10.18730/17WD$
TKI-020	NL	Butterhead	10.18730/17FCR
TKI-021	FR	Butterhead	10.18730/17VZM
TKI-022	NL	Butterhead	10.18730/17G07
TKI-023	DK	Butterhead	10.18730/17ZV~
TKI-024	NL	Butterhead	10.18730/17H35
TKI-025	NL	Butterhead	10.18730/18290
TKI-026	UK	Butterhead	10.18730/17WFU
TKI-027	SE	Butterhead	10.18730/18CT4
TKI-028	SE	Butterhead	10.18730/18CW6
TKI-029	DE	Butterhead	10.18730/18BT9
TKI-030	FR	Butterhead	10.18730/1AGKV
TKI-031	NL	Butterhead	10.18730/1AGMW
TKI-032	FR	Butterhead	10.18730/17VYK
TKI-033	na	Butterhead	10.18730/17YHW
TKI-034	UY	Butterhead	10.18730/17ZRY
TKI-035	UK	Butterhead	10.18730/18023
TKI-036	NL	Butterhead	10.18730/1BSWG
TKI-037	RS	Butterhead	10.18730/1AKQG
TKI-038	FR	Butterhead	10.18730/1BT0M
TKI-039	NL	Butterhead	10.18730/1BVP0
TKI-040	NL	Butterhead	10.18730/1BVZ9
TKI-041	NL	Butterhead	10.18730/1BWTU
TKI-042	na	Butterhead	10.18730/1BSRC
TKI-043	na	Butterhead	10.18730/1BSTE
TKI-044	NL	Butterhead	10.18730/1BTM3
TKI-045	FR	Butterhead	10.18730/1BV1G
TKI-046	NL	Butterhead	10.18730/1BVNU
TKI-047	NL	Butterhead	10.18730/1BVY8
TKI-048	UK	Butterhead	10.18730/1BWS=
TKI-049	CZ	Butterhead	10.18730/1CRQ4
TKI-050	FR	Butterhead	10.18730/1CRZC
TKI-051	DE	Butterhead	10.18730/1CRAW
TKI-053	FR	Butterhead	10.18730/1E25=
TKI-054	NL	Butterhead	10.18730/1E2C5
TKI-055	UK	Butterhead	10.18730/1E49X
TKI-056	FR	Butterhead	10.18730/1H1CB
TKI-057	NL	Butterhead	10.18730/1E2E7
TKI-058	US	Butterhead	10.18730/1E5V5
TKI-059	HR	Butterhead	10.18730/1H176
TKI-062	DE	Butterhead	10.18730/1JHV8
TKI-063	NL	Butterhead	10.18730/1NSFZ
TKI-064	NL	Butterhead	10.18730/1PB33
TKI-065	NL	Butterhead	10.18730/10Z7Q
TKI-066	NL	Butterhead	10.18730/10ZQ2
TKI-067	NL	Butterhead	10.18730/1100B
TKI-068	US	Crisp	10.18730/182G7
TKI-069	UK	Crisp	10.18730/18DQ~
TKI-070	US	Crisp	10.18730/1832S
TKI-071	FR	Crisp	10.18730/183B$
TKI-072	AT	Crisp	10.18730/1843N
TKI-073	US	Crisp	10.18730/184E*
TKI-074	US	Crisp	10.18730/184K0
TKI-075	US	Crisp	10.18730/183M6
TKI-076	AR	Crisp	10.18730/182SG
TKI-077	FR	Crisp	10.18730/182TH
TKI-078	US	Crisp	10.18730/183F1
TKI-079	US	Crisp	10.18730/184N2
TKI-080	US	Crisp	10.18730/184AW
TKI-081	FR	Crisp	10.18730/1BT5S
TKI-082	CN	Crisp	10.18730/1BX49
TKI-083	US	Crisp	10.18730/1CV36
TKI-084	FR	Crisp	10.18730/1E4GU
TKI-085	NL	Crisp	10.18730/1H3PB
TKI-086	SI	Crisp	10.18730/1H154
TKI-087	FR	Crisp	10.18730/1JF2Y
TKI-088	FR	Crisp	10.18730/10YP6
TKI-089	FR	Crisp	10.18730/1107J
TKI-090	NL	Crisp	10.18730/116AW
TKI-091	NL	Crisp	10.18730/116JU
TKI-092	na	Crisp	10.18730/JDX79
TKI-093	NL	Latin	10.18730/1AGR*
TKI-094	FR	Latin	10.18730/1BSA=
TKI-095	na	Latin	10.18730/1BSSD
TKI-096	SY	Latin	10.18730/1DH9D
TKI-097	NL	Latin	10.18730/10XG5
TKI-098	US	Cos	10.18730/185HY
TKI-099	TR	Cos	10.18730/18714
TKI-100	SY	Cos	10.18730/18736
TKI-101	IR	Cos	10.18730/187FJ
TKI-102	FR	Cos	10.18730/185Y6
TKI-103	FR	Cos	10.18730/1866E
TKI-104	AT	Cos	10.18730/186T$
TKI-105	BG	Cos	10.18730/18BXC
TKI-106	FR	Cos	10.18730/1864C
TKI-107	US	Cos	10.18730/186R*
TKI-108	SP	Cos	10.18730/186MW
TKI-109	EG	Cos	10.18730/1AGDN
TKI-110	AT	Cos	10.18730/1AMPA
TKI-111	FR	Cos	10.18730/1BS7*
TKI-112	na	Cos	10.18730/1BSXH
TKI-113	NL	Cos	10.18730/1E4YD
TKI-114	US	Cos	10.18730/1E5Q1
TKI-115	FR	Cos	10.18730/1M930
TKI-116	NL	Cos	10.18730/10XD2
TKI-117	US	Cos	10.18730/1102D
TKI-118	DE	Cutting	10.18730/188TR
TKI-119	TR	Cutting	10.18730/189SJ
TKI-120	UK	Cutting	10.18730/1841K
TKI-121	US	Cutting	10.18730/18992
TKI-122	na	Cutting	10.18730/188A8
TKI-123	IT	Cutting	10.18730/1BVGZ
TKI-124	CN	Cutting	10.18730/1BW4E
TKI-125	FR	Cutting	10.18730/1CXJB
TKI-126	CA	Cutting	10.18730/1CXKC
TKI-127	SY	Cutting	10.18730/18D4E
TKI-128	CN	Cutting	10.18730/1CWZX
TKI-129	CN	Cutting	10.18730/1CX3~
TKI-130	NL	Cutting	10.18730/1E1DB
TKI-131	PT	Cutting	10.18730/1H46V
TKI-132	DE	Cutting	10.18730/1JHXA
TKI-134	NL	Cutting	10.18730/114VJ
TKI-135	NL	Cutting	10.18730/116F~
TKI-136	CN	Stalk	10.18730/18D1B
TKI-137	CN	Stalk	10.18730/18A0S
TKI-138	CN	Stalk	10.18730/1AM9$
TKI-139	EG	Oilseed	10.18730/18B8W
TKI-495	na	Butterhead	10.18730/JE8P6
na = not available

## Sheet: Table S3
Supplementary Table 3: Details of 41,547 SPET probes with sequences and their orientation on genome reference, position on lettuce chromosomes, genotyping region (the regions where SNP calling was enabled in the genotyping procedure: 460bp downstream of a 40bp probes, probe excluded), target site position and genomic region (L. sativa cv Salinas V8).
Chromosome	Probe sequence	Strand	Probe Position		Genotyping region		Target site		Genomic region
			Start	End	Start	End	Start	End
chr1	GATAAATCTCGTGGACCTGATGGCTATTCGGCTAAGTTTT	+	45165	45204	45205	45665	45228	45229	Pper_target_1_intergenic_0_24146952
chr1	CACCGGACCCAAAGCCCTCCAGGACTATGAGCTTCTTGAC	+	79740	79779	79780	80240	79802	79803	Pper_target_2_genes_0_24146953
chr1	ATGGCCTTAAGACGAGCAAGGGAGCCAAAAAGAGAATACC	-	86062	86101	85602	86062	86049	86050	Pper_target_3_genes_0_24146954
chr1	GCCACAATAATTTTTTGTATTGTGGTGAATAAAAAATACC	+	165088	165127	165128	165588	165145	165146	Pper_target_5_genes_0_24146956
chr1	ACTGTAGTAATCATAGTTGCATCTATAAGGTACAACTTAC	+	170988	171027	171028	171488	171045	171046	Pper_target_6_genes_0_24146957
chr1	ATGGCACTTAATACTGTTATTTCAGACATTAGCGACAAAA	+	523357	523396	523397	523857	523397	523398	Pper_target_8_intergenic_0_24146959
chr1	TATTGATTCTTCAAAATCTCATAACTACGTGTCACAAATC	+	527540	527579	527580	528040	527600	527601	Pper_target_9_genes_0_24146960
chr1	AGAATGTTGATCCTAATTTTTGAAGTGACCCTCGTAGTTC	+	813962	814001	814002	814462	814019	814020	Pper_target_11_genes_0_24146962
chr1	GGGATTAATTGAAGGAATGTCCACATAAGTGATTGTAATG	+	824390	824429	824430	824890	824444	824445	Pper_target_12_genes_0_24146963
chr1	TTTTTATTTATTTATTTATGGTTAGCTGAATCTTTTGTGC	+	860703	860742	860743	861203	860744	860745	Pper_target_13_genes_0_24146964
chr1	AGAGGTTTAAATTCAAAAAGGGCAGACACCGAAACCCTTC	+	954898	954937	954938	955398	954959	954960	Pper_target_14_genes_0_24146965
chr1	TTTCTTCTTATTATTATGAAATGCTTTACAATACAAATTG	+	962126	962165	962166	962626	962181	962182	Pper_target_15_genes_0_24146966
chr1	ACTGGTCTAGCGAAACAAGATTCGGCTTACCAATGGACTC	+	983541	983580	983581	984041	983587	983588	Pper_target_16_genes_0_24146967
chr1	TGTTTTTTCGGAATTTATTTTGTTTTTAATGTTTATCTTG	+	1040521	1040560	1040561	1041021	1040582	1040583	Pper_target_17_genes_0_24146968
chr1	AAAAAAATTTACATACCACTACGTACCACATCAAAAGAAC	+	1113537	1113576	1113577	1114037	1113590	1113591	Pper_target_18_genes_0_24146969
chr1	TGAAAATGATTCTCAATTTCATTCACAGTAGCTAGTATTC	+	1243506	1243545	1243546	1244006	1243561	1243562	Pper_target_19_genes_0_24146970
chr1	TCCCATATGCATTGGTATCCTCACGTATCGAGTCACTAGG	+	1246993	1247032	1247033	1247493	1247051	1247052	Pper_target_20_genes_0_24146971
chr1	ATTTCCATCTTCCATTTTACATAGAAAATTAAGTTTCATC	+	1480483	1480522	1480523	1480983	1480536	1480537	Pper_target_22_genes_0_24146973
chr1	TGGTTATGAAAAACAAAGAGAAAATTGTAGAGCAGCAATC	+	1533426	1533465	1533466	1533926	1533488	1533489	Pper_target_23_genes_0_24146974
chr1	ACCTGTTGAGTGCATTTTAAAAACAGGATACAAGAAAGAC	+	1540559	1540598	1540599	1541059	1540620	1540621	Pper_target_24_genes_0_24146975
chr1	AAAAAAGTGTGATATTTCCGGCTGCACCTCGCATCTATTT	+	1553933	1553972	1553973	1554433	1553981	1553982	Pper_target_25_genes_0_24146976
chr1	GCTATGAAATTCGGTACTCATATTCTTAGAAGAGTTCTGG	+	1576598	1576637	1576638	1577098	1576652	1576653	Pper_target_26_genes_0_24146977
chr1	TCATGTGGGGCCCACTTGTTTAGCTGTAAGTAAACTTTTT	+	1606538	1606577	1606578	1607038	1606578	1606579	Pper_target_27_genes_0_24146978
chr1	GCGCCTCTCAGCCACACCTTCAAATGCGGTGTCCTAGGTG	-	1728841	1728880	1728381	1728841	1728818	1728819	Pper_target_28_genes_0_24146979
chr1	GATCATGTATTATGTATTTGTTAGTCACTTCTTCCTCTGT	+	1736215	1736254	1736255	1736715	1736279	1736280	Pper_target_30_genes_0_24146981
chr1	CATAAAAAAATTGTTAGGTTAATTCAAAAAATTATGGTAC	+	1775976	1776015	1776016	1776476	1776023	1776024	Pper_target_31_genes_0_24146982
chr1	AACACCCATAAAATTCGAGCCAATTTAAAAACCTTCAAAA	+	1925570	1925609	1925610	1926070	1925619	1925620	Pper_target_33_genes_0_24146984
chr1	GGACCGTAGTGCAAAAACCGCCCTTCAATTTCACATCGAG	+	1948525	1948564	1948565	1949025	1948583	1948584	Pper_target_34_genes_0_24146985
chr1	GAGGCACAAACTAGCAGGTAGAGCCAGCCAGTTGTTGGTG	+	1956064	1956103	1956104	1956564	1956117	1956118	Pper_target_35_genes_0_24146986
chr1	AAAAACTAAAAACTGTTTGTGTTTCAGCTTCTGAACTTGT	+	1959384	1959423	1959424	1959884	1959436	1959437	Pper_target_36_genes_0_24146987
chr1	TACTGCAAAAATAGCATCAACAGTTTCTGATGAGCACAAG	+	2002266	2002305	2002306	2002766	2002308	2002309	Pper_target_37_genes_0_24146988
chr1	ATATCTTTACAAATCAACAAAGTAGTTTGGGGAATGCTTG	+	2006986	2007025	2007026	2007486	2007044	2007045	Pper_target_38_genes_0_24146989
chr1	TTCTTCCAAATAACGATGCAGCCGCCCTTTCCTCCAATTA	+	2146696	2146735	2146736	2147196	2146739	2146740	Pper_target_39_genes_0_24146990
chr1	TTACTTATTTTTAACAACTGCATGTTTGTTTCTAAATTGG	+	2154625	2154664	2154665	2155125	2154680	2154681	Pper_target_40_genes_0_24146991
chr1	AATGAAGTAACAAATGCAAAGAAAAACAACAAATGGAAGG	+	2162930	2162969	2162970	2163430	2162994	2162995	Pper_target_41_genes_0_24146992
chr1	TTCATAAAATACATCCAAGTCAAAACCATTTGTTCAAGAC	+	2169279	2169318	2169319	2169779	2169333	2169334	Pper_target_42_genes_0_24146993
chr1	ACGACAACAATGCCCAACCACGAACCGACAGGATAATGTG	+	2197639	2197678	2197679	2198139	2197683	2197684	Pper_target_44_genes_0_24146995
chr1	TTCCAAAGAAAGACTCTGGCTTAAGATGTGTTATTCTAAA	-	2200722	2200761	2200262	2200722	2200719	2200720	Pper_target_45_genes_0_24146996
chr1	AACCTCGAGAAGGAACAGTACTCACGGTTGCTCAACAGAC	+	2203715	2203754	2203755	2204215	2203755	2203756	Pper_target_46_genes_0_24146997
chr1	CAAGACACTGCCGGGGTAAGTATGTGCCAAAAGAAGTATG	+	2206809	2206848	2206849	2207309	2206858	2206859	Pper_target_47_genes_0_24146998
chr1	CCGGGTTCTGGTATATCCTGAGAAAACAAAAATAAACATC	+	2210156	2210195	2210196	2210656	2210213	2210214	Pper_target_48_genes_0_24146999
chr1	CGACACATATAGAGTTGAATCTTGTTGACAGGTTCTTACC	+	2213187	2213226	2213227	2213687	2213237	2213238	Pper_target_49_genes_0_24147000
chr1	TTGTTACTTCAAAGTCTACATTTTTATCTAAGTTTGTTTC	+	2216377	2216416	2216417	2216877	2216440	2216441	Pper_target_50_genes_0_24147001
chr1	CCATACGTACATACCAAAACCAATTGCCAATTGGCATTTG	+	2219408	2219447	2219448	2219908	2219465	2219466	Pper_target_51_genes_0_24147002
chr1	AATTAAAACACTATATAACAGTGAAAAGGATGTGATCAAG	+	2222991	2223030	2223031	2223491	2223047	2223048	Pper_target_52_genes_0_24147003
chr1	TTGGCACAACGCGTGGTGGTGGGACAAAAGCAAACAGCAC	+	2228285	2228324	2228325	2228785	2228336	2228337	Pper_target_53_genes_0_24147004
chr1	ATATTTTACATTTTACATATTTGTACCTTGTTTTCGATTC	+	2231718	2231757	2231758	2232218	2231768	2231769	Pper_target_54_genes_0_24147005
chr1	TTTTTTTGTAATTAGCATTCCATTATATTTTATAAAAATG	-	2234824	2234863	2234364	2234824	2234809	2234810	Pper_target_55_genes_0_24147006
chr1	CATTAGATATAGTACTTCTTTTACCTTGATTTCGTGTTTT	-	2273998	2274037	2273538	2273998	2273971	2273972	Pper_target_56_genes_0_24147007
chr1	AGAACACAAATTTGGTTCTATAAAATTTTCTTTCCTTACC	+	2277908	2277947	2277948	2278408	2277962	2277963	Pper_target_57_genes_0_24147008
chr1	ATAATAATTACATTATTATTTATTACTCATTTGTTCTATT	+	2369852	2369891	2369892	2370352	2369898	2369899	Pper_target_59_genes_0_24147010
chr1	CATGGCTACTTCTTTTGAGAATGGCAGCAATGGTGTATCC	+	2373364	2373403	2373404	2373864	2373408	2373409	Pper_target_60_genes_0_24147011
chr1	GAACTTATTTTTCCTTTTTCATGACATAAAGAAATAATTG	+	2453000	2453039	2453040	2453500	2453049	2453050	Pper_target_62_genes_0_24147013
chr1	TCAAGATTTGTTTTTGAACCAAAGACAATTCAAAGAATGG	+	2456115	2456154	2456155	2456615	2456164	2456165	Pper_target_63_genes_0_24147014
chr1	GCCGAGTAGAGGATTTAATGGCCGAGTGGTTTTTAGAGTC	-	2526999	2527038	2526539	2526999	2526979	2526980	Pper_target_64_genes_0_24147015
chr1	TTTATTAAATAATATCTCAATGTAACTGAAATTGGACTTG	+	2530387	2530426	2530427	2530887	2530441	2530442	Pper_target_65_genes_0_24147016
chr1	AAAGCTTGTAGAATAAGGAAAAAAATATAATAAATATACA	+	2625879	2625918	2625919	2626379	2625934	2625935	Pper_target_66_genes_0_24147017
chr1	GGAGATCAATCGATTTGGGTAACAGGTTTTCTCTCTAATG	+	2703337	2703376	2703377	2703837	2703377	2703378	Pper_target_67_genes_0_24147018
chr1	TTAATGGTGGTGTTTTCTAGTGGACAAATTGCGTTTAATG	+	2707264	2707303	2707304	2707764	2707323	2707324	Pper_target_68_genes_0_24147019
chr1	CAGTCATTGATGAGCAAATCGTAAGAAATTTTAGGTGTTC	+	2711052	2711091	2711092	2711552	2711094	2711095	Pper_target_69_genes_0_24147020
chr1	CAATTCCCACCTTAGGCAATAAGAAGTATTTTGTTATATT	+	2714098	2714137	2714138	2714598	2714150	2714151	Pper_target_70_genes_0_24147021
chr1	TTTTGTTTTCCCCTAACAAATTTACTAATATCATCTCTCC	+	2718180	2718219	2718220	2718680	2718226	2718227	Pper_target_71_genes_0_24147022
chr1	AAAGCCGAGTCATACAAAGCCTGTAACTGGTGCCTGAGTC	+	2801073	2801112	2801113	2801573	2801137	2801138	Pper_target_73_genes_0_24147024
chr1	GTCGCTTGATTCCCGCCTGCTCACAAAAGAACTGGAATTG	+	2911380	2911419	2911420	2911880	2911443	2911444	Pper_target_74_genes_0_24147025
chr1	TATTTTTTCATAAAAACATGAAAAAACGGTCCGGACAAAG	+	2917422	2917461	2917462	2917922	2917463	2917464	Pper_target_75_genes_0_24147026
chr1	TAGAGATTTGGGGTATGATAGCACTTGGAATTCTGAAAAC	+	2921197	2921236	2921237	2921697	2921243	2921244	Pper_target_76_genes_0_24147027
chr1	GTCTACATACACCGATGTAATCATTCTCGCAACATCTATC	+	2958391	2958430	2958431	2958891	2958439	2958440	Pper_target_77_genes_0_24147028
chr1	ATCATTTGATGACCTCGCAGCAGCTGTATACATCGGTTGC	+	2961858	2961897	2961898	2962358	2961917	2961918	Pper_target_78_genes_0_24147029
chr1	TGTCGGACCAACAACCAAAGATTTATCAGTGTGACTCAGC	-	2965806	2965845	2965346	2965806	2965791	2965792	Pper_target_79_genes_0_24147030
chr1	TGACAGCTGGGAAACGGCATGCTTGCCGGAATCGGTGATG	+	2998069	2998108	2998109	2998569	2998118	2998119	Pper_target_80_genes_0_24147031
chr1	TGAAATTGCGAATTAGTATGTGAAACTGTTATATGTATTC	+	3001081	3001120	3001121	3001581	3001133	3001134	Pper_target_81_genes_0_24147032
chr1	GTGGAAGTTTTTCGTAGGGATGAGGATACAGATGAGGAAG	+	3004159	3004198	3004199	3004659	3004223	3004224	Pper_target_82_genes_0_24147033
chr1	CAATAAAACGTATAGATAAAAAAATAAATTAACTAGGTGC	+	3049123	3049162	3049163	3049623	3049182	3049183	Pper_target_83_genes_0_24147034
chr1	TTGTTCCAACTTTTCTACTTTAAAGCCTACTTTTTATTTC	+	3052575	3052614	3052615	3053075	3052632	3052633	Pper_target_84_genes_0_24147035
chr1	AATTAGTTTTCCATTATTTTATAAGTCTGTTTATTGTGTG	+	3055620	3055659	3055660	3056120	3055664	3055665	Pper_target_85_genes_0_24147036
chr1	TGTGATTCTTGTCGTATGGATAAATTATTGATTATGATTC	+	3096859	3096898	3096899	3097359	3096913	3096914	Pper_target_86_genes_0_24147037
chr1	GATTAGTTTTAACAATATTCATCAACTTTTTACACGAGAG	+	3100215	3100254	3100255	3100715	3100270	3100271	Pper_target_87_genes_0_24147038
chr1	AGAAGAAAACAAGTGAAGAACATTATAAATGTATGTCAAC	+	3110983	3111022	3111023	3111483	3111038	3111039	Pper_target_89_genes_0_24147040
chr1	TTAAGAAACTTACTTAGTACTTCCTCGGCTGATATTCTGG	+	3114072	3114111	3114112	3114572	3114136	3114137	Pper_target_90_genes_0_24147041
chr1	GTATTTTGTGATCAGGTTATAATCCTCAAGGTTGTGTTTG	+	3120894	3120933	3120934	3121394	3120941	3120942	Pper_target_91_genes_0_24147042
chr1	TTGTTTTTTTAAAGGTTACTAGATTGTCTTTGTTTTTAGT	+	3128461	3128500	3128501	3128961	3128504	3128505	Pper_target_93_genes_0_24147044
chr1	ACGAATTATATATACATGTTTTAAAACATTCACATAATAT	+	3225560	3225599	3225600	3226060	3225634	3225635	Pper_target_94_genes_0_24147045
chr1	CGTCGGTTACTTCTACATGGCGGCATTCTTCTGCAATAGG	+	3228634	3228673	3228674	3229134	3228680	3228681	Pper_target_95_genes_0_24147046
chr1	AAAGTCGTTGTTGGCTATCATCCCTACCGTACAAAATAAG	+	3330843	3330882	3330883	3331343	3330896	3330897	Pper_target_97_genes_0_24147048
chr1	GTGCCAACTCCATTGATTGTTGAGTAGATTGTGTGTTATC	+	3364319	3364358	3364359	3364819	3364375	3364376	Pper_target_99_genes_0_24147050
chr1	CCAAAAAACTTTTATTTTTTGGTAATAAATATCGTAATCG	+	3367888	3367927	3367928	3368388	3367977	3367978	Pper_target_100_genes_0_24147051
chr1	AATTCAAGATTAAAAGCGTCTTCTTTGCCGCAGGGCTAAC	+	3371294	3371333	3371334	3371794	3371356	3371357	Pper_target_101_genes_0_24147052
chr1	CATTCATCAGGACAACCAGCCCAGTCTACATCTGAAAAAG	+	3374492	3374531	3374532	3374992	3374537	3374538	Pper_target_102_genes_0_24147053
chr1	ACATGTCATAGTTATCCAACTTAAAATCTATATCATAACC	+	3451960	3451999	3452000	3452460	3452009	3452010	Pper_target_104_genes_0_24147055
chr1	AAGAAAAATATAAAAATAACCATCGCTGTTAAGGGGGTAG	+	3455568	3455607	3455608	3456068	3455628	3455629	Pper_target_105_genes_0_24147056
chr1	ACGATGCAAACACAGGATTCACCGGTAACTGTGTGTAAAC	+	3566433	3566472	3566473	3566933	3566490	3566491	Pper_target_106_genes_0_24147057
chr1	TTCAAACTACTTTCCTTTGTATTTGAGGCATTGGAGCTTG	+	3569996	3570035	3570036	3570496	3570057	3570058	Pper_target_107_genes_0_24147058
chr1	CCTCTTTTTAACTAAAGTTTACTTTCCATTTATTAAAAAA	+	3573631	3573670	3573671	3574131	3573690	3573691	Pper_target_108_genes_0_24147059
chr1	TCTTTGATAGTAACCCGCCCGACCATGGAAACTCTAAATC	-	3579578	3579617	3579118	3579578	3579553	3579554	Pper_target_109_genes_0_24147060
chr1	CAGGCTTTGAGGATTGAAGAGTATGTATAGGAATAAAATG	+	3614009	3614048	3614049	3614509	3614058	3614059	Pper_target_110_genes_0_24147061
chr1	ATAATTGTTTATAGTTACCTGGTTAAAATCTCTTCTGAAC	+	3618026	3618065	3618066	3618526	3618083	3618084	Pper_target_111_genes_0_24147062
chr1	CTCGACGTTCCCGAGATGAACGCACGACATTCTCGACCAA	-	3622742	3622781	3622282	3622742	3622728	3622729	Pper_target_112_genes_0_24147063
chr1	TAACCCAATAGAATAAGAAACCTTCAACATTTGACCACAG	+	3625873	3625912	3625913	3626373	3625935	3625936	Pper_target_113_genes_0_24147064
chr1	GGCACTCTGATCACTTCCAGCAGCCAATTAGATCGTAGAG	+	3637904	3637943	3637944	3638404	3637954	3637955	Pper_target_114_genes_0_24147065
chr1	CCGCCGGAACACCATCTCCACCACCTACTCCTCCTTCTGG	+	3643382	3643421	3643422	3643882	3643424	3643425	Pper_target_115_genes_0_24147066
chr1	TCGCCGATTAAGTCTGGCTTTAGCAAGGATTTTTAGAAGG	-	3669451	3669490	3668991	3669451	3669445	3669446	Pper_target_116_genes_0_24147067
chr1	AGCTCGACCTCGCGATTATTATGTACGTATTAAAACTTAC	+	3674118	3674157	3674158	3674618	3674177	3674178	Pper_target_117_genes_0_24147068
chr1	GCCAAACTTTGACATGTTTAAACGGTGTGTGTTTCGAGTT	+	3677143	3677182	3677183	3677643	3677202	3677203	Pper_target_118_genes_0_24147069
chr1	TCTTACTTTAAAAGTTATCTCTATCGTTTCTCTTGCTTCC	+	3706909	3706948	3706949	3707409	3706955	3706956	Pper_target_119_genes_0_24147070
chr1	AATGTTATTACATGTTTTTTCGTATGATTAATATAAAAAG	+	3710204	3710243	3710244	3710704	3710251	3710252	Pper_target_120_genes_0_24147071
chr1	AACAGTAGTACCATAACCATGCTTGAAGATGCCATTGTTG	+	3743611	3743650	3743651	3744111	3743675	3743676	Pper_target_122_genes_0_24147073
chr1	CAAAAAATTGGTAGAAAGAAGACAACGGGACATGCCAGAC	+	3777050	3777089	3777090	3777550	3777100	3777101	Pper_target_124_genes_0_24147075
chr1	GCACGAGAACAGTCATCTTCATCACCAAGTACAACATTTC	+	3781248	3781287	3781288	3781748	3781293	3781294	Pper_target_125_genes_0_24147076
chr1	AAGTTACTGTAGAAAATGTTCAGAAAAATAAAAAGTTGAC	+	3789263	3789302	3789303	3789763	3789307	3789308	Pper_target_127_genes_0_24147078
chr1	TTGGGAAAACACGGTATATAAACCACGTAATTTTAATTTG	+	3792860	3792899	3792900	3793360	3792920	3792921	Pper_target_128_genes_0_24147079
chr1	TAATTTGCATAGGTTCTAATTTAAATACCAAGTGGTAGAC	+	3796174	3796213	3796214	3796674	3796216	3796217	Pper_target_129_genes_0_24147080
chr1	GCAGGAGAACCAGAGCCTAGAGAATTTTGTAAAGGTGTTG	+	3800137	3800176	3800177	3800637	3800178	3800179	Pper_target_130_genes_0_24147081
chr1	AGCAAAAGCTACCGTTCCATAATGAATTTTGTTAAAACTG	+	3803491	3803530	3803531	3803991	3803583	3803584	Pper_target_131_genes_0_24147082
chr1	AGAATTTTCGGAGAAAATGTTGGAACAAAATGAGAGAAGA	-	3891596	3891635	3891136	3891596	3891593	3891594	Pper_target_134_genes_0_24147085
chr1	AAGGAGCTTTCTCATCACATAAGCTTCAGCAATGGTAGAC	+	3895222	3895261	3895262	3895722	3895270	3895271	Pper_target_135_genes_0_24147086
chr1	ATGAAATTCGATACCAAAAGTTGAGCAAAGAGCGAAGCTG	+	3974694	3974733	3974734	3975194	3974758	3974759	Pper_target_137_genes_0_24147088
chr1	ATGAATAAAATGCGGTGAGAGTCGGGGAAATAAATTGAAA	+	3978070	3978109	3978110	3978570	3978134	3978135	Pper_target_138_genes_0_24147089
chr1	TATAGATTATCTTATATTTAGATTTTTCTTTGAAGTTTCT	+	3981334	3981373	3981374	3981834	3981376	3981377	Pper_target_139_genes_0_24147090
chr1	ATCCAATTAGCAGGTTTGGTGTTTGTCCGATGTTTATTAG	+	3985417	3985456	3985457	3985917	3985466	3985467	Pper_target_140_genes_0_24147091
chr1	GCAAAAAAATAAAAAATAATAACAAATAAATAAAACATAC	+	4054349	4054388	4054389	4054849	4054394	4054395	Pper_target_141_genes_0_24147092
chr1	GTATGATTTTAAAGAAATTTATCATTTATGTTAAATTATA	+	4057739	4057778	4057779	4058239	4057796	4057797	Pper_target_142_genes_0_24147093
chr1	TAGGCCCGGTGAGGAGGTTCAGACATGCTGAAGGCTCATT	+	4060796	4060835	4060836	4061296	4060851	4060852	Pper_target_143_genes_0_24147094
chr1	GAGTCATGATATATATAAACAACCACTAGACTCTAAGACC	+	4097214	4097253	4097254	4097714	4097254	4097255	Pper_target_144_genes_0_24147095
chr1	CGAAGAAAATAAGATCTAGTTCAGCCTAAAGGCTTTCAGC	+	4105943	4105982	4105983	4106443	4106000	4106001	Pper_target_145_genes_0_24147096
chr1	GGTTGTATAGTGAGCCAAGATCTTTCTGTTTTGAATCTTG	+	4127039	4127078	4127079	4127539	4127079	4127080	Pper_target_148_genes_0_24147099
chr1	CTATGAATCATGGTGGAAAAGTGGAATCTTGATTCTTGAG	+	4130658	4130697	4130698	4131158	4130700	4130701	Pper_target_149_genes_0_24147100
chr1	GTTAGAATTTAGTAAAAATCGCCAACCTCCGGATCAAAAC	+	4173733	4173772	4173773	4174233	4173795	4173796	Pper_target_150_genes_0_24147101
chr1	ATGTGTACAAGAAATTCACAAGCATTTTTGAGTTGATAAG	+	4176966	4177005	4177006	4177466	4177013	4177014	Pper_target_151_genes_0_24147102
chr1	AACTTTATTAAGACACCGAGTGATTAAGAGACAACCCATA	+	4184646	4184685	4184686	4185146	4184706	4184707	Pper_target_153_genes_0_24147104
chr1	TCAGCTATCAGAACATTAGCAGAAGAAAGTTGAGCTAGAG	+	4187691	4187730	4187731	4188191	4187751	4187752	Pper_target_154_genes_0_24147105
chr1	AATCACATATGTATTTTTCTAAGTGTTTTTACATCAATAA	+	4215869	4215908	4215909	4216369	4215929	4215930	Pper_target_155_genes_0_24147106
chr1	CACCGATGAATAGTTAGCGTAACAATGGGGTTTCAGAATG	+	4239999	4240038	4240039	4240499	4240056	4240057	Pper_target_157_genes_0_24147108
chr1	TGTTAATTAACCATATAATCTTAATTCAGGCATCAGAAAC	+	4263020	4263059	4263060	4263520	4263075	4263077	Pper_target_158_genes_0_24147109
chr1	GTTTGTAAGGTTCTTCTAAAATACCAAACCAATACTTTTC	+	4267167	4267206	4267207	4267667	4267217	4267218	Pper_target_159_genes_0_24147110
chr1	GGCACCATATTCTTCATTGAGTCCCATTAAAAAGTCATAC	+	4309563	4309602	4309603	4310063	4309620	4309621	Pper_target_161_genes_0_24147112
chr1	TGGTCAAATCCCTGACATTCAAACCCTTTTGATCGAGTTC	+	4315455	4315494	4315495	4315955	4315497	4315498	Pper_target_162_genes_0_24147113
chr1	TATGAAGCCGTCAATGCTTGCGTTGTACAACTTTGAAACG	+	4333595	4333634	4333635	4334095	4333652	4333653	Pper_target_163_genes_0_24147114
chr1	ACTTCATTTAAAAAGAACTAAAAGTAAATATAAACCAACC	+	4337566	4337605	4337606	4338066	4337610	4337611	Pper_target_164_genes_0_24147115
chr1	CAAGCTACTCAATTTCCAGTTCTTGTTTGTCTGCAAACTC	+	4359959	4359998	4359999	4360459	4360012	4360013	Pper_target_165_genes_0_24147116
chr1	AAACAATACAATTGTTTTTCTCGATATAACAGGGACAAGG	+	4365576	4365615	4365616	4366076	4365621	4365622	Pper_target_166_genes_0_24147117
chr1	GAAATCAAAATCAAAATCAACAAATGAGAAGTGGTTTATC	+	4369725	4369764	4369765	4370225	4369767	4369768	Pper_target_167_genes_0_24147118
chr1	CCATCTTCTTACGTATTCCCCATTCGGGTCAAATTTATAG	+	4373022	4373061	4373062	4373522	4373111	4373112	Pper_target_168_genes_0_24147119
chr1	TTAAAATGACTAGCGAATTATTTTATTTGTTTGTTTATAG	+	4377152	4377191	4377192	4377652	4377197	4377198	Pper_target_169_genes_0_24147120
chr1	GGCCATTTGGTTTAAAGTTGTTGATATATGTATCAATACC	+	4380662	4380701	4380702	4381162	4380717	4380718	Pper_target_170_genes_0_24147121
chr1	TTGATGTTTAGTATCAAGTCAGCCCGATTAATTTAAAAAA	+	4532300	4532339	4532340	4532800	4532359	4532360	Pper_target_171_genes_0_24147122
chr1	TATCAAATAGTTGCCGAATAAAAATATTTATATATTATAG	+	4846804	4846843	4846844	4847304	4846857	4846858	Pper_target_174_genes_0_24147125
chr1	TCCCTTCGACTCGTCGAGCCTGCTCTAAGCACTCGCCGAG	+	5005242	5005281	5005282	5005742	5005295	5005296	Pper_target_175_genes_0_24147126
chr1	CTTTTGAGCTAAAAAGGCCAAAAGAACACTCCACTGCTTG	+	5110486	5110525	5110526	5110986	5110528	5110529	Pper_target_176_genes_0_24147127
chr1	TCCACTTGATACGGGCTATAAGTTTCTCAATTGTTCTATG	+	5113696	5113735	5113736	5114196	5113755	5113756	Pper_target_177_genes_0_24147128
chr1	ATATACATTTAATCTTTATGACCAACTATTCCATGTTAAG	+	5134228	5134267	5134268	5134728	5134273	5134274	Pper_target_178_genes_0_24147129
chr1	GATCTGACAAATTTCCTGTAACTTGGCTTCAACGGAGGAG	+	5167721	5167760	5167761	5168221	5167782	5167783	Pper_target_179_genes_0_24147130
chr1	TGGGGAAGGTTCGGCTTTAGCCAACGACCTCCTGCGTGGT	+	5171583	5171622	5171623	5172083	5171631	5171632	Pper_target_180_genes_0_24147131
chr1	TTAGTTGTGTTTTCATTTTCTCTAAAATTTACAGATTTCC	+	5282348	5282387	5282388	5282848	5282405	5282406	Pper_target_181_genes_0_24147132
chr1	AATTATATGTCTTTATTTTAGATTGTACGTTAAAACATAC	+	5285521	5285560	5285561	5286021	5285578	5285579	Pper_target_182_genes_0_24147133
chr1	GACATTGACTTGGGGATATCTTCCATTCACGATTTCATAA	+	5328892	5328931	5328932	5329392	5328956	5328957	Pper_target_183_genes_0_24147134
chr1	CATTGGAATGGTGTTAGCAGATTTGGTTATGATGCTAAGG	+	5331940	5331979	5331980	5332440	5331993	5331994	Pper_target_184_genes_0_24147135
chr1	TTTCAATGAAAAAGAGAATGGTTTCCTTTCAACAAATGAC	+	5338797	5338836	5338837	5339297	5338853	5338854	Pper_target_186_genes_0_24147137
chr1	CAAAGTAATTTTCAATTTACTAAGAACCTCATGCAACCAG	+	5343107	5343146	5343147	5343607	5343171	5343172	Pper_target_187_genes_0_24147138
chr1	TTGAAAATAATTAGTTGGGAAATGAATATAAACCCAGAAT	+	5346790	5346829	5346830	5347290	5346853	5346854	Pper_target_188_genes_0_24147139
chr1	AAGGGTGCCGTAAATATATAATCCTAGTTTTGGTTAATAG	+	5350801	5350840	5350841	5351301	5350854	5350855	Pper_target_189_genes_0_24147140
chr1	TTCGGGGCCCACAACTTATGCTTGGATTGCTCCCTAGTCC	-	5382511	5382550	5382051	5382511	5382492	5382493	Pper_target_190_genes_0_24147141
chr1	AGAAAATATCTAAACAATCGGCAAGTAAGTAGAAAAGTTC	+	5385898	5385937	5385938	5386398	5385942	5385943	Pper_target_191_genes_0_24147142
chr1	TCTAACAGGTATCAATATAATTTTTGTTTATTTTTCTACT	+	5390938	5390977	5390978	5391438	5391001	5391002	Pper_target_192_genes_0_24147143
chr1	TTTAGAGGGTTTATTAACACCATAAAAAATCAAAGCGAAG	+	5394454	5394493	5394494	5394954	5394511	5394512	Pper_target_193_genes_0_24147144
chr1	TTTACTTATAATTTAATCACCCTTCTTATTTCTCATCTTG	+	5397686	5397725	5397726	5398186	5397744	5397745	Pper_target_194_genes_0_24147145
chr1	AAACGTGTTACTTGGCTTTCGTTTAAATCTCACTTGTTAC	+	5409227	5409266	5409267	5409727	5409287	5409288	Pper_target_195_genes_0_24147146
chr1	CAAAGGGGGTACAAAGCTTGAGTCTACAAAAAGTCAAAAC	+	5416018	5416057	5416058	5416518	5416070	5416071	Pper_target_196_genes_0_24147147
chr1	TTTTTGTGTAAATAAACAAAAGTTTTTTCATTAATTTGAG	+	5500797	5500836	5500837	5501297	5500846	5500847	Pper_target_198_genes_0_24147149
chr1	GTTTGAGATCTTTCCACAAATCAGTTCACTCCGTAACTTG	+	5504676	5504715	5504716	5505176	5504723	5504724	Pper_target_199_genes_0_24147150
chr1	GGCCTGATAGCATGTCAAGGTCCTTCTGCAATTGAGTCAC	+	5530851	5530890	5530891	5531351	5530910	5530911	Pper_target_200_genes_0_24147151
chr1	TCCCCCCAAATAACAGAAAACTAAAACTCCATTGCACATC	+	5535607	5535646	5535647	5536107	5535667	5535668	Pper_target_201_genes_0_24147152
chr1	ATACATCTCAGTAAATAATATAAAACAACCCAATATTATC	+	5538626	5538665	5538666	5539126	5538676	5538677	Pper_target_202_genes_0_24147153
chr1	CTGTACCTCATTCGGGATGTTACAAAACCAAGTATAAGGA	+	5579283	5579322	5579323	5579783	5579345	5579346	Pper_target_203_genes_0_24147154
chr1	TTTGATGGTGAATCTATCCAAAAAACGATGATGTTTCATG	+	5584933	5584972	5584973	5585433	5584988	5584989	Pper_target_204_genes_0_24147155
chr1	TAAATAGGATTTGAGGAGTTAAATTCTAGATTGTCTATTA	+	5732386	5732425	5732426	5732886	5732431	5732432	Pper_target_205_genes_0_24147156
chr1	AAACACTAGTCATTTCTTTTTGTATAATTTAGGTGCCAAC	+	5775744	5775783	5775784	5776244	5775791	5775792	Pper_target_206_genes_0_24147157
chr1	AATGTAAAGAATCACTATTCATACGATATAAATCCCAAAG	+	6068299	6068338	6068339	6068799	6068358	6068359	Pper_target_208_genes_0_24147159
chr1	AATATCTATATATAATAATGAATCATAGACCAAGATTTTC	+	6071824	6071863	6071864	6072324	6071866	6071867	Pper_target_209_genes_0_24147160
chr1	AGAATTCGAATTCCATTAGGGTTTTTCACACTTGAATTAT	+	6075294	6075333	6075334	6075794	6075355	6075356	Pper_target_210_genes_0_24147161
chr1	AGAACTTTTGCTAAGAAAATTCTGGATCGAGAATATTTAG	+	6078999	6079038	6079039	6079499	6079048	6079049	Pper_target_211_genes_0_24147162
chr1	CAAATCATCACTTGTGTAAAAAACACATACTCAAATCATC	+	6082588	6082627	6082628	6083088	6082645	6082646	Pper_target_212_genes_0_24147163
chr1	CCCTTCTCAGATGCTCCATCCCCCCTTTATGATGTTTCGT	+	6108822	6108861	6108862	6109322	6108877	6108878	Pper_target_213_genes_0_24147164
chr1	AATCTTGTGCTCAAACACATTTTAAATGAGATTTGTGACC	+	6112222	6112261	6112262	6112722	6112273	6112274	Pper_target_214_genes_0_24147165
chr1	CTGTGTGTGTGTGTGTGTGTATGTGTATTTAATTCCTATC	+	6115558	6115597	6115598	6116058	6115607	6115608	Pper_target_215_genes_0_24147166
chr1	AATTATAAAATTACATTTTAACATATTAATTAAAAAAAGG	+	6124670	6124709	6124710	6125170	6124725	6124726	Pper_target_216_genes_0_24147167
chr1	AGCAAAACCCTAGATCAAGATACAAACCCATCATTAATCC	+	6127889	6127928	6127929	6128389	6127931	6127932	Pper_target_217_genes_0_24147168
chr1	TTTTATATTAGATATTTTTGGTAGGCTGATATTAGTAGGC	+	6153514	6153553	6153554	6154014	6153577	6153578	Pper_target_220_genes_0_24147171
chr1	TTAGCAAACATATAATCCCATAAATTCAAAGCCTTCAAAC	+	6184893	6184932	6184933	6185393	6184952	6184953	Pper_target_222_genes_0_24147173
chr1	TGAACTCGCTTCACCTCATTGAAGAGATCAAACAATTGAC	+	6189083	6189122	6189123	6189583	6189129	6189130	Pper_target_223_genes_0_24147174
chr1	AACTGATTAGAAGAAATATCTTGAAGCCGTTGAGTTTTAC	+	6269963	6270002	6270003	6270463	6270027	6270028	Pper_target_224_genes_0_24147175
chr1	CAAACAGTCTTTCATGCATTGCAAATGCTCCAAGTAAAAA	+	6275135	6275174	6275175	6275635	6275195	6275196	Pper_target_225_genes_0_24147176
chr1	CCACCCAACATCAACACATTCTCCTGAATATCGATCTAAC	-	6289067	6289106	6288607	6289067	6289064	6289065	Pper_target_227_genes_0_24147178
chr1	CGGATATATAAAGTATCCAATATTTAATATAATTTTCTTG	+	6292512	6292551	6292552	6293012	6292555	6292556	Pper_target_228_genes_0_24147179
chr1	TTGGCCCGTGCGGTGGTGGACGATGTTTTAGCGCCGCTAC	+	6295530	6295569	6295570	6296030	6295589	6295590	Pper_target_229_genes_0_24147180
chr1	TCCAGTTTATTGCTTTATACAACCAAACAAGGGGTACATC	+	6299755	6299794	6299795	6300255	6299798	6299799	Pper_target_230_genes_0_24147181
chr1	CAGGCTCTGCTTAATCTTTCAACCATTCAAGATGGTATTG	+	6303198	6303237	6303238	6303698	6303251	6303252	Pper_target_231_genes_0_24147182
chr1	CATAGTAAAACACACAAAAACAGTAAAACACACTCTTAAC	+	6310559	6310598	6310599	6311059	6310605	6310606	Pper_target_233_genes_0_24147184
chr1	AAAATGTCACTATATGGCAATTAAATCTCGGAATCGTTTT	+	6314070	6314109	6314110	6314570	6314115	6314116	Pper_target_234_genes_0_24147185
chr1	CAACCCTTTGTTTGGTTATTGGGATTATTATTGTTGTGAA	-	6336453	6336492	6335993	6336453	6336442	6336443	Pper_target_235_genes_0_24147186
chr1	TTTCCGAGCAGAAATTCGTAGGATCAAGCAATATGAGGTG	+	6341081	6341120	6341121	6341581	6341129	6341130	Pper_target_236_genes_0_24147187
chr1	CAGACCTGTACAGCCGACGCCCCCTCCCCCCTTTCTCACG	+	6344606	6344645	6344646	6345106	6344649	6344650	Pper_target_237_genes_0_24147188
chr1	AATGAGTAATTTTATCCATCATTTATATCATCTTTTCTGC	+	6348055	6348094	6348095	6348555	6348102	6348103	Pper_target_238_genes_0_24147189
chr1	TGCGTAACAGCTCTACGCTCTGCATAGAGCATCAAGTGGC	+	6373066	6373105	6373106	6373566	6373111	6373112	Pper_target_240_genes_0_24147191
chr1	GTTTTACAATATTAAAGGATTTTTACCGAGGTTTTTACAC	+	6376177	6376216	6376217	6376677	6376236	6376237	Pper_target_241_genes_0_24147192
chr1	TTACAGGAACACAACATTATTTCAAAAGATATTAGATTGA	-	6379259	6379298	6378799	6379259	6379243	6379244	Pper_target_242_genes_0_24147193
chr1	ATAAAGTTGTTAACTTTATGTCCATGCAAAGTATTAAGAG	-	6382415	6382454	6381955	6382415	6382393	6382394	Pper_target_243_genes_0_24147194
chr1	ACATAATAAGTTATAATAAGTTAGACATATATTAAAGATC	+	6430044	6430083	6430084	6430544	6430097	6430098	Pper_target_244_genes_0_24147195
chr1	TTTTATTTAACCATAGAAAATACAACATAGGGATTAAAAG	+	6433544	6433583	6433584	6434044	6433608	6433609	Pper_target_245_genes_0_24147196
chr1	CATATTTTAGATCTATGACTAAAATACACTCCAAAGTCAT	+	6449511	6449550	6449551	6450011	6449558	6449559	Pper_target_246_genes_0_24147197
chr1	TCTAAATCTTATGTTTTTAGTTATTCCACCATGTGGTCTC	+	6452914	6452953	6452954	6453414	6452966	6452967	Pper_target_247_genes_0_24147198
chr1	GTTTCATTTGAATCAAAAGGAAAAATTACTTTTTCTTTAC	+	6456187	6456226	6456227	6456687	6456240	6456241	Pper_target_248_genes_0_24147199
chr1	TAGATTAAATGAACTTATTAAAGAAGAGGGGCTGTTTTGC	+	6533342	6533381	6533382	6533842	6533383	6533384	Pper_target_251_genes_0_24147202
chr1	ATTCAATTAATTGTGGATGTAAATCATCTTCATAAATCTT	+	6539740	6539779	6539780	6540240	6539783	6539784	Pper_target_253_genes_0_24147204
chr1	ATGAGCACTGCTTGCTAAACTTCGTAGGCTACTAGTAAAG	+	6542726	6542765	6542766	6543226	6542785	6542786	Pper_target_254_genes_0_24147205
chr1	ATGCGAATCTTCTCGGATGCGAACCTACTGATGCGAAACC	+	6562927	6562966	6562967	6563427	6562990	6562991	Pper_target_256_genes_0_24147207
chr1	TCAACCATAGTGAATTCAACACACAGGGACAATTCTTTTG	+	6566502	6566541	6566542	6567002	6566565	6566566	Pper_target_257_genes_0_24147208
chr1	TAAGAAAAAATGATTAATTAGCCTAAGAGATATGGTAACT	+	6574204	6574243	6574244	6574704	6574247	6574248	Pper_target_258_genes_0_24147209
chr1	CATAAATATATATGTAGTAAGATATTTATATATATTTCTC	+	6579170	6579209	6579210	6579670	6579229	6579230	Pper_target_259_genes_0_24147210
chr1	ATGGCATAGGAAATTTTATGTGACCTAGATCTAAAGTTTG	-	6586593	6586632	6586133	6586593	6586590	6586591	Pper_target_260_genes_0_24147211
chr1	AAATTCGATGGGCTTCATATATACATCAAATCTCCTAATA	+	6649383	6649422	6649423	6649883	6649436	6649437	Pper_target_261_genes_0_24147212
chr1	ATAACTATCACGACACTGTCATTGTAGCTTATGAACACTC	+	6685288	6685327	6685328	6685788	6685332	6685333	Pper_target_262_genes_0_24147213
chr1	CAGTCGAACTAACATTACACAGAAAATGACCAAAATATCC	+	6789118	6789157	6789158	6789618	6789203	6789204	Pper_target_265_genes_0_24147216
chr1	ATGACACGTCAACAGTAAGGTTACCGTTATCTTGGAGTAC	+	6876592	6876631	6876632	6877092	6876647	6876648	Pper_target_266_genes_0_24147217
chr1	CTGATTTTCTTAAAACTTTTAAAACCGTTTCTATCTGTTG	+	6973489	6973528	6973529	6973989	6973530	6973531	Pper_target_269_genes_0_24147220
chr1	TCAAAATCAAAATATAATCAAATTAAATATCATTTATAGT	+	7130136	7130175	7130176	7130636	7130187	7130188	Pper_target_271_genes_0_24147222
chr1	TCTTAAACTCCTCATAGTCCCTCTGTATTTCAAATGATTG	+	7315811	7315850	7315851	7316311	7315873	7315874	Pper_target_272_genes_0_24147223
chr1	CTAGTTGAATAGCATGTAAAGCCTGAGCGTTCTTCTTTTG	+	7388746	7388785	7388786	7389246	7388806	7388807	Pper_target_274_genes_0_24147225
chr1	ATAAACTTGTTACCTAGTAGTTTAGTGACTACCGAATTGC	+	7393268	7393307	7393308	7393768	7393320	7393321	Pper_target_275_genes_0_24147226
chr1	AGCAAAGGCTTTGGTGTAGCGAATACCAGTTTAGCCTTTT	+	7446304	7446343	7446344	7446804	7446362	7446363	Pper_target_276_genes_0_24147227
chr1	TTTTTATATGGTTGAAATCTGAAAGTTAGATAAATTATCG	+	7481197	7481236	7481237	7481697	7481252	7481253	Pper_target_277_genes_0_24147228
chr1	TGATTTTTGTTGGACGATTGTATTTGCTTTAAGAATTTAG	+	7484514	7484553	7484554	7485014	7484570	7484571	Pper_target_278_genes_0_24147229
chr1	TTGGCCCAAGACCTAACCATCTCCTCATACACATTGATTT	+	7529555	7529594	7529595	7530055	7529607	7529608	Pper_target_279_genes_0_24147230
chr1	TTAAGTTTTGGAAACTACATGATAAATTTACTGATACATG	+	7533610	7533649	7533650	7534110	7533669	7533670	Pper_target_280_genes_0_24147231
chr1	CCCACCATGTCTTTTATGACATCAAAATTTGAGTGCTTTG	+	7537287	7537326	7537327	7537787	7537334	7537335	Pper_target_281_genes_0_24147232
chr1	CCTTGGAAGAAAAGAACACTTGGGTCTTAACACATCTTCC	+	7541322	7541361	7541362	7541822	7541379	7541380	Pper_target_282_genes_0_24147233
chr1	AGGTTTCATACAAAGTGCTCACATCTCTCAATCTGTCATC	+	7544894	7544933	7544934	7545394	7544958	7544959	Pper_target_283_genes_0_24147234
chr1	CCAACTATCTTTAATTTTTCATCTATTCAACTTTCCCATC	+	7548330	7548369	7548370	7548830	7548382	7548383	Pper_target_284_genes_0_24147235
chr1	TTAGAATTAATTTTGAGATTAATTGGAATTAGTTAAAAAT	-	7552872	7552911	7552412	7552872	7552863	7552864	Pper_target_285_genes_0_24147236
chr1	GGTTATACATAGCTATATGGTCCGATTATAACCATTTTCC	+	7588443	7588482	7588483	7588943	7588507	7588508	Pper_target_286_genes_0_24147237
chr1	TTTATTTATCTTTGGGAATCTTGTGCTGTAAATAAGAAAA	+	7592361	7592400	7592401	7592861	7592425	7592426	Pper_target_287_genes_0_24147238
chr1	TATCCCATATTTGATTTGATGCAAGAGACTTTGGAAATTG	+	7648631	7648670	7648671	7649131	7648679	7648680	Pper_target_288_genes_0_24147239
chr1	AATATAAATAATACATGAATACGATTATAAAAACAAACAC	+	7651963	7652002	7652003	7652463	7652004	7652005	Pper_target_289_genes_0_24147240
chr1	ATTTGACAATTCTTACGACAAACAAAGCAAATTTACCATC	+	7655120	7655159	7655160	7655620	7655166	7655167	Pper_target_290_genes_0_24147241
chr1	CTTCTTATAGTGTTCAAGAAAATGATGAACTAAATGATTG	+	7672855	7672894	7672895	7673355	7672910	7672911	Pper_target_291_genes_0_24147242
chr1	TGGATTACTGGTAAGAACTGAAACAGATTTTGATGAAATG	+	7676292	7676331	7676332	7676792	7676336	7676337	Pper_target_292_genes_0_24147243
chr1	GGTGGACTTGTAGCGCGAGATTTAGTCGGTTAGATTACTG	+	7868876	7868915	7868916	7869376	7868930	7868931	Pper_target_293_genes_0_24147244
chr1	TTTCAAAGTAGAAAAGCAATTGAAAGTACAATGTTATGTG	+	7888878	7888917	7888918	7889378	7888932	7888933	Pper_target_294_genes_0_24147245
chr1	TCACTAGTATTTTATGATTAACCTTCATGTCTTTTTGTGG	+	7934492	7934531	7934532	7934992	7934538	7934539	Pper_target_295_genes_0_24147246
chr1	AGCCCGCTATCTCGGGCCCCGCCCAACATCAGACACATCC	+	7940091	7940130	7940131	7940591	7940131	7940132	Pper_target_296_genes_0_24147247
chr1	CACAAAAGAGTATCTTTTAATTTTATTTTGGGTCTGTACC	+	8319637	8319676	8319677	8320137	8319689	8319690	Pper_target_298_genes_0_24147249
chr1	AAAATGAAGCATAGTTGCCCAATGTTGTTGGAGATTCGTA	+	8330394	8330433	8330434	8330894	8330457	8330458	Pper_target_299_genes_0_24147250
chr1	AATTTTTTTGGTGAATATATTATAATGGGAGATTTTAACG	+	8644179	8644218	8644219	8644679	8644229	8644230	Pper_target_301_intergenic_0_24147252
chr1	CACATTTGTATTTGTTAGAATGCGAACATGACAAATTTAC	+	8698143	8698182	8698183	8698643	8698183	8698184	Pper_target_302_genes_0_24147253
chr1	ATATATGTTATATATAGATATGTGATAGAACTTACTCAGG	+	8791078	8791117	8791118	8791578	8791123	8791124	Pper_target_303_genes_0_24147254
chr1	TGCCGGCCATATCTTAATTACCAGCCAAAATAAACATTAG	+	8806171	8806210	8806211	8806671	8806228	8806229	Pper_target_304_genes_0_24147255
chr1	TCAGGACCAAGATACCACTCCTTGAGGAAGCAATTGAGAG	+	8836672	8836711	8836712	8837172	8836727	8836728	Pper_target_305_genes_0_24147256
chr1	TCTCTTATTCTAAAATAATGTTTACTTTCTCGTCCATTCG	+	8866581	8866620	8866621	8867081	8866624	8866625	Pper_target_306_genes_0_24147257
chr1	GTTGAATACGGGAAGGAAAACGACAAACATTTCACCATTC	-	9005711	9005750	9005251	9005711	9005707	9005708	Pper_target_309_genes_0_24147260
chr1	TAATGCTATTTGATTTTAATCCGAGTGGTCCCATATTTTG	+	9169883	9169922	9169923	9170383	9169938	9169939	Pper_target_312_genes_0_24147263
chr1	TATACTTTGGAAAAACTACATAGTTATGTCAATATATTTC	+	9174305	9174344	9174345	9174805	9174360	9174361	Pper_target_313_genes_0_24147264
chr1	TGTAGATATAAAATACATATATAGTCTAGACCTTGAAAAA	-	9376589	9376628	9376129	9376589	9376562	9376563	Pper_target_314_intergenic_0_24147265
chr1	CATGTTCCGGAGTCGAATCAGCACAATCCGGAGTCAAAAG	+	9785626	9785665	9785666	9786126	9785667	9785668	Pper_target_317_genes_0_24147268
chr1	ATCGCCGTTTTCCTTATCGGTTACGCTGCCGACATTGGTG	+	9789725	9789764	9789765	9790225	9789768	9789769	Pper_target_318_genes_0_24147269
chr1	ATATTTATATAAAAGTGTTTGTAAGCTTTTTAAAATGTGT	+	9793111	9793150	9793151	9793611	9793200	9793201	Pper_target_319_genes_0_24147270
chr1	TGCTTTGTATTCCGTCAACAACACCTTTCTCCGTTAGTAG	+	9878969	9879008	9879009	9879469	9879016	9879017	Pper_target_320_genes_0_24147271
chr1	TGGCATAATCCTTAATGAAATTCAAGGCGTGAGTCTTGTG	+	9953393	9953432	9953433	9953893	9953439	9953440	Pper_target_321_genes_0_24147272
chr1	GAATCGTTTTACCATTAATAGCAATATGTAACATATAAAG	+	9960843	9960882	9960883	9961343	9960892	9960893	Pper_target_322_genes_0_24147273
chr1	CACTTTGAATTTATATCGAAACATACATAAAACAAACACG	+	9970996	9971035	9971036	9971496	9971059	9971060	Pper_target_323_genes_0_24147274
chr1	GTAAATTTATCCTTTGTATTGGGCCCATCATAAAAAACTC	+	10015190	10015229	10015230	10015690	10015249	10015250	Pper_target_324_genes_0_24147275
chr1	CCCCAAAACCATTGAATTTAGTTCAGTTTTGGAAAAAGAC	+	10023352	10023391	10023392	10023852	10023397	10023398	Pper_target_325_genes_0_24147276
chr1	TCTTCCCGTTCCCAATGTATTCGACGACAATCCTCTTTTT	+	10031640	10031679	10031680	10032140	10031691	10031692	Pper_target_326_genes_0_24147277
chr1	TATTTATTTATCCAAGGCACCAATTCTTTTATTTAATTTC	+	10035125	10035164	10035165	10035625	10035185	10035186	Pper_target_327_genes_0_24147278
chr1	GGGGTAGATACTTTGTTCTTGGAACATAACAGAATAATGA	+	10045840	10045879	10045880	10046340	10045881	10045882	Pper_target_328_genes_0_24147279
chr1	AAAACTACTTTGCAATCGATGACATTGTTATAACTAGGTA	+	10050093	10050132	10050133	10050593	10050152	10050153	Pper_target_329_genes_0_24147280
chr1	CTTGGGCAAAACATGCAATCGCAACTCTTGTCCATGCAAT	+	10057361	10057400	10057401	10057861	10057417	10057418	Pper_target_330_genes_0_24147281
chr1	CTCATCATAAATCATTTTGTTCAGGCCTTTAGGGGAATGG	+	10096062	10096101	10096102	10096562	10096126	10096127	Pper_target_332_genes_0_24147283
chr1	ATGATAGACTTTTACTAGACAGAAACACCATAACAACAAC	+	10105871	10105910	10105911	10106371	10105915	10105916	Pper_target_333_genes_0_24147284
chr1	CATCATAAATAATAACTGCATAAATTTTCATAAAAAGCAC	+	10110746	10110785	10110786	10111246	10110809	10110810	Pper_target_334_genes_0_24147285
chr1	TCATGAGGAGGGATTCAAAATTCAAAAACATCTCAAACTG	+	10125331	10125370	10125371	10125831	10125390	10125391	Pper_target_335_genes_0_24147286
chr1	ACATGAGAATATTCACCAGTCTGAATGCTATTTTGTTGAG	+	10130802	10130841	10130842	10131302	10130854	10130855	Pper_target_336_genes_0_24147287
chr1	GTAACCATACGTCGTCGATTTGTAAAATTTGGTTGCATTC	-	10133887	10133926	10133427	10133887	10133861	10133862	Pper_target_337_genes_0_24147288
chr1	AAAACACATTTACACAAATAACAATTAAAAAAATGTTATG	+	10137071	10137110	10137111	10137571	10137130	10137131	Pper_target_338_genes_0_24147289
chr1	GGAGGAGGAGGATATGAGCAACTTGACAACGAGGACATTG	+	10214925	10214964	10214965	10215425	10214988	10214989	Pper_target_339_genes_0_24147290
chr1	TACAAAATCCAGCGCCTATCGAGAAACGGAAAACTAGAAC	+	10226384	10226423	10226424	10226884	10226434	10226435	Pper_target_340_genes_0_24147291
chr1	GTTGCTTAAAATCACTGAGCCAATTATTGTTGCGTATAAC	+	10230922	10230961	10230962	10231422	10230968	10230969	Pper_target_341_genes_0_24147292
chr1	ACAAAAAAGTGGTTTCTTTTAAACCAAAAATGGTAAAAAA	+	10358066	10358105	10358106	10358566	10358121	10358122	Pper_target_342_genes_0_24147293
chr1	TCGGACAGGTTTCGAAGAATAGTGGACCGTGGAGCGTATC	+	10363547	10363586	10363587	10364047	10363600	10363601	Pper_target_343_genes_0_24147294
chr1	AATTTATATAAATTAATTGAACTTTGAAGATGTTCTTGAG	+	10392091	10392130	10392131	10392591	10392134	10392135	Pper_target_344_genes_0_24147295
chr1	TATAAATTGTTAACTGCCTTCAAAAGACAACTTCCATAAG	+	10395140	10395179	10395180	10395640	10395198	10395199	Pper_target_345_genes_0_24147296
chr1	TTAAAAGTTGAAATCTGAAGATTAATCAACAAAAAACTTA	+	10405825	10405864	10405865	10406325	10405914	10405915	Pper_target_346_genes_0_24147297
chr1	TTCTCAGATGTTTTGAATGAAGAAAAAAATCAAAGAAGTA	+	10589125	10589164	10589165	10589625	10589184	10589185	Pper_target_347_genes_0_24147298
chr1	ATCAAAGAGGGGTGGGCTCAAGGATACTTATCCAGATGAT	+	10640044	10640083	10640084	10640544	10640094	10640095	Pper_target_348_genes_0_24147299
chr1	GATGGACACGGGCGGTGCACCGTATTGACCCACGGGCACG	+	10734399	10734438	10734439	10734899	10734446	10734447	Pper_target_350_genes_0_24147301
chr1	AATTTACTTTGCAAAACATATTTAGTTCAAAACCCTCTTC	+	10898503	10898542	10898543	10899003	10898554	10898555	Pper_target_351_genes_0_24147302
chr1	TTCTATATGAAAGAAAAAGACAAGTTATTTATCCCCAAAC	+	10901846	10901885	10901886	10902346	10901896	10901897	Pper_target_352_genes_0_24147303
chr1	GTCGTCATCATTGACATCGTGTTGTTGGAATTGCCTTTGC	+	10905206	10905245	10905246	10905706	10905252	10905253	Pper_target_353_genes_0_24147304
chr1	TTCCACTACTGTTATTGCTTCCTTCCGTGATTCCGATGAC	+	11096103	11096142	11096143	11096603	11096165	11096166	Pper_target_355_genes_0_24147306
chr1	GATGATTCAACAAAGTATCGGCCCGCAGATGAAATTGAAC	+	11100725	11100764	11100765	11101225	11100776	11100777	Pper_target_356_genes_0_24147307
chr1	CACATCTCACTTATTCTCGCTTTTTAAATTTATTTTTTTG	+	11106952	11106991	11106992	11107452	11107007	11107008	Pper_target_357_genes_0_24147308
chr1	ATTTTGAAAATCTAAAACTAAAATGTAATTTCATTAATAA	-	11162853	11162892	11162393	11162853	11162832	11162833	Pper_target_358_genes_0_24147309
chr1	ATTTTATAATACCGCTATAAACTAATAAATTAAAAACTTC	+	11166725	11166764	11166765	11167225	11166780	11166781	Pper_target_359_genes_0_24147310
chr1	TAAGATGTATGTTTATGTTTAAAAACTAATAAGTCTCTCC	+	11170745	11170784	11170785	11171245	11170809	11170810	Pper_target_360_genes_0_24147311
chr1	ACTACACACGTGTGCGGGCAGGCATTCTCTCATAATAAGC	+	11173883	11173922	11173923	11174383	11173927	11173928	Pper_target_361_genes_0_24147312
chr1	ATTTATTTATTTATCAAATACCAATACATAAATAATATTG	+	11208146	11208185	11208186	11208646	11208205	11208206	Pper_target_362_genes_0_24147313
chr1	ATAAGTGATCCAACTATTCTACTTCAAGATCACAAATAAG	+	11215855	11215894	11215895	11216355	11215913	11215914	Pper_target_363_genes_0_24147314
chr1	TGGAAACAAAGATGCTAATTAACAGACATACCTACATCCT	+	11219589	11219628	11219629	11220089	11219653	11219654	Pper_target_364_genes_0_24147315
chr1	AAGAAGACCTAAACACTCGGGTGGGTTTTCATCTTCATTG	+	11285761	11285800	11285801	11286261	11285817	11285818	Pper_target_365_genes_0_24147316
chr1	GATACGACTTACAGACAAGATAAAGAATCGTCTGAACAAC	+	11289036	11289075	11289076	11289536	11289081	11289082	Pper_target_366_genes_0_24147317
chr1	TATTTTTATTTTTGAACAACAAACACGAAAATTCAATAAA	+	11330692	11330731	11330732	11331192	11330732	11330733	Pper_target_367_genes_0_24147318
chr1	CTATTATTTATTAGAGCAGTGGATTTCCTTTAAAACTTTG	+	11414037	11414076	11414077	11414537	11414080	11414081	Pper_target_369_genes_0_24147320
chr1	AAGTTCTGTTTGTTACATAACTAGCATTTGAGGCCCATTT	+	11433672	11433711	11433712	11434172	11433713	11433714	Pper_target_370_genes_0_24147321
chr1	AACCAATGTATTTGAGACATTGTTGTTGTGTAATTCATTC	+	11437816	11437855	11437856	11438316	11437877	11437878	Pper_target_371_genes_0_24147322
chr1	AATTTAGAGTTTTTGAAATAACAAAATAAATAGTAAATAA	+	11449694	11449733	11449734	11450194	11449740	11449741	Pper_target_372_genes_0_24147323
chr1	CTTATTGGAGCTAGTGATAACTACTGAAAACTTATTTGAC	+	11452817	11452856	11452857	11453317	11452878	11452879	Pper_target_373_genes_0_24147324
chr1	AATGAAGAGATCTAGGTTTAAACTCGAATGAAGAGATCAA	+	11469377	11469416	11469417	11469877	11469431	11469432	Pper_target_374_genes_0_24147325
chr1	CGGCGTGTAAGCATCTCCCGTTCCCAAACTTCTCATACTC	+	11472507	11472546	11472547	11473007	11472547	11472548	Pper_target_375_genes_0_24147326
chr1	ACCTTACGATCCTCTATAGCAATATCCACTCTTAAATATC	+	11475582	11475621	11475622	11476082	11475637	11475639	Pper_target_376_genes_0_24147327
chr1	ACAAAAGCTCCAGAATACGATAACAGAACGGCGATGTCAG	+	11499576	11499615	11499616	11500076	11499640	11499641	Pper_target_378_genes_0_24147329
chr1	ATTCCGTTCATCATACCCGCTTGATGACCACCCATCCCCC	+	11502654	11502693	11502694	11503154	11502703	11502704	Pper_target_379_genes_0_24147330
chr1	ATGTATCTTATTGGATTGAAATAGATAACAAAGTAGATTT	+	11505875	11505914	11505915	11506375	11505925	11505926	Pper_target_380_genes_0_24147331
chr1	ACAAATATGTACCAACCAAACTTATTTGTAGCCAAATAGG	+	11511542	11511581	11511582	11512042	11511599	11511600	Pper_target_381_genes_0_24147332
chr1	AATAAAAAACATTAAGAAAAACTGAAAAATAATAGAAAAT	+	11591194	11591233	11591234	11591694	11591235	11591236	Pper_target_382_genes_0_24147333
chr1	AATTAGGGTTTTATCACTTGTGATTTAGTAAGAGGATTTC	+	11644277	11644316	11644317	11644777	11644328	11644329	Pper_target_383_genes_0_24147334
chr1	ACAGCGATGATTGCTGGTTATGTTCAAGTTGGTTTTCCTG	+	11648639	11648678	11648679	11649139	11648698	11648699	Pper_target_384_genes_0_24147335
chr1	CACAAGCCGATAAAACTGATAAAAAAGTTATTTCATTTGG	+	11658341	11658380	11658381	11658841	11658396	11658397	Pper_target_385_genes_0_24147336
chr1	TGGTGTGACTCGGATTAGGTTGCTTGCCCGATCACACGAC	+	11711377	11711416	11711417	11711877	11711426	11711427	Pper_target_387_genes_0_24147338
chr1	AACCCACAACTACCATGTAAGAGACTTTTAAACATGAGAC	+	11715791	11715830	11715831	11716291	11715844	11715845	Pper_target_388_genes_0_24147339
chr1	AGGTGCAAACTTTATGGTGGTGTTGGTTTCATGCATGTGT	-	11749843	11749882	11749383	11749843	11749819	11749820	Pper_target_389_genes_0_24147340
chr1	AAATTTATAACATTAATTATTAGAAAAATCTCATTCATCG	+	11753822	11753861	11753862	11754322	11753863	11753864	Pper_target_390_genes_0_24147341
chr1	TTCCTGGCTGGAGCTGATTTTTTCATATAATACATATTTG	+	11757922	11757961	11757962	11758422	11757971	11757972	Pper_target_391_genes_0_24147342
chr1	TTTAGAAATAAACTCTACAAGACTAGAAATTTAAGAGTAA	+	11763366	11763405	11763406	11763866	11763417	11763418	Pper_target_392_genes_0_24147343
chr1	CATCAGCATCTTCATTATCAGAGTCTTCTGAATCATCATC	+	11766755	11766794	11766795	11767255	11766797	11766798	Pper_target_393_genes_0_24147344
chr1	TAATATGATTAGTTAAAACAAAAAGAAATAAAAATCAGTC	+	11804656	11804695	11804696	11805156	11804697	11804698	Pper_target_395_genes_0_24147346
chr1	TCGAACGACAAACCAGGTGCTATCGGGTATGATGGATCTC	+	11809369	11809408	11809409	11809869	11809412	11809413	Pper_target_396_genes_0_24147347
chr1	AGAAACTGTTTATACCTTTTATAATATTAAAAATAATAAC	+	11837474	11837513	11837514	11837974	11837519	11837520	Pper_target_397_genes_0_24147348
chr1	TATGCATCTATTCATTGGACTAAAAAATGGGTTAATAATG	+	11858544	11858583	11858584	11859044	11858601	11858602	Pper_target_399_genes_0_24147350
chr1	TGGAAAAACATTAAAAATGTCAAACCAATTACAAGGATAC	+	11872230	11872269	11872270	11872730	11872286	11872287	Pper_target_400_genes_0_24147351
chr1	TTTTTTTATGTGTTTATGATATTTTTATCTATAAACTTTG	+	11875299	11875338	11875339	11875799	11875346	11875347	Pper_target_401_genes_0_24147352
chr1	CTGTTTAAAGACATTAGGAAAATGATCTTTTTCTATAATC	+	11930585	11930624	11930625	11931085	11930640	11930641	Pper_target_402_genes_0_24147353
chr1	TTTAATTTGGTGATACGTTAGCAGACTATGAACAATACAC	+	11935141	11935180	11935181	11935641	11935187	11935188	Pper_target_403_genes_0_24147354
chr1	AATAGTCAAAAGATGTGAAGTGACCGATTTAAAATAAAAG	+	11945111	11945150	11945151	11945611	11945168	11945169	Pper_target_405_genes_0_24147356
chr1	TCATTAACAGAGCTAATTAAAAAAATCATACATTAAAATG	+	11949926	11949965	11949966	11950426	11949975	11949976	Pper_target_406_genes_0_24147357
chr1	ATATAACTTCATTACCTTTCTACATAATTAATTGGGATTC	+	11962427	11962466	11962467	11962927	11962470	11962471	Pper_target_407_genes_0_24147358
chr1	GGTTTGATGTTGGTATGATTCGTAAAGGTAGTGAAAGTAG	+	11965657	11965696	11965697	11966157	11965698	11965699	Pper_target_408_genes_0_24147359
chr1	GCATGGGTTTTGATAACAATACTTCAGTATATGTGGCAGC	+	11968898	11968937	11968938	11969398	11968955	11968956	Pper_target_409_genes_0_24147360
chr1	CATATAGAACCAACATAGAAATACAAAATATGGATACAAG	+	12014770	12014809	12014810	12015270	12014831	12014832	Pper_target_410_genes_0_24147361
chr1	TACGTAACCAAAATTAATCACGATTTTGACCATTTCCTAC	+	12017790	12017829	12017830	12018290	12017833	12017834	Pper_target_411_genes_0_24147362
chr1	ATTCCAGCCCAAAAGAAGCGACTTACTTTCTGTGTAGAAG	+	12021043	12021082	12021083	12021543	12021104	12021105	Pper_target_412_genes_0_24147363
chr1	TTAGTGGAATATTTAAAGAAAGAACAATATAGCAAACAAG	+	12064913	12064952	12064953	12065413	12064977	12064978	Pper_target_414_genes_0_24147365
chr1	CTCTTTGAGGGAGCCTTCCTCTTCTTAACCCCCCTTGACC	-	12189947	12189986	12189487	12189947	12189940	12189941	Pper_target_415_genes_0_24147366
chr1	TATCTTAAGTAGAATAATGCATGCTTTTAGTGGTTAAGAG	+	12226928	12226967	12226968	12227428	12226987	12226988	Pper_target_419_genes_0_24147370
chr1	AATGGTTACTACATTCGGAACACCAATAATATTAGACCAC	+	12230042	12230081	12230082	12230542	12230088	12230089	Pper_target_420_genes_0_24147371
chr1	TTACATACATATGATTATGAATGATTGTGCTTGGAAGATG	+	12478554	12478593	12478594	12479054	12478603	12478604	Pper_target_423_genes_0_24147374
chr1	ATACATCTTATTTTTCTCCAAATCCAACATAATTAGTACC	+	12675979	12676018	12676019	12676479	12676033	12676034	Pper_target_425_genes_0_24147376
chr1	CATCTCTAATTAAATGAGATAATCGGCAAAACAGGTGATA	+	12728805	12728844	12728845	12729305	12728846	12728847	Pper_target_426_genes_0_24147377
chr1	TCTTCAAATAAATACCTACCTTGCCTAAAAGAGGAGAAAG	+	12741989	12742028	12742029	12742489	12742041	12742042	Pper_target_427_genes_0_24147378
chr1	AAGCAATCATAGCAATGTAAAATCACTGTGTTGTTGAAAG	+	12780893	12780932	12780933	12781393	12780941	12780942	Pper_target_428_genes_0_24147379
chr1	AGTTACATTCACAATAAAATATGAAGCTACCATTCATACG	+	12785013	12785052	12785053	12785513	12785068	12785069	Pper_target_429_genes_0_24147380
chr1	TGGGAATAATTTGATTAATCCGACACCCGACCCTTCTGTC	+	12854955	12854994	12854995	12855455	12855008	12855009	Pper_target_430_genes_0_24147381
chr1	TATGACATATACATGGATACATTGTAAAGAAGAGTATGAA	+	12865170	12865209	12865210	12865670	12865211	12865212	Pper_target_431_genes_0_24147382
chr1	AATTTAGATTTATAAACTTTAGCTGTTGTATTTTCTCTCG	+	12869004	12869043	12869044	12869504	12869044	12869045	Pper_target_432_genes_0_24147383
chr1	GTCCTGAACTTCATTAAAGAGTCCAAAAAATCACATATTC	+	12875650	12875689	12875690	12876150	12875705	12875706	Pper_target_433_genes_0_24147384
chr1	ACCTCAGCCTCAATATGAACTTGAAACATTTGAAACAAAG	-	12879069	12879108	12878609	12879069	12879066	12879067	Pper_target_434_genes_0_24147385
chr1	TTTTAAAAGGTTTATATTTAGTTAATTGTATGTAGCAGTG	+	12951520	12951559	12951560	12952020	12951563	12951564	Pper_target_435_genes_0_24147386
chr1	CCTCCATTGAATGTGCTGAAACATTTGTACTATCCATATC	+	12958638	12958677	12958678	12959138	12958684	12958685	Pper_target_436_genes_0_24147387
chr1	GAAAAACTACTGCAATCAATTGCTTAACAGGAATTACACC	+	13005612	13005651	13005652	13006112	13005657	13005658	Pper_target_437_genes_0_24147388
chr1	GTAGGTATGCATTGTTATGGAACAAATGCTTCGGTTACTC	+	13021536	13021575	13021576	13022036	13021592	13021593	Pper_target_438_genes_0_24147389
chr1	CAAAACTTCTATAAGAAGTTGAAAATTAAGCTAAAAAACC	+	13025331	13025370	13025371	13025831	13025388	13025389	Pper_target_439_genes_0_24147390
chr1	CAGTGATAAAGAGTAGTAACGGTTTGAAAGGATTTAAAGG	-	13031256	13031295	13030796	13031256	13031250	13031251	Pper_target_440_genes_0_24147391
chr1	TTCTCCAGAATTAATTTGACAAGAGAAGGGTAAGTTTGTG	+	13035014	13035053	13035054	13035514	13035064	13035065	Pper_target_441_genes_0_24147392
chr1	TTTTGTGAACCTTATTGGCAAGCTAGGCATTTTATTTTTG	+	13038395	13038434	13038435	13038895	13038454	13038455	Pper_target_442_genes_0_24147393
chr1	TCCACATTGAAGTTGAACCCACCAATCCGATGTCGCCTTT	-	13041483	13041522	13041023	13041483	13041480	13041481	Pper_target_443_genes_0_24147394
chr1	CAATGGAAATTTGGCAGGAAATCATGCAAAGACATTGGTC	+	13061027	13061066	13061067	13061527	13061067	13061068	Pper_target_444_genes_0_24147395
chr1	ACCACTGAACTGGCCCACACTGTTAGCATCATGTGACATG	+	13064160	13064199	13064200	13064660	13064219	13064220	Pper_target_445_genes_0_24147396
chr1	GTGTCACGAAGTTTGCATTTACACATTTCTAGCATAAGAC	+	13067291	13067330	13067331	13067791	13067332	13067333	Pper_target_446_genes_0_24147397
chr1	ATTCACTGAAAATAAATTAACTTGTGGACATGTACTTCTG	+	13070808	13070847	13070848	13071308	13070849	13070850	Pper_target_447_genes_0_24147398
chr1	TCAGGGAACTCAACGAGTAGGGGGTGAGTCGACGAGTTGG	+	13074377	13074416	13074417	13074877	13074440	13074441	Pper_target_448_genes_0_24147399
chr1	AATCCTCTTTCAAAATCTGCTTCCTTTCTCACTAATTTTT	+	13082189	13082228	13082229	13082689	13082253	13082254	Pper_target_449_genes_0_24147400
chr1	TAGAGTCATAAAAATATATGTGGTAATATTTCATAATTGA	+	13174525	13174564	13174565	13175025	13174569	13174570	Pper_target_450_genes_0_24147401
chr1	CCTTGAACTACCGTCCAGATTGCCCATAGTTATCGTCAGC	+	13321505	13321544	13321545	13322005	13321567	13321569	Pper_target_451_genes_0_24147402
chr1	AAATTATGTCATGAGTTTAACTTTATGAATATGATTAATG	+	13325496	13325535	13325536	13325996	13325541	13325542	Pper_target_452_genes_0_24147403
chr1	TTAATTTAAATATTAAACATTTAAATAGTTTAAACTTTAC	+	13405931	13405970	13405971	13406431	13405990	13405991	Pper_target_453_genes_0_24147404
chr1	GGACTTATCTAAATACGATCATAAAAAGTATGATGCCATG	+	13439809	13439848	13439849	13440309	13439868	13439869	Pper_target_455_genes_0_24147406
chr1	TTGGAATCTAAGCTCAGTCCTGCATCTGTCCATGATTTTG	+	13442835	13442874	13442875	13443335	13442882	13442883	Pper_target_456_genes_0_24147407
chr1	TTAACTATATTCATCATATTCTTTCTACTCCACCTCATGT	+	13446137	13446176	13446177	13446637	13446182	13446183	Pper_target_457_genes_0_24147408
chr1	TGATACTATCGATGACACTCAATCGTATATGGATTCTAAG	+	13449229	13449268	13449269	13449729	13449279	13449280	Pper_target_458_genes_0_24147409
chr1	TTAATTTTATAGATTTGAGGTTTAAGGATGTTAATGGAAA	+	13459725	13459764	13459765	13460225	13459781	13459782	Pper_target_459_genes_0_24147410
chr1	AATAGTTTTACATAAATACAAATAATATAATGAATAGAGT	+	13463198	13463237	13463238	13463698	13463262	13463263	Pper_target_460_genes_0_24147411
chr1	CTAGAAAGATCTTTGAGTTTATGATTGGAGAAGGGTATGC	+	13468739	13468778	13468779	13469239	13468791	13468792	Pper_target_461_genes_0_24147412
chr1	TAAATCTAAATATCTAATTATATATAAAAAATGATTTATG	+	13472373	13472412	13472413	13472873	13472424	13472425	Pper_target_462_genes_0_24147413
chr1	TATAATGTTAGTCAGCACCTTCTTTATTTCTATCGACACG	+	13560336	13560375	13560376	13560836	13560394	13560395	Pper_target_463_genes_0_24147414
chr1	TATGGACGATAAGGCACTTCTCCATTAGTAAAGAATTTAT	+	13563414	13563453	13563454	13563914	13563459	13563460	Pper_target_464_genes_0_24147415
chr1	TAGTTCCTTTTTGGTCTCATGGTTGAGATCTCGTGGTTAT	+	13567755	13567794	13567795	13568255	13567802	13567803	Pper_target_465_genes_0_24147416
chr1	TAAGCCATGGAAGACAGAGGAAGCGAGAGTAGCATCAACC	+	13570756	13570795	13570796	13571256	13570818	13570819	Pper_target_466_genes_0_24147417
chr1	TTCATATGTCCCTTGATTTGGGAATTCTTTGTGATTAAAG	+	13574257	13574296	13574297	13574757	13574309	13574310	Pper_target_467_genes_0_24147418
chr1	CTTGGCCTCATTTCAAGATATTATTCAAACATCTTATTGC	+	13579264	13579303	13579304	13579764	13579326	13579327	Pper_target_468_genes_0_24147419
chr1	TCCAAGAGAGTTTGGAATGGTCCCGGTTAGAGAATTGTTG	+	13582689	13582728	13582729	13583189	13582742	13582743	Pper_target_469_genes_0_24147420
chr1	CCTTGGTTCTTTTCAATTGCTTGCATTTGGGACATGGTTT	+	13617584	13617623	13617624	13618084	13617640	13617641	Pper_target_470_genes_0_24147421
chr1	TTTGGAGTCAAATCCTCACCTTCCATTTCTTCATCTTCTC	+	13635157	13635196	13635197	13635657	13635220	13635221	Pper_target_471_genes_0_24147422
chr1	ATAATCACCTTCAAGAATTCGATTTTTCCACTATATTCCT	+	13732936	13732975	13732976	13733436	13732976	13732977	Pper_target_472_genes_0_24147423
chr1	GGTCCATATGCACAAAAATCTCTCTAAATCTTTGAACAAC	+	13735964	13736003	13736004	13736464	13736019	13736020	Pper_target_473_genes_0_24147424
chr1	TTTGGGAAATCACCGCTCGGGGCTCTGGCTGATTATACAC	-	13739026	13739065	13738566	13739026	13739021	13739022	Pper_target_474_genes_0_24147425
chr1	ATGTATTGTTGTTGACTTCGTAGCAACCCACCAGCAAGTC	+	13764100	13764139	13764140	13764600	13764151	13764152	Pper_target_475_genes_0_24147426
chr1	AGAAACGTTAAGTTAAGTTTTTAGCTACCACTTACACCAG	-	13767179	13767218	13766719	13767179	13767164	13767165	Pper_target_476_genes_0_24147427
chr1	TGTTGCCAGAGATATGGGCGCTAGGATTACGTAATCCTTG	+	13770283	13770322	13770323	13770783	13770340	13770341	Pper_target_477_genes_0_24147428
chr1	GCATTGTAAGTCTTTTAGCTCCACGCAACTGGTCTTCTTC	-	13775315	13775354	13774855	13775315	13775295	13775296	Pper_target_478_genes_0_24147429
chr1	AGGGACAGAGAGACGATAAATTTGTATGTATGTTGTGATG	+	13779252	13779291	13779292	13779752	13779292	13779293	Pper_target_479_genes_0_24147430
chr1	TCATTGTATGGATTCTTGTGGCATTTTTGTCAATGTTTTG	+	13783392	13783431	13783432	13783892	13783456	13783457	Pper_target_480_genes_0_24147431
chr1	AGGTCGAACAGGTCGGCCACCGCCGCCGTGAATCAAATAG	+	13789712	13789751	13789752	13790212	13789768	13789769	Pper_target_481_genes_0_24147432
chr1	AAAAAGGTACAACTTTTCCTTTAATTTTCTGCAACTTTTG	+	13809008	13809047	13809048	13809508	13809059	13809060	Pper_target_482_genes_0_24147433
chr1	AACTATAATGAGAATTACGTTTGATTTGAAATGCCACAAG	+	13812094	13812133	13812134	13812594	13812148	13812149	Pper_target_483_genes_0_24147434
chr1	TTATTTTATTGTACTTACTAATTTACTATTATTAAATTTC	+	13815325	13815364	13815365	13815825	13815374	13815375	Pper_target_484_genes_0_24147435
chr1	TCCTATAGTATATACCATTTGCATAGATTGGAATTGTTTG	+	13842428	13842467	13842468	13842928	13842475	13842476	Pper_target_486_genes_0_24147437
chr1	GACAAAAAAGTGGAACAAGGTACATTTTTGTGTAAAAGAC	+	13845422	13845461	13845462	13845922	13845481	13845482	Pper_target_487_genes_0_24147438
chr1	ATTTTTTGCAATTTCGTTATACGTGAGGGTGTTTTTTTGC	+	13848602	13848641	13848642	13849102	13848657	13848658	Pper_target_488_genes_0_24147439
chr1	CAATTTCTTTGATTTTGTCAAACAAAAACAGCTTTTATTG	+	13879338	13879377	13879378	13879838	13879397	13879398	Pper_target_489_genes_0_24147440
chr1	GCACGGGCAGCGCGGTCATTGGGCAGCCTATTCTTTCTTC	+	13887912	13887951	13887952	13888412	13887955	13887956	Pper_target_490_genes_0_24147441
chr1	TGGCGACTCCACTCCGTTTGGCCTTATAGGCTTCATCGAC	+	13891045	13891084	13891085	13891545	13891089	13891090	Pper_target_491_genes_0_24147442
chr1	TCAAAATCTCAACTTAATTTGGGTTTTAGGTACAAGGAAA	+	13916020	13916059	13916060	13916520	13916077	13916078	Pper_target_492_genes_0_24147443
chr1	GAAGTATTAATCATGTAAGAAATTGTTAGAATTTGAGGTC	+	14017411	14017450	14017451	14017911	14017470	14017471	Pper_target_494_genes_0_24147445
chr1	AGAACGTGTTCTGTTTTGTTGACACAGGGAACAGGAAAAA	+	14050520	14050559	14050560	14051020	14050581	14050582	Pper_target_495_genes_0_24147446
chr1	TTTGACTATTAATGCACTCAAATCAACCAAAGAGCCATGA	+	14414736	14414775	14414776	14415236	14414782	14414783	Pper_target_499_genes_0_24147450
chr1	TTATTTTTTAGAAGTCTTCTGAATCAAAAAAACTCTGTGC	+	14444575	14444614	14444615	14445075	14444626	14444627	Pper_target_500_genes_0_24147451
chr1	CCCCAAGACTCTAACTCATTATTTTGTTCATTTGTTATGG	+	14559585	14559624	14559625	14560085	14559625	14559626	Pper_target_501_genes_0_24147452
chr1	AGCCGATCGATCGTCGTCTTCATCGCCCGTCGTGATTTCT	+	14817018	14817057	14817058	14817518	14817066	14817067	Pper_target_502_genes_0_24147453
chr1	CCTTCTTTATCTTAATTTAGTTACTTAAGTGATATCAATC	+	14847947	14847986	14847987	14848447	14848006	14848007	Pper_target_504_genes_0_24147455
chr1	CCCAACTATGCTAGAAACTATGTTTATGTTATGTTATGTC	-	15543869	15543908	15543409	15543869	15543860	15543861	Pper_target_507_genes_0_24147458
chr1	GGTTTAGGGTTGTGTAAAATATATCGGTAACAAGATTATG	+	15746713	15746752	15746753	15747213	15746754	15746755	Pper_target_508_genes_0_24147459
chr1	ATTCCTATTCCTACCACAACCCCATTATCAACTTCTATAC	+	15847365	15847404	15847405	15847865	15847419	15847420	Pper_target_509_genes_0_24147460
chr1	GCATGGCTCGAAAATCCTCTGTACGGATTGAGAGCTGGAG	+	15942103	15942142	15942143	15942603	15942149	15942150	Pper_target_510_genes_0_24147461
chr1	TAATTTTATACTTGTTTAGTTGTTATAAGGACCTAAGTTT	+	15952895	15952934	15952935	15953395	15952935	15952936	Pper_target_511_genes_0_24147462
chr1	GTGACGAAGAAGAAGATTGGAAAGAGAGTCAAAAAGAGAG	+	16267676	16267715	16267716	16268176	16267736	16267737	Pper_target_513_genes_0_24147464
chr1	TGGATTGGTGCTAATACTTGAACCTATCACGATGGAAGGA	+	17001510	17001549	17001550	17002010	17001560	17001561	Pper_target_515_intergenic_0_24147466
chr1	AGCTGATGGGTTGTTCACCATTATAGGATCGAAGGTAGTG	+	17181911	17181950	17181951	17182411	17181953	17181954	Pper_target_516_genes_0_24147467
chr1	TCTATATTACAACTGATGTATCATGTTATCGTCTTCACTG	+	17239853	17239892	17239893	17240353	17239916	17239917	Pper_target_517_genes_0_24147468
chr1	TTGACATCTAAAGAATGGGAATCTTGAGTGACAGAAGAAG	+	17243055	17243094	17243095	17243555	17243101	17243103	Pper_target_518_genes_0_24147469
chr1	ATATATATATATAAAAAGGGTGTATTTTAAATCATTTTAG	+	17252213	17252252	17252253	17252713	17252254	17252255	Pper_target_520_genes_0_24147471
chr1	TTAATGTTTGCTTAGTTTTGAGTTAACTATGGATTTAAGG	+	17258306	17258345	17258346	17258806	17258365	17258366	Pper_target_521_genes_0_24147472
chr1	AATCAACAAATTATGTGTTTGTGGTGGTTGATCACTTCTC	+	17288668	17288707	17288708	17289168	17288709	17288710	Pper_target_522_genes_0_24147473
chr1	CAAGCTTCAGTTGCATCTCTACAAGTTCAGTCAGTAATGC	+	17292182	17292221	17292222	17292682	17292244	17292245	Pper_target_523_genes_0_24147474
chr1	TATAAGAATAAGATGCTCACTAACAAAATCAAATTAAAAA	+	17295858	17295897	17295898	17296358	17295916	17295917	Pper_target_524_genes_0_24147475
chr1	GCGACCGTCATGCAGAAAATCAAAGATATCGAAGATGAGG	+	17307831	17307870	17307871	17308331	17307875	17307876	Pper_target_525_genes_0_24147476
chr1	CAAAGTTTGTTAAGCCTTCTGGTGATGATGGTTGAGTCAG	+	17310931	17310970	17310971	17311431	17310983	17310984	Pper_target_526_genes_0_24147477
chr1	AATAATTGACATCAGTGAAACTAGGTAATTGTCACCCTTC	+	17315869	17315908	17315909	17316369	17315923	17315924	Pper_target_527_genes_0_24147478
chr1	CTCGTGATAATATAAGTGCAACATAATTTGACAGAATTGG	+	17319337	17319376	17319377	17319837	17319394	17319395	Pper_target_528_genes_0_24147479
chr1	TGGTTTTTTATTGTTGATTTTAGGTGCAGAAAAGACGAAG	+	17322944	17322983	17322984	17323444	17322990	17322991	Pper_target_529_genes_0_24147480
chr1	TTTTGGTCTTGGAAATTGGAATCGAGTATGCAAAGTAGGG	+	17342963	17343002	17343003	17343463	17343022	17343023	Pper_target_530_genes_0_24147481
chr1	GATTTCGATATATGCAGTCCATCGTCAACACAGAAGAATC	-	17346052	17346091	17345592	17346052	17346028	17346029	Pper_target_531_genes_0_24147482
chr1	TTCGCTAACGTCCGTTACCCTCCGCCGCAACTCCTTTCAC	+	17349744	17349783	17349784	17350244	17349793	17349794	Pper_target_532_genes_0_24147483
chr1	ATCAAATTCAATTTGTTTTTGTTTTTTCACTCTAAAAAAC	+	17582181	17582220	17582221	17582681	17582240	17582241	Pper_target_535_genes_0_24147486
chr1	CCCACAGATGAAGAACCGTTTGCACCGAACAACCCTAAAG	+	17585318	17585357	17585358	17585818	17585374	17585375	Pper_target_536_genes_0_24147487
chr1	AAATCTCGACTTGTGATTCGAGTTTATGTGATTTGATCTG	+	17606152	17606191	17606192	17606652	17606205	17606206	Pper_target_537_genes_0_24147488
chr1	AGGGAATTGTTACTTTCATAAAAAGTTTTAAAAATAGTCG	+	17610195	17610234	17610235	17610695	17610244	17610245	Pper_target_538_genes_0_24147489
chr1	TATGTTTAAGTTGCTTAGTTTGTTTGCTTATTATGTGTTG	+	17667528	17667567	17667568	17668028	17667588	17667589	Pper_target_539_genes_0_24147490
chr1	CCACCGCCGGACACGTGACAGGAAAATACGGCAAGATTCC	+	17670703	17670742	17670743	17671203	17670757	17670758	Pper_target_540_genes_0_24147491
chr1	TACCTATATATAGCCTACCAACAAGATCAAATAAAAGGAT	+	17676334	17676373	17676374	17676834	17676374	17676375	Pper_target_541_genes_0_24147492
chr1	CGTCCCTTGGATCGATCTCCCCTTCTTCCATACCGTCTTC	+	17722579	17722618	17722619	17723079	17722641	17722642	Pper_target_542_genes_0_24147493
chr1	CCTTGAAGGAGAGTGTGTGAGCCCTAGACTGGCTAGGTGC	+	17860684	17860723	17860724	17861184	17860739	17860740	Pper_target_543_genes_0_24147494
chr1	AGACCATACATCAGTCCTTTCATCAATGTCTGCTTGACTC	+	17898294	17898333	17898334	17898794	17898335	17898336	Pper_target_546_genes_0_24147497
chr1	AAACATATAACCAGGAAGTAGACAAACAGGCAGATCCTAC	+	17901509	17901548	17901549	17902009	17901563	17901564	Pper_target_547_genes_0_24147498
chr1	TAACTTATTAGACAATATTTAATTATGCATTTAAATCATG	+	17934582	17934621	17934622	17935082	17934635	17934636	Pper_target_548_genes_0_24147499
chr1	TCCCAGTTATATTTTGAAGGTTAGCTCCTCAATTTACTGT	+	17937629	17937668	17937669	17938129	17937669	17937670	Pper_target_549_genes_0_24147500
chr1	ACTGATAAATTCAAGTGCATAAACAAAGAAAGATACAAAC	+	17941207	17941246	17941247	17941707	17941265	17941266	Pper_target_550_genes_0_24147501
chr1	AAAAAATACTATGAAATTCACTTTGTGTACTTCTTGAAAA	+	17944302	17944341	17944342	17944802	17944383	17944384	Pper_target_551_genes_0_24147502
chr1	TAGAAATTTCAGTTGGAGCAAAACTATCCGCAATAGATAC	+	17947619	17947658	17947659	17948119	17947679	17947680	Pper_target_552_genes_0_24147503
chr1	GAATCAGACTTCGTCCTCAAAGTCTGTATCCGTAAATAAC	+	17950915	17950954	17950955	17951415	17950968	17950969	Pper_target_553_genes_0_24147504
chr1	AAATAAAATAATGATTCGATATTTGATTTCAAGAACGATT	+	17965167	17965206	17965207	17965667	17965226	17965227	Pper_target_554_genes_0_24147505
chr1	TTCTAACTTAATAACTTCAAAAAGTATTTTCATGCTTACC	+	17985480	17985519	17985520	17985980	17985539	17985540	Pper_target_556_genes_0_24147507
chr1	ACTTTCGTTGAAAAAAATAAGTGTGATTATATGGATATGG	+	17988763	17988802	17988803	17989263	17988818	17988819	Pper_target_557_genes_0_24147508
chr1	AAGGTACATGTATGCATTCCTCCTATCTTATTCCCTAAAC	+	17991893	17991932	17991933	17992393	17991938	17991939	Pper_target_558_genes_0_24147509
chr1	TCTAAAACATCAATTTTAAATGTATGGAATTTGAATTTTG	+	18008431	18008470	18008471	18008931	18008484	18008485	Pper_target_559_genes_0_24147510
chr1	GTCAAAAGGCAAGAAAATGACCTAAAACCCATGTAAGTTC	+	18035704	18035743	18035744	18036204	18035745	18035746	Pper_target_560_genes_0_24147511
chr1	TGCCATAAACCCAACGTCAGCCACGCTGAACCTCACAAAC	+	18040706	18040745	18040746	18041206	18040762	18040763	Pper_target_561_genes_0_24147512
chr1	CTAACGATTGTGCTTGAAACATTAAGAGTTTTTGTTGCTG	+	18127995	18128034	18128035	18128495	18128049	18128050	Pper_target_562_genes_0_24147513
chr1	CATAAAAATTATAACCTGACATCAATGTTTTAAAACCCGG	-	18131870	18131909	18131410	18131870	18131849	18131850	Pper_target_563_genes_0_24147514
chr1	CAAGTCAAATGATATGAACTATGAAGTGACAAAATATACG	+	18158920	18158959	18158960	18159420	18158980	18158981	Pper_target_565_genes_0_24147516
chr1	GTCAAGTAAACTTCTTTTTGATTCACAATGCGTACACAAG	+	18162066	18162105	18162106	18162566	18162121	18162122	Pper_target_566_genes_0_24147517
chr1	ACCATTAACCGACTCAACAGCCTTGAACATGATTGTAAAC	+	18186808	18186847	18186848	18187308	18186866	18186867	Pper_target_568_genes_0_24147519
chr1	TCCCATCAGTTTTATTTTTACATATATTGCATGCTCCTAC	+	18208936	18208975	18208976	18209436	18208984	18208985	Pper_target_569_genes_0_24147520
chr1	AATAGGTTGTCCTGTAGTATTATGTTATTTTACTGCTTTC	+	18212746	18212785	18212786	18213246	18212820	18212821	Pper_target_570_genes_0_24147521
chr1	CGGTAATCGGGTACGAGCCAAATATGCTTGATTTTGAAAC	+	18222559	18222598	18222599	18223059	18222604	18222605	Pper_target_571_genes_0_24147522
chr1	TGTTTATTATGAAAATATTATTTATTTTAACAAGATGTTT	+	18242435	18242474	18242475	18242935	18242478	18242479	Pper_target_572_genes_0_24147523
chr1	GGTGGGTATCTCTATAATATTCCACAAACCTCAGCCTTCC	+	18245485	18245524	18245525	18245985	18245543	18245544	Pper_target_573_genes_0_24147524
chr1	ATCACTAGGCGACGACGACGACGATCGTTTCACTTTTATG	+	18407104	18407143	18407144	18407604	18407152	18407153	Pper_target_575_genes_0_24147526
chr1	ATATATTAATTGTAATAAATATTTTAAAACCTAAGTCACC	+	18578903	18578942	18578943	18579403	18578944	18578945	Pper_target_576_genes_0_24147527
chr1	GAGCAACATTAACAGATCCCGGTGTTATCACACTTACTTC	+	18674905	18674944	18674945	18675405	18674955	18674956	Pper_target_577_genes_0_24147528
chr1	TTTTTTATATCAGAGCAAAATACAGGAAACTACAGCATAC	+	18677919	18677958	18677959	18678419	18677961	18677962	Pper_target_578_genes_0_24147529
chr1	AGATGTTATGAAGCTAGAGCTTTGAAACCACCTCAGTATG	+	18684871	18684910	18684911	18685371	18684923	18684924	Pper_target_579_genes_0_24147530
chr1	AGAAGGTGTCCCTCCAGCTGGGGCGCATGGTTTGTGATTC	+	18688024	18688063	18688064	18688524	18688072	18688073	Pper_target_580_genes_0_24147531
chr1	ATAAACAATATACTAGAAACTTTTTGTGGGTATTCTTTTA	+	18691253	18691292	18691293	18691753	18691316	18691317	Pper_target_581_genes_0_24147532
chr1	TTCATATTATCAATGACCAATATGTCCTCCATGTTTATTA	+	18707291	18707330	18707331	18707791	18707351	18707352	Pper_target_582_genes_0_24147533
chr1	AAAAAATACATTTTCGTATGATAGGTTATTACGTTGTTAT	+	18718430	18718469	18718470	18718930	18718489	18718490	Pper_target_583_genes_0_24147534
chr1	ATAATAATCAAAAGGTATCGTGTTACCAACTAACAAAGAG	+	18742352	18742391	18742392	18742852	18742415	18742416	Pper_target_585_genes_0_24147536
chr1	AGCAAGTAAGGTGGCTCAAGTTTTAGTAATTAGCATTTAG	+	18745562	18745601	18745602	18746062	18745619	18745620	Pper_target_586_genes_0_24147537
chr1	GTTCACCTCGTGAGTTTCTAATATTCACCTCGTGAAGACG	+	18771618	18771657	18771658	18772118	18771672	18771673	Pper_target_587_genes_0_24147538
chr1	ATTGCTGTTTATTACGGAAGTTAAGCTATCTTGGAAAGTC	+	18775352	18775391	18775392	18775852	18775413	18775414	Pper_target_588_genes_0_24147539
chr1	AGGCGAGAAGTCGATGAAGTGAAAGAATTGATCATTATAG	+	18778550	18778589	18778590	18779050	18778590	18778591	Pper_target_589_genes_0_24147540
chr1	TTGTCAAGATTGTGGCAACCAAGCAAAGAAAGATTGTCAG	+	18919505	18919544	18919545	18920005	18919550	18919551	Pper_target_590_genes_0_24147541
chr1	TGCTATAACTTATACTCTTCCTAATGTGAACTTTGCGTTG	+	18973704	18973743	18973744	18974204	18973756	18973757	Pper_target_591_genes_0_24147542
chr1	TTTTTGTCAAAACACTGACATTTTTAGATCGGTGGTCCTT	-	18976859	18976898	18976399	18976859	18976844	18976845	Pper_target_592_genes_0_24147543
chr1	CTTCTGCCTTTCAAGAGATAGTAGATGCTTATGGGTAAGT	+	18980495	18980534	18980535	18980995	18980559	18980560	Pper_target_593_genes_0_24147544
chr1	AACCCTCTAAAAAGATGCCAACACTAGAAAGATTCTTCAC	+	18983645	18983684	18983685	18984145	18983702	18983703	Pper_target_594_genes_0_24147545
chr1	AAATCACTTTTTCTTCTGATTTTTGCTATGGTTTTTACTC	+	18992617	18992656	18992657	18993117	18992660	18992661	Pper_target_595_genes_0_24147546
chr1	TTTTTTAACAGTTTTAAACACCCATCATCAAAGATTTATT	+	19017350	19017389	19017390	19017850	19017404	19017405	Pper_target_596_genes_0_24147547
chr1	AATCATATTGAAAGTCCTTTGAGGCTTTGGCATATGGAAC	+	19020790	19020829	19020830	19021290	19020850	19020851	Pper_target_597_genes_0_24147548
chr1	AATACCTTTGTAGTCGCAACTCACAATGAACTATTTTACG	+	19041639	19041678	19041679	19042139	19041692	19041693	Pper_target_598_genes_0_24147549
chr1	AATAGGTGATCTTGGTCAAACATTTGACTCGAATCGGACT	+	19048032	19048071	19048072	19048532	19048091	19048092	Pper_target_599_genes_0_24147550
chr1	ACGAGTATGTTGCTCAAAATATCTGACTTGAGTGGAGTAG	+	19058420	19058459	19058460	19058920	19058464	19058465	Pper_target_601_genes_0_24147552
chr1	TGCTATTGTTGTTAATCTGTAAGATTTGTGCTTGTCTGTT	-	19228029	19228068	19227569	19228029	19228002	19228003	Pper_target_602_genes_0_24147553
chr1	AAAGCATTAGAAAATATAACATATTAAAAAAACATTCAGG	+	19242439	19242478	19242479	19242939	19242494	19242495	Pper_target_603_genes_0_24147554
chr1	CGGTGGAGATGACAGAGAAGAATACACTTGTAATGGAGTG	+	19247971	19248010	19248011	19248471	19248034	19248035	Pper_target_604_genes_0_24147555
chr1	CTATATTGAACTCACCGTGAAGTAACTACAGGAATAAATG	-	19252847	19252886	19252387	19252847	19252836	19252837	Pper_target_605_genes_0_24147556
chr1	CATTATGACATCATAACTTTTGCATGGAGGGGGTAGAAGG	+	19318775	19318814	19318815	19319275	19318816	19318817	Pper_target_606_genes_0_24147557
chr1	TTCAAGTCTTTGCAAGTCTTGGTGATGATTAATGCGAAAT	+	19524220	19524259	19524260	19524720	19524264	19524265	Pper_target_607_intergenic_0_24147558
chr1	ATCATAGTTTATATGATTATTCATGTATAACCCTGAATTG	+	19741579	19741618	19741619	19742079	19741624	19741625	Pper_target_609_intergenic_0_24147560
chr1	ATGGAATTATATTTCATTGCAATGTTCTTGAAAGAATTTG	+	19857684	19857723	19857724	19858184	19857741	19857742	Pper_target_610_genes_0_24147561
chr1	TGATGAAGCACTGACGTTAGAGCGGTTGAGTGATGAGAAC	+	19860975	19861014	19861015	19861475	19861023	19861024	Pper_target_611_genes_0_24147562
chr1	TAATTTAACAAATATAAAAATGTCAAAATGTTCTTGATTC	+	19867320	19867359	19867360	19867820	19867361	19867362	Pper_target_612_genes_0_24147563
chr1	TGGATATATATTTACCCATCTTTGGATTCACCTCATGATA	+	19878523	19878562	19878563	19879023	19878566	19878567	Pper_target_613_genes_0_24147564
chr1	TTTCCTTGTTAAATTAGGTATTACCACCAACTTCTAAAGG	+	19904267	19904306	19904307	19904767	19904331	19904332	Pper_target_614_genes_0_24147565
chr1	ATAAGATTTTGATAAATTACATTATTTAAATATATTAATG	+	19907338	19907377	19907378	19907838	19907393	19907394	Pper_target_615_genes_0_24147566
chr1	AGAAGCCATGGGTTTTGGGGATTTGATTTATATCTTAGAG	+	19910559	19910598	19910599	19911059	19910602	19910603	Pper_target_616_genes_0_24147567
chr1	TGCCCGATAATTTTCCAATAGTTTGCTAATTACACATGAC	+	19913620	19913659	19913660	19914120	19913681	19913682	Pper_target_617_genes_0_24147568
chr1	AATTTCAATTGGTTTAAACATTCGGATCCTGGAAACAACG	+	20024631	20024670	20024671	20025131	20024680	20024681	Pper_target_618_genes_0_24147569
chr1	CTTTGTTACAAAAATCATCATATTCTCCTTTATCTCCAAC	+	20029056	20029095	20029096	20029556	20029118	20029119	Pper_target_619_genes_0_24147570
chr1	CTTTTGGAGTTGGTAGATGAATTTCTTGTTAATGTGTCTA	+	20063661	20063700	20063701	20064161	20063713	20063714	Pper_target_620_genes_0_24147571
chr1	GTTAGGACATGGTTGTGATATTCATCATCTCTAACTAAAC	+	20067223	20067262	20067263	20067723	20067281	20067282	Pper_target_621_genes_0_24147572
chr1	GGGATCTTAGAAGTCGAGGGTTGTGCCTAGTGCCATTATC	+	20072267	20072306	20072307	20072767	20072327	20072328	Pper_target_622_genes_0_24147573
chr1	TAGGATTTTTTTATTAAGAAGAAAGATTCTTAGTTTATGG	+	20108826	20108865	20108866	20109326	20108867	20108868	Pper_target_624_genes_0_24147575
chr1	TTAGTTCCAATGTAGATTTGTTTCCATTTTTAATTGATAG	+	20111840	20111879	20111880	20112340	20111889	20111890	Pper_target_625_genes_0_24147576
chr1	TGAGACTTGGTCGTTGAAGTTGAAGTGTTATTTGTTAGTC	+	20117381	20117420	20117421	20117881	20117428	20117429	Pper_target_626_genes_0_24147577
chr1	ATAAAGAAGGAAGGCCTATTTATATAGAGTTATTAGGAAA	+	20120686	20120725	20120726	20121186	20120726	20120727	Pper_target_627_genes_0_24147578
chr1	GGCGCCTGCTACTAAGCCCAAGGCAGCCGCCAAAACTAAG	+	20124065	20124104	20124105	20124565	20124127	20124128	Pper_target_628_genes_0_24147579
chr1	GAGTGTTGTATGGTCACAAATTTAAAACAACACGGAGCAC	+	20194787	20194826	20194827	20195287	20194846	20194847	Pper_target_630_genes_0_24147581
chr1	CCGCCTGCTTGATTACCATTACAGTTGTCACTTCTGACTC	+	20348893	20348932	20348933	20349393	20348944	20348945	Pper_target_631_genes_0_24147582
chr1	GTTTTGATCGGAAAAATGGGCCACACCACCATGGCTGCAA	-	20352457	20352496	20351997	20352457	20352433	20352434	Pper_target_632_genes_0_24147583
chr1	TAGCCATCTCACATGATAGCTTCAACACCTCCGTCAAGTC	+	20617973	20618012	20618013	20618473	20618029	20618030	Pper_target_634_genes_0_24147585
chr1	AACACTAAAGAAGTCTAGACTAACTGAATACTTGTGTCCC	-	20621332	20621371	20620872	20621332	20621311	20621312	Pper_target_635_genes_0_24147586
chr1	AGCTGTAATTAAATTGATGTTCTCTTTTTAGGTGGAAAAC	+	20916825	20916864	20916865	20917325	20916880	20916881	Pper_target_639_genes_0_24147590
chr1	TCTTCTCTGCAGAGAAATCCCACACAGAGACCAGCAACAG	+	20939202	20939241	20939242	20939702	20939253	20939254	Pper_target_640_genes_0_24147591
chr1	CATGCACTCCATTTTTCTATATTGGATTCGCCACCTTGTG	+	20942575	20942614	20942615	20943075	20942619	20942620	Pper_target_641_genes_0_24147592
chr1	ACCAAAACCACCTGTGGAACCATCAACAACACCACCAGAA	+	20945753	20945792	20945793	20946253	20945795	20945796	Pper_target_642_genes_0_24147593
chr1	AGTTTGAAACACGAAGGAATCGTCAATAACTAAGAACACG	-	20951430	20951469	20950970	20951430	20951423	20951424	Pper_target_643_genes_0_24147594
chr1	CAACTCGTCGAGTTGGCTCATCAACTCGTCGAGTCTGCCA	-	20960189	20960228	20959729	20960189	20960186	20960187	Pper_target_644_genes_0_24147595
chr1	AGCACGTATAAATTTTGGTAGTGCTTCACTAATCGAGTCC	+	20966861	20966900	20966901	20967361	20966903	20966904	Pper_target_645_genes_0_24147596
chr1	ATATTTAATAGGTAAAAATATGTATTATTTTGTATAAAGA	+	20997708	20997747	20997748	20998208	20997759	20997760	Pper_target_646_genes_0_24147597
chr1	GGCTTATACAAATCGCTTATGCAAATCAAATCTGAGTACG	+	21049215	21049254	21049255	21049715	21049276	21049277	Pper_target_647_genes_0_24147598
chr1	CATTGAAGATTTAAAGGAGCTGAGATGGCTAGAATATTGG	+	21213210	21213249	21213250	21213710	21213256	21213257	Pper_target_649_genes_0_24147600
chr1	TGGACCATATTTTTGGCCTTGGTAGCTTGTTTAGCTTTGG	-	21229592	21229631	21229132	21229592	21229589	21229590	Pper_target_650_genes_0_24147601
chr1	CACCAAGTTTAATGGCTTCTCTGAAATTTTGATTGTGTTC	+	21266661	21266700	21266701	21267161	21266717	21266718	Pper_target_651_genes_0_24147602
chr1	CTAATTATTTTAGGGTTTCTTTTAGATTCGCTAGATTTTC	+	21302638	21302677	21302678	21303138	21302679	21302680	Pper_target_652_genes_0_24147603
chr1	GTATTATTTTCATCAATTTGAGAGATTCTTACCTCAAAAG	+	21351918	21351957	21351958	21352418	21351973	21351974	Pper_target_653_genes_0_24147604
chr1	GGTCCGTCTACATTTTCATTTTCTACCCCACTGGTAACTG	+	21354974	21355013	21355014	21355474	21355036	21355037	Pper_target_654_genes_0_24147605
chr1	AATCCAAAACCAACATATGTGATTGATTGATAATCCAAAC	+	21358060	21358099	21358100	21358560	21358119	21358120	Pper_target_655_genes_0_24147606
chr1	TTGAAATATTTTGGATCTCATGGTTTGCATGTATTCGGTA	+	21361113	21361152	21361153	21361613	21361163	21361164	Pper_target_656_genes_0_24147607
chr1	AAATTTGCACTTGCTAAGCAACAGTGACCCCACTCTGAAG	+	21364963	21365002	21365003	21365463	21365016	21365017	Pper_target_657_genes_0_24147608
chr1	TTCTTTTATTTATTTATTTTGATTTTATCACTTCCAGTCG	+	21386182	21386221	21386222	21386682	21386232	21386233	Pper_target_659_genes_0_24147610
chr1	CAAATCAGATTCGTTATGGTCCGTATGGTAATTCTGATAA	+	21389396	21389435	21389436	21389896	21389450	21389451	Pper_target_660_genes_0_24147611
chr1	AGTATTTCACGAAATGTATAGAAAATCATGAAATAAAGTC	+	21394646	21394685	21394686	21395146	21394702	21394703	Pper_target_661_genes_0_24147612
chr1	TTTGGTGGAGATGGTGGCAACAAAACTGACATGGTAATTC	+	21397671	21397710	21397711	21398171	21397712	21397713	Pper_target_662_genes_0_24147613
chr1	TACATCACAACAAATTGGAGGTTTAAATCAGAAAAGATAG	+	21425677	21425716	21425717	21426177	21425722	21425723	Pper_target_663_genes_0_24147614
chr1	CTACCAAAGCAGATGCAGAGTGATTGCCTACCCTCTTTTT	+	21459976	21460015	21460016	21460476	21460037	21460038	Pper_target_664_genes_0_24147615
chr1	AGTATATGTTATATTTGTCGTGTATTTCGTTTTTAATTCG	-	21497873	21497912	21497413	21497873	21497857	21497858	Pper_target_666_genes_0_24147617
chr1	AAATTAATTACCTTGGTAAGTCATTTTCCCGTTTTTTATC	+	21500984	21501023	21501024	21501484	21501033	21501034	Pper_target_667_genes_0_24147618
chr1	CAAATTTTGATCATATATGAAAGATTACAAAAAAATTTGA	-	21520268	21520307	21519808	21520268	21520255	21520256	Pper_target_668_genes_0_24147619
chr1	TCCCAATTACCGCCTACTTTTCGGTAACTCTGCCGACATC	+	21523420	21523459	21523460	21523920	21523481	21523482	Pper_target_669_genes_0_24147620
chr1	GATAAGAATATTCCGGATCATCGCCCTATTCTCTTATTGG	-	21564842	21564881	21564382	21564842	21564834	21564835	Pper_target_670_genes_0_24147621
chr1	GTTTTTTACTAGTTTACTAAAAGGCTGAGTCTAACCAAGG	+	21570051	21570090	21570091	21570551	21570105	21570106	Pper_target_671_genes_0_24147622
chr1	TTGGCATCTTTCACTCCGGTGTAGAAGGTATGCTTTTCTG	+	21662626	21662665	21662666	21663126	21662672	21662673	Pper_target_672_genes_0_24147623
chr1	ACATTCAGTTTATATTACCACAAACTTAAATGGATTTAAA	+	21665880	21665919	21665920	21666380	21665927	21665928	Pper_target_673_genes_0_24147624
chr1	GTTACCTTCTAGGTCATTTGCCATTTTCAAAACAGATTAC	+	21678356	21678395	21678396	21678856	21678417	21678418	Pper_target_675_genes_0_24147626
chr1	GTTATCCGCTTTACTTCCTAACAAATGATATTAGTGCTAC	+	21741458	21741497	21741498	21741958	21741520	21741521	Pper_target_676_genes_0_24147627
chr1	ACCGGTGACTCTTCATACTTACAGGTATTTCTTGATCTTC	+	21745932	21745971	21745972	21746432	21745991	21745992	Pper_target_677_genes_0_24147628
chr1	ATCACACATCACTATCTACACATGTTTTACCACTACTAGA	+	21756964	21757003	21757004	21757464	21757028	21757029	Pper_target_678_genes_0_24147629
chr1	CCCTGTCGTCATCCACGCCGAGCAGAAGCAAGAACGAAGC	+	21862478	21862517	21862518	21862978	21862524	21862525	Pper_target_679_genes_0_24147630
chr1	TCCCAAGCCTCCGTGCCCACGGCTTACATCCGACTCACAA	+	22052566	22052605	22052606	22053066	22052616	22052617	Pper_target_682_genes_0_24147633
chr1	AAAATCCATAAGAGATTTCAATACCAAATTACGAAATAAT	+	22056691	22056730	22056731	22057191	22056754	22056755	Pper_target_683_genes_0_24147634
chr1	TTTTTTTGGATAAATAAGTCAAACGAATGAAGTATAAAAA	+	22059930	22059969	22059970	22060430	22059974	22059975	Pper_target_684_genes_0_24147635
chr1	TATTGTTTTTGAGAATGAATTATTCTCAATGCTTTTTAAG	+	22063140	22063179	22063180	22063640	22063199	22063200	Pper_target_685_genes_0_24147636
chr1	CCTCAAGCAACGAATATTGATTTCAGGGTGCATCGCGTTC	+	22066699	22066738	22066739	22067199	22066759	22066760	Pper_target_686_genes_0_24147637
chr1	ATATTTGTACATTCATATCTCGAATCATTTATGTGTATTA	+	22151463	22151502	22151503	22151963	22151527	22151528	Pper_target_687_genes_0_24147638
chr1	AAACAAGTTCCGAACATTTTCAGGATTCCACTCACCCAAA	+	22223556	22223595	22223596	22224056	22223597	22223598	Pper_target_689_genes_0_24147640
chr1	ATTCAATAAGTTATAATATGAGTTTATTATTGGGTATTTG	+	22285799	22285838	22285839	22286299	22285839	22285840	Pper_target_690_genes_0_24147641
chr1	TCCGAAAGCTTCTTCTCTAACGCAAACCTTTTCCCTTGAC	+	22289773	22289812	22289813	22290273	22289831	22289832	Pper_target_691_genes_0_24147642
chr1	ATGATATTCAATTTGGATAAGTACCCGTGAATCTTGAATA	+	22324809	22324848	22324849	22325309	22324855	22324856	Pper_target_693_genes_0_24147644
chr1	CAGGTTTTGCAGGGGCTTGAGGCAGCCTCAGTCTGTGTTG	+	22330265	22330304	22330305	22330765	22330314	22330315	Pper_target_694_genes_0_24147645
chr1	TAATATATATTGTTTAGTTTTACTTTTATTAGTAAAAAAA	+	22333324	22333363	22333364	22333824	22333383	22333384	Pper_target_695_genes_0_24147646
chr1	GATGTTTTACCTCTTGAGATTTTACTGCATGTATGTTTAG	+	22337097	22337136	22337137	22337597	22337142	22337143	Pper_target_696_genes_0_24147647
chr1	ACCTGTAAAATTGATTGAAAGAAGATAAAATTTTAGCCTC	+	22340104	22340143	22340144	22340604	22340163	22340164	Pper_target_697_genes_0_24147648
chr1	CTCCAAAACAAAATTGAATTATGATGGAATGTATCCATAG	-	22356827	22356866	22356367	22356827	22356812	22356813	Pper_target_699_genes_0_24147650
chr1	TACACTTTTTAAGGCACATAGTTAGTAATAAAGAAATTCA	+	22362564	22362603	22362604	22363064	22362626	22362627	Pper_target_700_genes_0_24147651
chr1	GTGATTTCTTCTTCATGGCATCCGATGAGATCGCCGGTGT	+	22388512	22388551	22388552	22389012	22388568	22388569	Pper_target_701_genes_0_24147652
chr1	AAAAAAATCCAAAGGATGAAGAAGAAACACCAGAATCAAC	+	22408844	22408883	22408884	22409344	22408897	22408898	Pper_target_702_genes_0_24147653
chr1	CGGGGCGTACCGAGTAGAATGGTCGCGGGTGAGCCTTGAG	+	22437087	22437126	22437127	22437587	22437150	22437151	Pper_target_703_genes_0_24147654
chr1	GTGAATTAACTAACATGAAAGTTCGAGGTTTTGTAAAATG	+	22480936	22480975	22480976	22481436	22480993	22480994	Pper_target_704_genes_0_24147655
chr1	GTCACCCCACATAATGTAATTTGTTTCATATGCTTGATAG	+	22484045	22484084	22484085	22484545	22484093	22484094	Pper_target_705_genes_0_24147656
chr1	ATTAAGACTCTTAATTATCCTTACCAATCTAACTAATATG	+	22487054	22487093	22487094	22487554	22487094	22487095	Pper_target_706_genes_0_24147657
chr1	ATTTTTTCTCTCTGCTCCCTTAACCAATCTTCCATAATAA	+	22490093	22490132	22490133	22490593	22490133	22490134	Pper_target_707_genes_0_24147658
chr1	CTAAGCATAGAGCTCCGATGGAAGGCGTGGGGTCAAAAGC	+	22495498	22495537	22495538	22495998	22495548	22495549	Pper_target_708_genes_0_24147659
chr1	TGTCGGATTCCTCGACTTGTCTGTCTTTACCTACTTCATC	+	22579400	22579439	22579440	22579900	22579444	22579445	Pper_target_709_genes_0_24147660
chr1	ATTCCATCGAACCCTTTGACCATGTATGTCTTTCTAATAC	+	22638960	22638999	22639000	22639460	22639000	22639001	Pper_target_711_genes_0_24147662
chr1	TGCTGCTTTTGAATATCCCGGAAAAATGAAATCAAGAACG	+	22658154	22658193	22658194	22658654	22658212	22658213	Pper_target_712_genes_0_24147663
chr1	TATAGGACTCACAATCACATTTACAGATTTATACCTAGAG	+	22662098	22662137	22662138	22662598	22662162	22662163	Pper_target_713_genes_0_24147664
chr1	CCATTATCAACAATACTCCAAATCCCCCCAATCGTAAACG	+	22666816	22666855	22666856	22667316	22666871	22666872	Pper_target_714_genes_0_24147665
chr1	AATCGATTACAAGAACATAAATGCGAATATGAGATCAAAC	+	22670043	22670082	22670083	22670543	22670092	22670093	Pper_target_715_genes_0_24147666
chr1	TCAAAGTGCGGAATTCTACATCTCAATTTACATTATTTAT	+	22673978	22674017	22674018	22674478	22674037	22674038	Pper_target_716_genes_0_24147667
chr1	TTTTTTGGTTACAAAACATGACAAACTCGAAAAATAAACT	+	22681824	22681863	22681864	22682324	22681866	22681867	Pper_target_717_genes_0_24147668
chr1	TCGATGAATCTCCTGATGATCCCTCTTCCGTCACCGATTG	+	22748629	22748668	22748669	22749129	22748693	22748694	Pper_target_719_genes_0_24147670
chr1	CACCTGCAAGACTGTGATATAATGTCGGATCAGCAACAGG	+	22751656	22751695	22751696	22752156	22751702	22751703	Pper_target_720_genes_0_24147671
chr1	CAAAATCCAACATTAACTTTAACTAATATAATGACAAAAC	+	22765425	22765464	22765465	22765925	22765477	22765478	Pper_target_721_genes_0_24147672
chr1	ATGTGACGTTAATGTCAACTAATGGTATTCAAATTACTCT	+	22769387	22769426	22769427	22769887	22769427	22769428	Pper_target_722_genes_0_24147673
chr1	TGTAAGTGATAAAGTCATAATAAAGAAAAAATAAAAATTG	+	22880627	22880666	22880667	22881127	22880682	22880683	Pper_target_723_genes_0_24147674
chr1	TAGCTGTCTCATAACCCATGGTGGATCACATGGTTTAAGC	+	22960857	22960896	22960897	22961357	22960910	22960911	Pper_target_724_genes_0_24147675
chr1	GATTTTCTAAAGAGAATTGCGATTAAAAACTTCTGGCAAC	+	23148040	23148079	23148080	23148540	23148087	23148088	Pper_target_727_genes_0_24147678
chr1	ATATCTTATGTCTGGGTGTTACACTTATTATCTTCTATTC	+	23151038	23151077	23151078	23151538	23151089	23151090	Pper_target_728_genes_0_24147679
chr1	GTCAAAAGAGAGAAAACTCAACTCTATATGGGTGGAGCAC	+	23155000	23155039	23155040	23155500	23155061	23155062	Pper_target_729_genes_0_24147680
chr1	ACCAAAAGACAATTTCTATTTAGAGCAACTCAGCAGGTAG	+	23205525	23205564	23205565	23206025	23205580	23205581	Pper_target_730_genes_0_24147681
chr1	ATTATGTAATTAGTTTATTTTCTTTCAACCATTTTCATGT	+	23209939	23209978	23209979	23210439	23210002	23210003	Pper_target_731_genes_0_24147682
chr1	CCTGGTGGTAGCGTCGGTCTCGACTCGCCGTCTCTTCAAC	+	23265941	23265980	23265981	23266441	23266003	23266004	Pper_target_732_genes_0_24147683
chr1	ATGTGATATTAGACTGGACCGGAGGGTCCAACACCTTACG	+	23277683	23277722	23277723	23278183	23277746	23277747	Pper_target_733_genes_0_24147684
chr1	CTACTGTTGCTGACTATACCTTGAAATTTCGGGCCCTTTG	-	23508946	23508985	23508486	23508946	23508925	23508926	Pper_target_735_genes_0_24147686
chr1	GATCGCTTTTCCCGATTGGTGGTGTGCTGTAAAAACGATG	+	23512118	23512157	23512158	23512618	23512161	23512162	Pper_target_736_genes_0_24147687
chr1	CCCTAAACGGCAAATCGAATTGCGTAGGTAATGCATTTTG	+	23634958	23634997	23634998	23635458	23635009	23635010	Pper_target_738_genes_0_24147689
chr1	CAACCACACGAGCCCACGAAACCCATTTGAGCTATATGAC	+	23654115	23654154	23654155	23654615	23654157	23654159	Pper_target_739_genes_0_24147690
chr1	TTTTCTCGACCTCCATTTGCATTTGCGTATCAACCTTTTT	+	23658500	23658539	23658540	23659000	23658564	23658565	Pper_target_740_genes_0_24147691
chr1	CTACAGTATTGATGTTTGTGCCATTTGTAATTAAGAGTTC	-	23842881	23842920	23842421	23842881	23842856	23842857	Pper_target_742_genes_0_24147693
chr1	GATATCACTTCCTATGAGTTGTAAACCAAGTAATTCAAAC	+	23845951	23845990	23845991	23846451	23845992	23845993	Pper_target_743_genes_0_24147694
chr1	ATTATTATATATAACTAGAGTGGTATTACTTGCGCTTTGC	+	23850066	23850105	23850106	23850566	23850128	23850129	Pper_target_744_genes_0_24147695
chr1	TTGTTTCATAATATAAGTATAGTAAAACTTTTTGACATTT	+	23903834	23903873	23903874	23904334	23903893	23903894	Pper_target_746_genes_0_24147697
chr1	ACAGACAGTGAGACAGGTGTATAATATGTCCACCGACACC	+	23907219	23907258	23907259	23907719	23907278	23907279	Pper_target_747_genes_0_24147698
chr1	AGATTTGCAAATGAAATGTATGTAAATATTTTTTATTTCA	-	24005994	24006033	24005534	24005994	24005991	24005992	Pper_target_749_genes_0_24147700
chr1	AATTATATTTACAAAATGCTAATTTATATATAAAAAAAGG	+	24025404	24025443	24025444	24025904	24025455	24025456	Pper_target_751_genes_0_24147702
chr1	AACTTTATATATTTATATTTGAAACTCTGAATTTTATGTT	+	24028429	24028468	24028469	24028929	24028492	24028493	Pper_target_752_genes_0_24147703
chr1	GCAGCGGATATTACAGTCGCGGATAATGCAAAGCGCGAAG	+	24033903	24033942	24033943	24034403	24033943	24033944	Pper_target_753_genes_0_24147704
chr1	CCACTCGCCTGAGTAAATACATCCACCAATGGGGTTGAGC	+	24049922	24049961	24049962	24050422	24049984	24049985	Pper_target_754_genes_0_24147705
chr1	AATAGACCAAGTAGTATTAATTTATTATTTATATATTTGG	+	24061256	24061295	24061296	24061756	24061299	24061300	Pper_target_756_genes_0_24147707
chr1	TTTATTGATAACATATTTGGATCATTAAAAATCTTAAACT	+	24068120	24068159	24068160	24068620	24068179	24068180	Pper_target_757_genes_0_24147708
chr1	TTGCAAAAATTGGTGGACCTTGAACTGGACATGTTGAGCA	+	24089780	24089819	24089820	24090280	24089823	24089824	Pper_target_759_genes_0_24147710
chr1	AAACTGATGAAAGAACTTTGGAAGCAGTCCTACATCTTAC	+	24093609	24093648	24093649	24094109	24093672	24093673	Pper_target_760_genes_0_24147711
chr1	TTAAAATACAGTGGAAAGGAAATATAGTTACCTGAATACG	+	24133239	24133278	24133279	24133739	24133302	24133303	Pper_target_761_genes_0_24147712
chr1	CCGGCTGCCCACCCCAAAATCCCCCAACTTGATGACTCTG	+	24190131	24190170	24190171	24190631	24190171	24190172	Pper_target_764_genes_0_24147715
chr1	GAGTGATTGTTTCTTCCAATTCAGGATTTTGGGGATAGAG	+	24251994	24252033	24252034	24252494	24252040	24252041	Pper_target_766_genes_0_24147717
chr1	GTGATAATTGATTATGGAGTGTTGAAACAGGAACACTATG	+	24264008	24264047	24264048	24264508	24264052	24264053	Pper_target_767_genes_0_24147718
chr1	TGGCAAAAGGATATACAACCCAACCCATGCTGAAAATTAC	+	24267213	24267252	24267253	24267713	24267264	24267265	Pper_target_768_genes_0_24147719
chr1	CAAATGTATACATCTAAATAAAAAATCAAACAAACCATGT	+	24336757	24336796	24336797	24337257	24336802	24336803	Pper_target_769_genes_0_24147720
chr1	CTTATCTTTTGTCAATATTAGTCCCTAACCAGTAACTCTC	+	24354287	24354326	24354327	24354787	24354347	24354348	Pper_target_770_genes_0_24147721
chr1	TACATGATCTTCACCTTCGATCTCCATCATCTCTACTTTG	+	24401265	24401304	24401305	24401765	24401321	24401322	Pper_target_771_genes_0_24147722
chr1	GCTGCTTCACCTGCAAAACCCGTCGACAACAGTTGCTTTA	+	24405251	24405290	24405291	24405751	24405297	24405298	Pper_target_772_genes_0_24147723
chr1	ACACTATGCCAATTGTTCATATTTCACATCAGATTTTCTC	+	24472834	24472873	24472874	24473334	24472878	24472879	Pper_target_773_genes_0_24147724
chr1	TTCGGGTTTTGTTGAGAGAGTTGTGAGGCATTGGATCATT	+	24477304	24477343	24477344	24477804	24477366	24477367	Pper_target_774_genes_0_24147725
chr1	TGGACTATATGGTAACAGCCTCCTTCTCTTCTTTGATGTC	-	24489300	24489339	24488840	24489300	24489283	24489284	Pper_target_777_genes_0_24147728
chr1	ACAAGCTAATGTGTTGGAACATATAACAGGGACTAAAATG	+	24503830	24503869	24503870	24504330	24503889	24503890	Pper_target_778_genes_0_24147729
chr1	GGAACAACCAAAGGTGCATTCGGATGATTTCTTCTGTAAC	+	24506926	24506965	24506966	24507426	24506990	24506991	Pper_target_779_genes_0_24147730
chr1	AAATCATTCCAAAACACCATCGAGCTATAGTGTAAAAATA	+	24509999	24510038	24510039	24510499	24510063	24510064	Pper_target_780_genes_0_24147731
chr1	ATTTTATCTAGTCATATAGATAAAATGGCGGGAAACAAAG	+	24524014	24524053	24524054	24524514	24524077	24524078	Pper_target_782_genes_0_24147733
chr1	GGTATTCTGTGTACAAATTACATTAATGGTATTTTTTATA	-	24549288	24549327	24548828	24549288	24549269	24549270	Pper_target_783_genes_0_24147734
chr1	ATAATAACTAAATGGAGCATTGATTATGATGTACAAAGAG	+	24553111	24553150	24553151	24553611	24553164	24553165	Pper_target_784_genes_0_24147735
chr1	TGTTAAGAAATTGGCTCTCAATTGCCCATGCTTCCTCCAC	+	24556476	24556515	24556516	24556976	24556540	24556541	Pper_target_785_genes_0_24147736
chr1	TCATTAGAAATTGTATTTCCGGACATATGTATGATTCATG	+	24559504	24559543	24559544	24560004	24559555	24559556	Pper_target_786_genes_0_24147737
chr1	AAAGGAATAGTGGTTGTATTCGCTTGGATGTCAAGTCAAG	+	24597073	24597112	24597113	24597573	24597137	24597138	Pper_target_788_genes_0_24147739
chr1	AAAGATATTAGTCAGAGATGGTGGGGAAAGGAAGATAATG	+	24600273	24600312	24600313	24600773	24600325	24600326	Pper_target_789_genes_0_24147740
chr1	TACACACAAATAAAAAACAAAACAAGGAAAAACTGACAGG	+	24615930	24615969	24615970	24616430	24615977	24615978	Pper_target_790_genes_0_24147741
chr1	TAAAGTCTTTAAATTTCATTTTCTTTAACATAAATTGTCT	+	24620244	24620283	24620284	24620744	24620285	24620286	Pper_target_791_genes_0_24147742
chr1	TGGGATTATGATCAGCATTTGGCATACATGTGTTTCTTAG	+	24623316	24623355	24623356	24623816	24623364	24623365	Pper_target_792_genes_0_24147743
chr1	TGCGCTCCTCCGTCATGGCCACTCCGTTCGGGCGTTCGTC	+	24637068	24637107	24637108	24637568	24637124	24637125	Pper_target_794_genes_0_24147745
chr1	GGTAAATCGAACCCAAGTTTTTGGTCGGCTATTGTTAAAG	+	24642063	24642102	24642103	24642563	24642118	24642119	Pper_target_795_genes_0_24147746
chr1	CTGGTTGGTTTCTTTTATGTAGAGTTTAGGACTAACAAAG	+	24645286	24645325	24645326	24645786	24645326	24645327	Pper_target_796_genes_0_24147747
chr1	TGAAAATCTCCAATTAGAGTATTGGTAGTGGGAATCGAAC	+	24648296	24648335	24648336	24648796	24648346	24648347	Pper_target_797_genes_0_24147748
chr1	GCCCCAACACAAGAAGATGACAAAAGGAGTATTTAAAGTG	+	24651459	24651498	24651499	24651959	24651501	24651502	Pper_target_798_genes_0_24147749
chr1	GTACATTGAATGTATAAAGAACAGTTCCCGTTTAAACTAC	+	24832927	24832966	24832967	24833427	24832972	24832973	Pper_target_800_genes_0_24147751
chr1	TTCAAAATTTATAGGTCACTTTTCTTTTCCAATTATACGC	+	24844716	24844755	24844756	24845216	24844772	24844773	Pper_target_802_genes_0_24147753
chr1	ATTTCTCAAGTTGTGGAAGTACTTTTGTTTCTGAGTAAAG	+	24875647	24875686	24875687	24876147	24875697	24875698	Pper_target_804_genes_0_24147755
chr1	AAGTAAACTTTCAAAAATCATGAGTCTTAATTTGGTATAG	+	24878839	24878878	24878879	24879339	24878898	24878899	Pper_target_805_genes_0_24147756
chr1	TTAATTAATACTAAACTAATATTAAACTCATCATTTAATG	+	24882211	24882250	24882251	24882711	24882264	24882265	Pper_target_806_genes_0_24147757
chr1	CAGGGTTGTGGCCCCCAGCCTGACAAGAAAGACCACGATG	+	24885222	24885261	24885262	24885722	24885278	24885279	Pper_target_807_genes_0_24147758
chr1	ATCATTGTAAAGCTTCCTCATATGCGCCAACTCCGACATC	+	25061796	25061835	25061836	25062296	25061855	25061856	Pper_target_808_genes_0_24147759
chr1	TCATTGAGGATTTAACACTCGTCTTCTCGGGCATCTATTC	-	25066278	25066317	25065818	25066278	25066272	25066273	Pper_target_809_genes_0_24147760
chr1	TTTGCTTGAAGTTATGAAATCATTGCATCTTTAATGGAGT	-	25142625	25142664	25142165	25142625	25142606	25142607	Pper_target_810_genes_0_24147761
chr1	AAAAAAATTGCTAATTTTTCTTTAACAAAAAAGAAATGAT	+	25403768	25403807	25403808	25404268	25403809	25403810	Pper_target_813_genes_0_24147764
chr1	ATTTATCGAATTGTGAGGTATATTGTGATGACCATCATGT	+	25513597	25513636	25513637	25514097	25513652	25513653	Pper_target_814_genes_0_24147765
chr1	CATCGATAGTTACTAGGTTTGGCTTCTTGAAAGATTATTG	+	25526409	25526448	25526449	25526909	25526456	25526457	Pper_target_815_genes_0_24147766
chr1	TGCGATAATGCCGATCACTAAGTGTTTAGATTTATACTTG	+	25529660	25529699	25529700	25530160	25529716	25529717	Pper_target_816_genes_0_24147767
chr1	TTCAATGATGATGAATGAAGAGTTTTTTAATATATAAATG	+	25591592	25591631	25591632	25592092	25591641	25591642	Pper_target_819_genes_0_24147770
chr1	CCCACAAATAATCCCCTTCGTTTCAAAGTTCAACTGTTCT	+	25596123	25596162	25596163	25596623	25596187	25596188	Pper_target_820_genes_0_24147771
chr1	TAGATAACAAACAAAATAAAATAATATCGCGTGGGATTTG	+	25730428	25730467	25730468	25730928	25730491	25730492	Pper_target_821_genes_0_24147772
chr1	TTTTCAGGAGCTACTGGCTTTAGAAGAGAGGATTGGAAAC	+	25733635	25733674	25733675	25734135	25733698	25733699	Pper_target_822_genes_0_24147773
chr1	CGAAAAAGACAGCACCAAGGACCAAAAGTTTTATAAAAGG	+	25747922	25747961	25747962	25748422	25747981	25747982	Pper_target_823_genes_0_24147774
chr1	GCAGTTCAAATGAGAGAAAATATGAAACAAGAAGTAAAAG	+	25786406	25786445	25786446	25786906	25786458	25786459	Pper_target_825_genes_0_24147776
chr1	AATAGCTGAATAGCTTCCTGTTGCTCGCGATGGTTTACTC	+	25792971	25793010	25793011	25793471	25793026	25793027	Pper_target_826_genes_0_24147777
chr1	TGGACATTCCTAAGAACGTCCATAGCCTCAGCAACCTTAG	+	25799082	25799121	25799122	25799582	25799131	25799132	Pper_target_827_genes_0_24147778
chr1	TCCGAAAAATTTACCAAAAAGGGATAAAACCGCCGGAGAG	+	25802174	25802213	25802214	25802674	25802231	25802232	Pper_target_828_genes_0_24147779
chr1	TCCGTGTTTAAACAGACGCGACCCGAAAGTCCTCCGGTTG	+	25835602	25835641	25835642	25836102	25835666	25835667	Pper_target_829_genes_0_24147780
chr1	GGTTCCCTTGTGTCATTCTTTTATATTCTTTTGTAAGTTG	+	26122150	26122189	26122190	26122650	26122196	26122197	Pper_target_832_genes_0_24147783
chr1	ATTTGCTCTAGTCCTGATTTGTTTTCTTCATTTCAATCAC	+	26230184	26230223	26230224	26230684	26230228	26230229	Pper_target_833_genes_0_24147784
chr1	TGGGTTTTTATTTATTTATTTACTTATTTAATCGATCCTC	+	26234431	26234470	26234471	26234931	26234493	26234494	Pper_target_834_genes_0_24147785
chr1	ACGAAACAGGGAAACTCTCAGTCTCACAATTCATTGAAAC	+	26239365	26239404	26239405	26239865	26239422	26239423	Pper_target_835_genes_0_24147786
chr1	ATGATGACACATCATGCTATTATTTGTTGTAACATCCCTA	-	26304345	26304384	26303885	26304345	26304332	26304333	Pper_target_837_genes_0_24147788
chr1	GAGGTACTTTTAAGTTTAGGGTTGTCAAGCGGTTGTAATA	+	26391024	26391063	26391064	26391524	26391069	26391070	Pper_target_838_genes_0_24147789
chr1	TGTCCAGTCGCTTAACAAAGAAAAACACACTTTATTTCAG	+	26416473	26416512	26416513	26416973	26416537	26416538	Pper_target_839_genes_0_24147790
chr1	CATATTTCAATATGTTGTGATTGGGTTGAGGTGGTCATGT	+	26467350	26467389	26467390	26467850	26467421	26467422	Pper_target_840_genes_0_24147791
chr1	TCGTACAACCAAGGATGCAATGGTGGTGATATGGATTATG	+	26470749	26470788	26470789	26471249	26470813	26470814	Pper_target_841_genes_0_24147792
chr1	ATGTCTTCCCAACAGTGGTTATCTCCGGTAGTGATTGATG	+	26522085	26522124	26522125	26522585	26522149	26522150	Pper_target_843_genes_0_24147794
chr1	CTCTCTTTTCAACACAACCTCCAACAATGAAGCTCCTTCC	+	26568423	26568462	26568463	26568923	26568486	26568487	Pper_target_844_genes_0_24147795
chr1	TGTTTAAAAAAATACTCTTTCATTATATATATTCTTAATG	+	26571485	26571524	26571525	26571985	26571538	26571539	Pper_target_845_genes_0_24147796
chr1	GTTCAGTATGTAAATCCCTCTTCGAATTTAGTGAAACAAG	+	26582649	26582688	26582689	26583149	26582735	26582736	Pper_target_847_genes_0_24147798
chr1	CCTCCGATGCATCCTACTCTTCGAACTGGCGCACCGACGA	+	26598452	26598491	26598492	26598952	26598515	26598516	Pper_target_848_genes_0_24147799
chr1	AACCCTAGATTTCTAACAAAGGTATTTTGCAACTTATTCC	+	26637921	26637960	26637961	26638421	26637962	26637963	Pper_target_850_genes_0_24147801
chr1	AATCAGTGAATGAGTTTATTTGAGGGACAAAAAGTGTAAC	+	26648044	26648083	26648084	26648544	26648087	26648088	Pper_target_852_genes_0_24147803
chr1	GCATGATTGAATTTGTCTTCCTTAGTTAACACACGTCGTC	+	26652298	26652337	26652338	26652798	26652362	26652363	Pper_target_853_genes_0_24147804
chr1	CAAGAGAAGCTATTTTACGAGTTTGGGGAACATTCACAAC	+	26757084	26757123	26757124	26757584	26757147	26757148	Pper_target_854_genes_0_24147805
chr1	CTATGTATTATATACGGTTTCACATACAAGTTGGGACAAG	+	26900059	26900098	26900099	26900559	26900118	26900119	Pper_target_856_genes_0_24147807
chr1	TTAACTTTGAATCATTGAAATGCGAATTTGAAATTTTAAC	+	26914815	26914854	26914855	26915315	26914870	26914871	Pper_target_858_genes_0_24147809
chr1	GCAATGATTAACATCAATTCGCGAGAGTTGAACTATCTAG	+	26917947	26917986	26917987	26918447	26918002	26918003	Pper_target_859_genes_0_24147810
chr1	TTTTTATTGTGAATTTGTTTTTTTCTATATATTAATTACT	+	26921032	26921071	26921072	26921532	26921075	26921076	Pper_target_860_genes_0_24147811
chr1	GATATTCTTAGCACATATCACAAAAATTCGTAATAATTTC	+	26969200	26969239	26969240	26969700	26969257	26969258	Pper_target_861_genes_0_24147812
chr1	AAGGTTGGTCTGAGAGGATCAAGGAAGCAGCTAACAAGTC	+	26972352	26972391	26972392	26972852	26972416	26972417	Pper_target_862_genes_0_24147813
chr1	ATGGACAAAATGCCAAGTACACTAAAAATAGAAAGTTAAG	+	26994002	26994041	26994042	26994502	26994045	26994046	Pper_target_863_genes_0_24147814
chr1	TTCTACTTAGTTGATTTTTGACCAAAACACTCATGTACTC	+	27243841	27243880	27243881	27244341	27243899	27243900	Pper_target_866_genes_0_24147817
chr1	AACTTAATCACTTATAATTAACATTCAATAACATAAATCA	+	27250777	27250816	27250817	27251277	27250833	27250834	Pper_target_868_genes_0_24147819
chr1	ATCGTTAATTTCTTAGAAATAGTATTTATGACATGTTTCT	+	27326752	27326791	27326792	27327252	27326801	27326802	Pper_target_870_genes_0_24147821
chr1	GTGCCGCATGTTGTAGTCGCAGTTCTCAGTATATGATGTT	+	27330327	27330366	27330367	27330827	27330367	27330368	Pper_target_871_genes_0_24147822
chr1	CCGGTCGACCCAAACAACGTCGAGTGTCTATGCTCACAAC	-	27356823	27356862	27356363	27356823	27356796	27356797	Pper_target_872_genes_0_24147823
chr1	GATGCTATTTGGCAAAATCATCGGCGTCAATTACACTAGC	+	27361623	27361662	27361663	27362123	27361678	27361679	Pper_target_873_genes_0_24147824
chr1	TGAAAAATTTATTCTATGAGTTGACTTTGAATGTGATGAT	+	27384138	27384177	27384178	27384638	27384201	27384202	Pper_target_874_genes_0_24147825
chr1	ATAACATTCTAACCGTTTTTAAATTCATAGTAATGTGGAC	+	27411558	27411597	27411598	27412058	27411607	27411608	Pper_target_875_genes_0_24147826
chr1	TTTTATAAAAAAATTTTATAATTTATTTTAATAATTATTT	+	27414719	27414758	27414759	27415219	27414774	27414775	Pper_target_876_genes_0_24147827
chr1	CAAAAATAATCATTGAGACTCTCTTAAATCATCTTAGCAC	+	27466481	27466520	27466521	27466981	27466521	27466522	Pper_target_879_genes_0_24147830
chr1	TTTTTTGTTAACATATGGTTATTTTAGTCGATTTCCCCGA	+	27469749	27469788	27469789	27470249	27469794	27469795	Pper_target_880_genes_0_24147831
chr1	TACTCGTCCCTCACGAGTCATCAGAAGATTGTATTGTCAG	+	27544212	27544251	27544252	27544712	27544268	27544269	Pper_target_882_genes_0_24147833
chr1	TTGCAGACATTGATGCTTGCTTTTGCTGAGAAGTATTTAG	+	27549486	27549525	27549526	27549986	27549547	27549548	Pper_target_883_genes_0_24147834
chr1	CTCAGCTCAAGAACAATTAGACAAGCAGTTGGAGTAGTAG	+	27552681	27552720	27552721	27553181	27552721	27552722	Pper_target_884_genes_0_24147835
chr1	TGATTAGGTGAGATTAATGATAGTTACTTGTAGGTTTTCG	+	27559381	27559420	27559421	27559881	27559422	27559423	Pper_target_885_genes_0_24147836
chr1	TTTTCTTATAATAAATGAGGGGCACAGCTCTATGGGAGAC	+	27618952	27618991	27618992	27619452	27619013	27619014	Pper_target_887_genes_0_24147838
chr1	ACTACCACCGTTCTCCTGGAAGAAGCTATGGAAATTCACC	+	27622464	27622503	27622504	27622964	27622505	27622506	Pper_target_888_genes_0_24147839
chr1	ATCTAGCAACCTATCATAATAAAAATCGAGTATAGGACAT	-	27625601	27625640	27625141	27625601	27625586	27625587	Pper_target_889_genes_0_24147840
chr1	TAACAAAAAACATATTATTTGAAATTATGAAACATTGTTG	+	27642837	27642876	27642877	27643337	27642882	27642883	Pper_target_891_genes_0_24147842
chr1	TGTGAAATCTGATATCTGTTATTCGTGAAATGAAATTAAG	+	27646344	27646383	27646384	27646844	27646396	27646398	Pper_target_892_genes_0_24147843
chr1	AGAGATCATATGATGATGAATAAGAAATATATAATAGTGG	+	27679660	27679699	27679700	27680160	27679715	27679716	Pper_target_893_genes_0_24147844
chr1	AAAATGAGATTTTTTAAGATTTACTTACGAATCTTATAGT	-	27816500	27816539	27816040	27816500	27816479	27816480	Pper_target_895_genes_0_24147846
chr1	GATCTGCATTTAGATTTTTATCCGTGAGTTTCAACTGTCT	+	27897087	27897126	27897127	27897587	27897151	27897152	Pper_target_896_genes_0_24147847
chr1	AATTTAATCATAAATTAAAATTCTTCTAACAAAATAGTCC	+	27900165	27900204	27900205	27900665	27900208	27900209	Pper_target_897_genes_0_24147848
chr1	TTTAAGTGAAATTCCAACTAATAATTCTGTTTTCTCTTTC	+	27903158	27903197	27903198	27903658	27903210	27903211	Pper_target_898_genes_0_24147849
chr1	AATATGGTTTAAATTCATAAATTATAGGCTATCGATAGAA	+	27945925	27945964	27945965	27946425	27945984	27945985	Pper_target_899_genes_0_24147850
chr1	AATAGATCGATTTTACTTTTTTGTATAACATCATACCTTC	+	27955208	27955247	27955248	27955708	27955249	27955250	Pper_target_900_genes_0_24147851
chr1	GTGGTCGGTATAAAACTGATTTGCAGTTCTTCAATAAAAC	+	27960013	27960052	27960053	27960513	27960066	27960067	Pper_target_901_genes_0_24147852
chr1	TTACATTAATAAAAGATATACATATTCTAGCCTCCGTTTT	+	27963427	27963466	27963467	27963927	27963485	27963486	Pper_target_902_genes_0_24147853
chr1	GAAATTACTTATAGCCATCGTCGATTGTAGACGACGAAAC	+	28013481	28013520	28013521	28013981	28013529	28013530	Pper_target_903_genes_0_24147854
chr1	TTTATTTAAAATAAAAGCTAAATTTTTTTACTATATAACG	+	28017483	28017522	28017523	28017983	28017528	28017529	Pper_target_904_genes_0_24147855
chr1	GCTTAATTTAGCGAAGCCATGGATGAGCCAATTTCCAGAT	+	28046544	28046583	28046584	28047044	28046598	28046599	Pper_target_905_genes_0_24147856
chr1	TACTCAATTTTTAAATCAAAAGTTTAAAACATGTTTTTTC	+	28054683	28054722	28054723	28055183	28054736	28054737	Pper_target_906_genes_0_24147857
chr1	GAGTTATATGATTTTCTTTGGATATATTAAAGATTCGAAG	+	28058018	28058057	28058058	28058518	28058075	28058076	Pper_target_907_genes_0_24147858
chr1	AATACCGTTCATAGAAACCCCTAAATGCCGATTCCGTCTT	+	28105578	28105617	28105618	28106078	28105623	28105624	Pper_target_908_genes_0_24147859
chr1	TGATCATTTTCACCATCGGAAGAACATGAACAACAAGAAG	+	28110610	28110649	28110650	28111110	28110666	28110667	Pper_target_909_genes_0_24147860
chr1	TGGGCTATCGATCATAGAACCACCGTTCACCTATGAAGAG	+	28229427	28229466	28229467	28229927	28229488	28229489	Pper_target_910_genes_0_24147861
chr1	TCAAGATAGTTTTGAAGACAAATCTAAAGTTTTTGATATC	+	28234487	28234526	28234527	28234987	28234530	28234531	Pper_target_911_genes_0_24147862
chr1	TGGAATAATTTTGTATCTATCTGGTGGAGAAAATGAAAAG	+	28347549	28347588	28347589	28348049	28347602	28347603	Pper_target_912_genes_0_24147863
chr1	CTCCTGTAGCGTGGTGAAACTAGGAGTTGATGACATTTTG	+	28431680	28431719	28431720	28432180	28431724	28431725	Pper_target_914_genes_0_24147865
chr1	AATCGAAAACCCAGAATTTGTAATCGTGATTTTATTGGTG	+	28583194	28583233	28583234	28583694	28583245	28583246	Pper_target_915_genes_0_24147866
chr1	CCATCTTTAACCTGCTGGATTTGACATGGGTCGTGATCTG	-	28670009	28670048	28669549	28670009	28669983	28669984	Pper_target_916_genes_0_24147867
chr1	ATTTCATTAAAATCACTTACCCCTCCTTCTTCCGTAAAAC	+	28674630	28674669	28674670	28675130	28674676	28674677	Pper_target_917_genes_0_24147868
chr1	GTCGCCGACGAAGAGAGTTTAGTCTATGTTTCTGACAATG	+	28829703	28829742	28829743	28830203	28829748	28829749	Pper_target_918_genes_0_24147869
chr1	ATTATTAACCATAGGAAACCTTGCTAGTCTTAATGAAATA	+	28840772	28840811	28840812	28841272	28840834	28840835	Pper_target_919_genes_0_24147870
chr1	TGGCTAATTGGATCTTTTCTCGAGGTAATTCCTTTAATGC	-	28844160	28844199	28843700	28844160	28844145	28844146	Pper_target_920_genes_0_24147871
chr1	TCTAGTTCAACTTCAACAGATGCTGTTCCTGTTCCCAATG	+	28847483	28847522	28847523	28847983	28847526	28847527	Pper_target_921_genes_0_24147872
chr1	ATGGTCTTCTTGACCCCTTAGACCACAGCCTACGCTCTCT	+	28862813	28862852	28862853	28863313	28862876	28862877	Pper_target_923_genes_0_24147874
chr1	CCTTGTATTTTTGGCGTTCCTCTACGTGACTTTTTCATAG	+	28880440	28880479	28880480	28880940	28880485	28880486	Pper_target_924_genes_0_24147875
chr1	CATTTCTGAGTGAAAGGGGGAGCAGTGAGTGGTAGTTATC	+	28923460	28923499	28923500	28923960	28923501	28923502	Pper_target_925_genes_0_24147876
chr1	ACAAATTAATCAAAATAGTTTTTAACAAGACCCCCTTAAC	+	28930659	28930698	28930699	28931159	28930716	28930717	Pper_target_926_genes_0_24147877
chr1	ATCGGGTAGCAAACTTAACATGTACACGAAGGACAACATC	+	28955943	28955982	28955983	28956443	28955994	28955995	Pper_target_927_genes_0_24147878
chr1	CTGATAATATTATTGTTGGTTCTAATGTATGTAGTAAATC	+	28983022	28983061	28983062	28983522	28983066	28983067	Pper_target_928_genes_0_24147879
chr1	TAATTTGATTGCATTTTGTGTGGGATTCTAAATACCAGTC	+	28987165	28987204	28987205	28987665	28987224	28987225	Pper_target_929_genes_0_24147880
chr1	TATACCACCAGTAAAAATACATAGTGCAAAGAAAAGATAC	+	28990193	28990232	28990233	28990693	28990243	28990244	Pper_target_930_genes_0_24147881
chr1	GTGAGATGCAACAGTCGTTTTACTACGTAAACTGATCGAC	+	28996442	28996481	28996482	28996942	28996483	28996484	Pper_target_931_genes_0_24147882
chr1	ATGATCATGTCTACGAACAATTCGTTTTCTTAAAAGATTC	+	29028546	29028585	29028586	29029046	29028610	29028611	Pper_target_932_genes_0_24147883
chr1	TGATAAGTTGCTAGATTTTGGGTTTTGTCCCTAAACCTTC	-	29132308	29132347	29131848	29132308	29132291	29132292	Pper_target_933_genes_0_24147884
chr1	AATTAAAATATAAATAACAGATCTTAATTTGTTATATTTG	+	29135379	29135418	29135419	29135879	29135426	29135427	Pper_target_934_genes_0_24147885
chr1	ACTTCATACCGACCCACAAACCGTTAGGCTATGATTTTTC	+	29139060	29139099	29139100	29139560	29139105	29139106	Pper_target_935_genes_0_24147886
chr1	AAGCCTCTTTACAAGTGAAGAGGTTCCCATTACCATACCC	+	29161723	29161762	29161763	29162223	29161776	29161777	Pper_target_936_genes_0_24147887
chr1	ATAATCGTTTAGCAACGCTAGGGTTGATCTCCGTATTAAC	+	29257927	29257966	29257967	29258427	29257982	29257983	Pper_target_938_genes_0_24147889
chr1	TTGACGTTTTCTAAATGTGAATCTCTTACCACTCTTTGAC	+	29260928	29260967	29260968	29261428	29260991	29260992	Pper_target_939_genes_0_24147890
chr1	CTATAAGTAAACCTGTTTAATCAAAATCACAAGTAACATC	+	29264227	29264266	29264267	29264727	29264287	29264288	Pper_target_940_genes_0_24147891
chr1	ATTCACTAAAGAAAAAGTAACTCACTTTTGTTGTTTTTTC	+	29267241	29267280	29267281	29267741	29267294	29267295	Pper_target_941_genes_0_24147892
chr1	TTGCAAAACATAGAAACATCTTCTTATGTACATATCAAAC	+	29302353	29302392	29302393	29302853	29302412	29302413	Pper_target_942_genes_0_24147893
chr1	ACTATATAACAATTAATGGTATGTTTACTAACCCTAGATG	-	29305509	29305548	29305049	29305509	29305500	29305501	Pper_target_943_genes_0_24147894
chr1	AATACAGTTTTAATTCGTTAAAAACTACTTATTAAATTTG	+	29442169	29442208	29442209	29442669	29442222	29442223	Pper_target_944_genes_0_24147895
chr1	CACGGCGAAGTATTTTTCCACCACACCCCGGTTTATCTAC	+	29480232	29480271	29480272	29480732	29480272	29480273	Pper_target_945_genes_0_24147896
chr1	CGGTGCTTAAGCTGCCAATCACCATCACAGGCCATTAGAC	+	29486851	29486890	29486891	29487351	29486899	29486900	Pper_target_946_genes_0_24147897
chr1	CTTGCAATTTTGGTCTTATTTGAGGTTTTTGGTCGTTGTT	+	29490546	29490585	29490586	29491046	29490595	29490596	Pper_target_947_genes_0_24147898
chr1	GCTTGCCATTCTTTGTGCACTCATTGATGAAATCATGCTG	+	29494461	29494500	29494501	29494961	29494508	29494509	Pper_target_948_genes_0_24147899
chr1	TATGTGATAATTAAGGTTACGCATGTTTATATTTATCAGA	+	29498112	29498151	29498152	29498612	29498174	29498175	Pper_target_949_genes_0_24147900
chr1	TGCATCAACGTAAAAATGACCTAAAACTGAAACAATTTAC	+	29501684	29501723	29501724	29502184	29501729	29501730	Pper_target_950_genes_0_24147901
chr1	ATCGAAACGAGTTTTGATCCATTCAACATATTCTATTATT	+	29536449	29536488	29536489	29536949	29536495	29536496	Pper_target_951_genes_0_24147902
chr1	TCTTGTAACTCCCTCATGCAGTTCTTGCAGAGTGGAAACC	+	29539452	29539491	29539492	29539952	29539503	29539504	Pper_target_952_genes_0_24147903
chr1	ATTGGGTTAGGGTGAGACTGCATGGGATTGGGAGGTGGTG	+	29544064	29544103	29544104	29544564	29544125	29544126	Pper_target_953_genes_0_24147904
chr1	TCAGCATCACCATGACCGTCGGCCAGCGACTGTGAATTGC	+	29547919	29547958	29547959	29548419	29547968	29547969	Pper_target_954_genes_0_24147905
chr1	AACGTTTACAAATTCATACATCAAGCACCGTTTCAAACAC	+	29575772	29575811	29575812	29576272	29575830	29575831	Pper_target_955_genes_0_24147906
chr1	TATTTCTTTTAAATGAAATTACTTGACAACAGTTGAATTA	+	29580001	29580040	29580041	29580501	29580054	29580055	Pper_target_956_genes_0_24147907
chr1	GTATGTGCATGTTTAAGATCTTTACACCGGGAATACATTG	+	29587859	29587898	29587899	29588359	29587909	29587910	Pper_target_957_genes_0_24147908
chr1	TTTATATCTGGTAGATAATGCTCTGGTGGAAGAGGCTACG	+	29597011	29597050	29597051	29597511	29597075	29597076	Pper_target_958_genes_0_24147909
chr1	ATTATTATTATTATTTTTATGAATCATATATATTCAAACC	+	29618215	29618254	29618255	29618715	29618266	29618267	Pper_target_959_genes_0_24147910
chr1	ATATCGACTAACCTGTGGGAAAGAAGATCAACACTTAGAC	+	29633701	29633740	29633741	29634201	29633787	29633788	Pper_target_961_genes_0_24147912
chr1	GATGTGTTAGGCAGAAATGAATCAAAGACCAGTATAAATG	+	29655462	29655501	29655502	29655962	29655519	29655520	Pper_target_962_genes_0_24147913
chr1	GGATCCTTAAGGGGACAGGCTTCTTGGATTTTCTTTATTC	+	29658535	29658574	29658575	29659035	29658587	29658588	Pper_target_963_genes_0_24147914
chr1	GAACACGTGTTGCCTTCTCAGGCTGGTGTCGTGACGGAGT	+	29663313	29663352	29663353	29663813	29663353	29663354	Pper_target_964_genes_0_24147915
chr1	AGGGGAGAATCGAAACGTGAAGAAAGGATTCTCGTATTCC	+	29666379	29666418	29666419	29666879	29666423	29666424	Pper_target_965_genes_0_24147916
chr1	CTCGGTCGTTTCTGGTTATGTTATAAATGCACTATCTTTC	+	29669992	29670031	29670032	29670492	29670039	29670040	Pper_target_966_genes_0_24147917
chr1	TTCCGCCCCTGCTTTCAAGTATTTGTTTTGTACTTTTTGC	+	29673003	29673042	29673043	29673503	29673057	29673058	Pper_target_967_genes_0_24147918
chr1	ATGATTGATGTATGCTTTGGTATGGTTCTGGCATGTGTAG	+	29676820	29676859	29676860	29677320	29676881	29676882	Pper_target_968_genes_0_24147919
chr1	CATAATAATAAAAAAATATTATTGTTGCAATCATCTTTAA	+	29682952	29682991	29682992	29683452	29683011	29683012	Pper_target_969_genes_0_24147920
chr1	TTCACAAAATCCTATAAGTACTCCCATATATTTATGAGAG	+	29686068	29686107	29686108	29686568	29686127	29686128	Pper_target_970_genes_0_24147921
chr1	AAATAATAATAAAATTGAATGAAAATAAAATAATGATGTC	+	29689126	29689165	29689166	29689626	29689176	29689177	Pper_target_971_genes_0_24147922
chr1	TCACTCGTCGAGTAGGGCCAACTCGTCGAGTTCATCTGTC	-	29722928	29722967	29722468	29722928	29722925	29722926	Pper_target_972_genes_0_24147923
chr1	CTTGTGTCATTCGCTTTGTAATATCGCCTCTCTAATAAAC	+	29726396	29726435	29726436	29726896	29726448	29726449	Pper_target_973_genes_0_24147924
chr1	TCATGCATTCAATTTGTCCGTCCTATTGCACATGTAATTC	+	29729527	29729566	29729567	29730027	29729571	29729572	Pper_target_974_genes_0_24147925
chr1	AATCGTAACATTATATTCGAAAAACTGCAGAAACTATATC	+	29732687	29732726	29732727	29733187	29732734	29732735	Pper_target_975_genes_0_24147926
chr1	ATCTCTAGGGGATGAAGTGCGATCAAACCGAGCCCTTCCT	-	29782885	29782924	29782425	29782885	29782873	29782874	Pper_target_977_genes_0_24147928
chr1	GATGAGTAGAATCTGAGATACATGATTACAATAGGACTTG	+	29788439	29788478	29788479	29788939	29788481	29788482	Pper_target_978_genes_0_24147929
chr1	CCGGACTAAACCATCTTCATCGTAGGTTTGTGTTGTATTC	+	29791883	29791922	29791923	29792383	29791930	29791931	Pper_target_979_genes_0_24147930
chr1	ATGATCCAAAATTCGATGCATCTCCTCATGCACAATATAC	+	29795056	29795095	29795096	29795556	29795109	29795110	Pper_target_980_genes_0_24147931
chr1	AGATAAAAAATGTAATCAGTAATCGTTCCAAGAACCAATG	+	29798949	29798988	29798989	29799449	29798992	29798993	Pper_target_981_genes_0_24147932
chr1	ACTAAGAAAAACAAAAAGCAAAGAAGAAAAAGAACATATC	+	29801960	29801999	29802000	29802460	29802024	29802025	Pper_target_982_genes_0_24147933
chr1	AACTGACATTTGAAGGAGGTAGGGTTCCTCATTTCTTCTG	+	29823012	29823051	29823052	29823512	29823068	29823069	Pper_target_983_genes_0_24147934
chr1	ATTAATTCTAAGAACTTAACTACTAACAAGAATTTATATG	+	29860410	29860449	29860450	29860910	29860451	29860452	Pper_target_984_genes_0_24147935
chr1	AATCTGATCAAGTTGGTTAAGATTGAAGGTCGTTTTCTTC	+	29870907	29870946	29870947	29871407	29870949	29870950	Pper_target_985_genes_0_24147936
chr1	GGTTTAAAAAGTAATTTATAAACCCTAAGTGGATGTATCT	+	29890660	29890699	29890700	29891160	29890714	29890715	Pper_target_986_genes_0_24147937
chr1	CTATAATATATTATGCAAATAATTGTACCTACTGTTGTGA	+	29935240	29935279	29935280	29935740	29935290	29935291	Pper_target_987_genes_0_24147938
chr1	GGAATTGTACAACATGAAACACAATATTTCTCAAACCATC	-	29938723	29938762	29938263	29938723	29938696	29938697	Pper_target_988_genes_0_24147939
chr1	CAGCCATGGTCCAGAAAAGGATGATGGGGACACCGAGCTT	+	29949768	29949807	29949808	29950268	29949820	29949821	Pper_target_989_genes_0_24147940
chr1	CTATCAAGGTATCAACATATCCATTTGTCAAACAACTATC	+	29953067	29953106	29953107	29953567	29953118	29953119	Pper_target_990_genes_0_24147941
chr1	AATCTATATGACAAAATCTGCAACATTATTGACTTTCTAC	+	29957066	29957105	29957106	29957566	29957127	29957128	Pper_target_991_genes_0_24147942
chr1	CCTTCTCAAGGTATAAAGCTCCAAGTTTAATGAGTATTTC	+	29961740	29961779	29961780	29962240	29961783	29961784	Pper_target_992_genes_0_24147943
chr1	ATCTGAGGCAAAGACACTTCACCTATTTGAAGCAAGATAC	+	29997674	29997713	29997714	29998174	29997718	29997719	Pper_target_994_genes_0_24147945
chr1	TTAATTACGTCGGTGTATCATTTCCATATCAATAAGTTTG	+	30006327	30006366	30006367	30006827	30006388	30006389	Pper_target_995_genes_0_24147946
chr1	AAGATCTTCTTGGACGACATTCATATTGTCCTGTTCATTT	+	30096167	30096206	30096207	30096667	30096220	30096221	Pper_target_996_genes_0_24147947
chr1	CTGGTTGCAACGGTTGACAAGTTTCAAGGTCAACAAAATG	+	30155216	30155255	30155256	30155716	30155267	30155268	Pper_target_997_genes_0_24147948
chr1	GACTGCCACAATTGTTTCCTGAATCGCTTCGATCTTCTTC	+	30169236	30169275	30169276	30169736	30169297	30169298	Pper_target_999_genes_0_24147950
chr1	ATATTACAAACAGTTCCATCTTCGTTTGATCCCTTAAACA	+	30185982	30186021	30186022	30186482	30186046	30186047	Pper_target_1001_genes_0_24147952
chr1	ATAGTTTAAAGTTCTATTGGCTTTGTTACCAATATTGACC	+	30234949	30234988	30234989	30235449	30234993	30234994	Pper_target_1003_genes_0_24147954
chr1	CACTGATTGTATCTTGTCTATTAAAACTGTCGCCATACTG	+	30305459	30305498	30305499	30305959	30305501	30305502	Pper_target_1006_genes_0_24147957
chr1	ATTTCGAATTTTTGTCTTCCAGTCTGACACCGCATGTTGG	+	30364981	30365020	30365021	30365481	30365044	30365045	Pper_target_1009_genes_0_24147960
chr1	CTTTAGTTTATAAAGAAAATTGAAGTATGATTCTATATAG	+	30368230	30368269	30368270	30368730	30368277	30368278	Pper_target_1010_genes_0_24147961
chr1	GAGCGAGTTTTGAATAAACGGAAAAAATGTTGAAAAGTTA	+	30379450	30379489	30379490	30379950	30379509	30379510	Pper_target_1012_genes_0_24147963
chr1	GAGTTTTCTTTCTAGTGATAAACTCACACAGACCCAAAAG	+	30383195	30383234	30383235	30383695	30383258	30383259	Pper_target_1013_genes_0_24147964
chr1	AGTGGATTAAACCAGTTTGAGGGAATAAGAGAAACAGATG	+	30436753	30436792	30436793	30437253	30436796	30436798	Pper_target_1014_genes_0_24147965
chr1	GGACGAGGTCGGGGACTTTGAGATTCTTCTCATATAACTG	+	30441480	30441519	30441520	30441980	30441532	30441534	Pper_target_1015_genes_0_24147966
chr1	AACAAAAGTGCGATACAATTTGCGAAGAATCCTATTTTCC	-	30445432	30445471	30444972	30445432	30445426	30445427	Pper_target_1016_genes_0_24147967
chr1	TCAAATATCATAAATAATTGGTGTAACTTTGGGAATAATG	+	30475330	30475369	30475370	30475830	30475374	30475375	Pper_target_1017_genes_0_24147968
chr1	TTTTCTTTCTAATAAAAAGCCAAAAAGAAGAATAGGAAAC	+	30478345	30478384	30478385	30478845	30478403	30478404	Pper_target_1018_genes_0_24147969
chr1	TGGCTTTTAATGTTTATGGACATTTGGTGGGATTAGTTTC	+	30482182	30482221	30482222	30482682	30482228	30482229	Pper_target_1019_genes_0_24147970
chr1	ATGGAACGCATGTTTTTAATGAAACCACCACGTGGTAGTG	+	30486696	30486735	30486736	30487196	30486755	30486756	Pper_target_1020_genes_0_24147971
chr1	CCTCGGTCCGTACTAGGGACCGGTACTGCAATCCTAATAG	+	30489722	30489761	30489762	30490222	30489773	30489774	Pper_target_1021_genes_0_24147972
chr1	TTAGAATTTATAAAAATCCTACGGTTAAGTTAAGGAAAGC	+	30520422	30520461	30520462	30520922	30520473	30520474	Pper_target_1022_genes_0_24147973
chr1	TTATGATACCAACGTAAAAGTTAAAACTTAATAACTAAAG	+	30524514	30524553	30524554	30525014	30524558	30524559	Pper_target_1023_genes_0_24147974
chr1	ACAACCTTCCTTTTGGTCTTTTTGGCTAATTTTAACTTTC	+	30582640	30582679	30582680	30583140	30582702	30582703	Pper_target_1025_genes_0_24147976
chr1	ATAATCAATGCCACTTCAAATAAAGAAAAACATAAATAAT	+	30589138	30589177	30589178	30589638	30589194	30589195	Pper_target_1026_genes_0_24147977
chr1	TTTCCTGCAATTTGACTGTTATTTAAGAGACGATATTAAG	+	30592307	30592346	30592347	30592807	30592351	30592352	Pper_target_1027_genes_0_24147978
chr1	TGGTATGTTGTTTTATTTTTTCTGAATCTTGGATAATTTT	+	30599512	30599551	30599552	30600012	30599571	30599572	Pper_target_1028_genes_0_24147979
chr1	ACGAAACATCAAAATGAAATTAACATCAAGAGATGGATGC	+	30604301	30604340	30604341	30604801	30604363	30604364	Pper_target_1029_genes_0_24147980
chr1	AATTTGCAGTAATAAATCTAAATGAAAATCTGATAAGTGA	+	30607314	30607353	30607354	30607814	30607369	30607370	Pper_target_1030_genes_0_24147981
chr1	TAGACTAATGCAATAACAAGAATAACAAGAGCCAATATAA	+	30611002	30611041	30611042	30611502	30611063	30611064	Pper_target_1031_genes_0_24147982
chr1	TTTGCCCGTCAAAGATTCTACCAAAGAATTTGGCACCTAC	+	30658820	30658859	30658860	30659320	30658867	30658868	Pper_target_1032_genes_0_24147983
chr1	TGTCCGTCACTGATTTCATCCTCACCGCTGTCGTCTTCTT	-	30661893	30661932	30661433	30661893	30661869	30661870	Pper_target_1033_genes_0_24147984
chr1	AAGACGCTAAAACTTTCCAACGTGGGTGTTTTGTCTATTG	+	30664985	30665024	30665025	30665485	30665025	30665026	Pper_target_1034_genes_0_24147985
chr1	CCTTGGTTTGAGAAGTATGAAACGCCCATAAGCCAAGGTG	+	30671449	30671488	30671489	30671949	30671509	30671510	Pper_target_1036_genes_0_24147987
chr1	TGATAGTTAACAACTAGCAAGTTAGCATCATACATTAAAA	+	30680874	30680913	30680914	30681374	30680937	30680938	Pper_target_1039_genes_0_24147990
chr1	TCCCCATACTGTTGTTGATTATGAAAAATATAAGAAAAAG	+	30684062	30684101	30684102	30684562	30684108	30684109	Pper_target_1040_genes_0_24147991
chr1	TTGGATTTGATCCACATCAAATTTAAGAGGACTCTATCAC	+	30687108	30687147	30687148	30687608	30687157	30687158	Pper_target_1041_genes_0_24147992
chr1	TTCATCACTATCGAACTTCATTCTATCATATTTCCCTCTC	+	30703015	30703054	30703055	30703515	30703056	30703057	Pper_target_1042_genes_0_24147993
chr1	GTTTTCATAAGTACATTTTTCTGTTTTTTATGATGTAGAC	+	30706449	30706488	30706489	30706949	30706506	30706507	Pper_target_1043_genes_0_24147994
chr1	AGATTCGTTCAATATAAATGGCTTGCAACCAGAGGAGTAG	+	30710256	30710295	30710296	30710756	30710311	30710312	Pper_target_1044_genes_0_24147995
chr1	ATCTCTTGTGAATACTCGTAAGTGATCTTTCTAATTTATC	+	30741020	30741059	30741060	30741520	30741071	30741072	Pper_target_1046_genes_0_24147997
chr1	TGGCCGTGGAAAAGTTGTTGATTCCGTAGAAAACTAATCG	+	30771516	30771555	30771556	30772016	30771564	30771565	Pper_target_1047_genes_0_24147998
chr1	GTTCTTCTTGAAGAAGGATGGAATATGCAGTAGATACAGA	+	30776473	30776512	30776513	30776973	30776531	30776532	Pper_target_1048_genes_0_24147999
chr1	GATCGCGCCACATGTCGCTCGTTGATTACTCCAGAAAGTA	+	30812817	30812856	30812857	30813317	30812870	30812871	Pper_target_1050_genes_0_24148001
chr1	AGTGTGGAGCTTGATGCTGCAAATGCAGTAGGGATGTTTA	+	30859993	30860032	30860033	30860493	30860057	30860058	Pper_target_1052_genes_0_24148003
chr1	AAACAAAACTCTACAACTCCTCAGATTTGGAACATAATAC	+	30924164	30924203	30924204	30924664	30924228	30924229	Pper_target_1054_genes_0_24148005
chr1	CAGCGGAGGCGGCGGTGGCCGAGTCTTCAAAATCTGGTTG	+	30929438	30929477	30929478	30929938	30929482	30929483	Pper_target_1055_genes_0_24148006
chr1	GCAAGCTGAAACGAATCAGTGAATCATGAATTCACGGTTG	+	31081706	31081745	31081746	31082206	31081755	31081756	Pper_target_1056_genes_0_24148007
chr1	AACAATGATAACTGTAAAATTTGATATCTCAATGCTATGC	+	31085854	31085893	31085894	31086354	31085907	31085908	Pper_target_1057_genes_0_24148008
chr1	AACCACACAGAACAAATAGTTACATACAAAGTCGTAAATG	+	31088920	31088959	31088960	31089420	31088977	31088978	Pper_target_1058_genes_0_24148009
chr1	AAAAGTTTAGATATGAAACTTTTTGTTGGTGGGGTTTTAC	+	31092465	31092504	31092505	31092965	31092526	31092527	Pper_target_1059_genes_0_24148010
chr1	TCTACAGTAGCTTATAACCGATCTGCGAGGGAGGACTCAG	+	31113585	31113624	31113625	31114085	31113646	31113647	Pper_target_1061_genes_0_24148012
chr1	TAAATGTTGGAACACTTTTTACTATGTATATGTGTAGTGG	+	31117013	31117052	31117053	31117513	31117077	31117078	Pper_target_1062_genes_0_24148013
chr1	AATTTTTCTGTCAAATAAATTTTTTTCTAATTTATTATTC	-	31166552	31166591	31166092	31166552	31166547	31166548	Pper_target_1063_genes_0_24148014
chr1	TTTTTTCCTAAAATAATATACGTGTCAAAAAATTGTAGTC	+	31169606	31169645	31169646	31170106	31169665	31169666	Pper_target_1064_genes_0_24148015
chr1	CTTCAAATATAGGAAATAATTCACAAAAAGGTTTGTCACC	+	31172796	31172835	31172836	31173296	31172859	31172860	Pper_target_1065_genes_0_24148016
chr1	TTCAACCATCAGTTTTTCACATACCAAATCTGATTATTCG	+	31188202	31188241	31188242	31188702	31188243	31188244	Pper_target_1066_genes_0_24148017
chr1	CAAAATTCTTTTAGTTATTTTACCAAGCATGACCTTCAAC	+	31191497	31191536	31191537	31191997	31191561	31191562	Pper_target_1067_genes_0_24148018
chr1	AACATATTGAGTCGAAGGTACATCAATCCCACGTTTAGAG	+	31194514	31194553	31194554	31195014	31194574	31194575	Pper_target_1068_genes_0_24148019
chr1	AAAATATAAAATCAGATAAAAAATTTGGATTTTTTGTAGA	+	31198080	31198119	31198120	31198580	31198139	31198140	Pper_target_1069_genes_0_24148020
chr1	GCTCAGTACAATCAAAGAGGTACAGAAAGGACGACTAAAG	-	31201626	31201665	31201166	31201626	31201607	31201608	Pper_target_1070_genes_0_24148021
chr1	TCTGGTTCATTTATTTGGGTAACTGCTGCAACTAGAATTT	+	31204566	31204605	31204606	31205066	31204630	31204631	Pper_target_1071_genes_0_24148022
chr1	ACTTGCCAAATGTAATTCAAAAGCCTTCTAAGCAGCAATG	+	31207629	31207668	31207669	31208129	31207671	31207672	Pper_target_1072_genes_0_24148023
chr1	ATTACGTGTGCCATCAGAAACTCCTTCATATAGTTTAGTC	+	31211506	31211545	31211546	31212006	31211558	31211559	Pper_target_1073_genes_0_24148024
chr1	GGGTGTCCCTAAAAATATTGTCAATATGCATGCATTAAAC	+	31214584	31214623	31214624	31215084	31214639	31214640	Pper_target_1074_genes_0_24148025
chr1	CGGCTCAATGTCTTTTGACGTCACCTACAGTCGCACATAC	+	31253426	31253465	31253466	31253926	31253468	31253469	Pper_target_1076_genes_0_24148027
chr1	TCATATCCATGGATAAACAACAATATCATATAAAAGTAAT	+	31260331	31260370	31260371	31260831	31260395	31260396	Pper_target_1077_genes_0_24148028
chr1	GTTTTTTTAACTTCTCATTATTACAATTATATCCTTCTGC	+	31263473	31263512	31263513	31263973	31263537	31263538	Pper_target_1078_genes_0_24148029
chr1	TAGCTCTTAATCTTTTCCCAGTTGTTTGTGACACTAGAAG	+	31266735	31266774	31266775	31267235	31266791	31266792	Pper_target_1079_genes_0_24148030
chr1	AGGAATGCTCCCCCACAATGCTAATAGTGCTTATAACTCC	+	31279574	31279613	31279614	31280074	31279616	31279617	Pper_target_1081_genes_0_24148032
chr1	CCTCCCTAAAGCCATACATATCGATGAAGACCATTTAGAC	+	31283189	31283228	31283229	31283689	31283243	31283244	Pper_target_1082_genes_0_24148033
chr1	TGCATTGTACTTATAAAAATCTCCCAATCATAGCATTTTG	-	31286715	31286754	31286255	31286715	31286688	31286689	Pper_target_1083_genes_0_24148034
chr1	GACCATGAACATTGTTTTCTTTGTGGAAGATCGGTAACCA	+	31291540	31291579	31291580	31292040	31291581	31291582	Pper_target_1084_genes_0_24148035
chr1	CGCCCCGTTCCTGGTACGCATTTAAACATTATTTTTCTTC	+	31317418	31317457	31317458	31317918	31317460	31317461	Pper_target_1085_genes_0_24148036
chr1	ATACCACTAGACCAAATGCCCAGGCTTGACTTTTACTATC	+	31320554	31320593	31320594	31321054	31320610	31320611	Pper_target_1086_genes_0_24148037
chr1	AGCCCGACATAAACTCGGTGCTTCTCTACGCTCACAAACC	+	31323595	31323634	31323635	31324095	31323644	31323645	Pper_target_1087_genes_0_24148038
chr1	AAAAGGTTTTCCAGCAAAGATGTTTGTAAAAGGATTCAAC	+	31327345	31327384	31327385	31327845	31327409	31327410	Pper_target_1088_genes_0_24148039
chr1	CAATCATTCATGATCCAACAAAAAAATATGTTAGATTTAG	+	31330395	31330434	31330435	31330895	31330454	31330455	Pper_target_1089_genes_0_24148040
chr1	AAAGTTACAACACAATATCTACACAATATTCCCTTGCATC	+	31352756	31352795	31352796	31353256	31352817	31352818	Pper_target_1090_genes_0_24148041
chr1	GAACAAGATCTTTTTGACCAATGAATAAGTTTGCAACAAC	+	31357435	31357474	31357475	31357935	31357485	31357486	Pper_target_1091_genes_0_24148042
chr1	GTTTGCTCGTTTTATATGATACGTTTTAGTTCATAATCAG	+	31360468	31360507	31360508	31360968	31360532	31360533	Pper_target_1092_genes_0_24148043
chr1	AAAAGACGTTAATGCCATTGGCTTGTTTTCAAAGGTTATT	+	31363537	31363576	31363577	31364037	31363578	31363579	Pper_target_1093_genes_0_24148044
chr1	GCCCCTATGAGTTTTAGAGAATCCTAGCCGATTTTTATTC	+	31370310	31370349	31370350	31370810	31370363	31370364	Pper_target_1094_genes_0_24148045
chr1	ACCGAAAACCACTCATCCATGCCACAAGCCCGACTTGATA	+	31373447	31373486	31373487	31373947	31373509	31373510	Pper_target_1095_genes_0_24148046
chr1	GACTTACATTGCTAATTTCTCATTTTTGTTGTTACATAAG	+	31424089	31424128	31424129	31424589	31424137	31424138	Pper_target_1097_genes_0_24148048
chr1	AATGGTAAGCAATTATTCACATTTTCTTATGTTTGATCTC	+	31427871	31427910	31427911	31428371	31427914	31427915	Pper_target_1098_genes_0_24148049
chr1	TTCTTGCATTTAGTCCAATAAAGTGTGATCAACTTTGAAG	+	31431584	31431623	31431624	31432084	31431641	31431642	Pper_target_1099_genes_0_24148050
chr1	ACACTTGTATCATATACTTACAATTTATATATAAGTTACA	+	31446102	31446141	31446142	31446602	31446161	31446162	Pper_target_1100_genes_0_24148051
chr1	TTGTTTTTTTGTTTTTTCTTTGTTTTAATTGGTTGTGTTG	+	31449153	31449192	31449193	31449653	31449196	31449197	Pper_target_1101_genes_0_24148052
chr1	TGTTCATTGTAGCCTAATTGGGTATCAAGTTCCTAAAAAG	+	31452199	31452238	31452239	31452699	31452263	31452264	Pper_target_1102_genes_0_24148053
chr1	GTTCGATCATAATTTGGTAAAAACCAATCATCCTATACAA	+	31483037	31483076	31483077	31483537	31483099	31483100	Pper_target_1103_genes_0_24148054
chr1	GATGCATCGTTACTTTTTAAATATTTATAATAAAACAACT	+	31487308	31487347	31487348	31487808	31487365	31487366	Pper_target_1104_genes_0_24148055
chr1	TGAGTCCCTCTTTGCAAATTTATACTAACTCCTCTTTTAC	-	31491852	31491891	31491392	31491852	31491833	31491835	Pper_target_1105_genes_0_24148056
chr1	TGGCACAAAGGCGGTTTGATTGGATTTTGAGAGATCACAG	+	31494827	31494866	31494867	31495327	31494872	31494873	Pper_target_1106_genes_0_24148057
chr1	GCTTCGACAGTGGTTTGGTTTTTCCAAGAAATGATAGATG	+	31500660	31500699	31500700	31501160	31500717	31500718	Pper_target_1107_genes_0_24148058
chr1	TTTTGACGCTAAATTTGGTGACAACCGCCATAAACATTTC	+	31504275	31504314	31504315	31504775	31504315	31504316	Pper_target_1108_genes_0_24148059
chr1	TATAGTGTAAGAATTATAGGGTGACTTGGACCTTATGTAG	+	31537102	31537141	31537142	31537602	31537142	31537143	Pper_target_1110_genes_0_24148061
chr1	TTCGGGTGTTGCCATTGTTGTACCATTGCATCCTCTCTAT	+	31563641	31563680	31563681	31564141	31563695	31563696	Pper_target_1111_genes_0_24148062
chr1	CTTTTTAAAAAATTAACCAAAATTTAAGAAATTTCCTCCC	+	31571570	31571609	31571610	31572070	31571623	31571624	Pper_target_1112_genes_0_24148063
chr1	AAAAAAATATGAGGGGTTATCTTTAATATTTCTTTTTAAC	+	31574972	31575011	31575012	31575472	31575014	31575015	Pper_target_1113_genes_0_24148064
chr1	TTTTATTGAAACTTTAATGAAATAAATATGCTGTCACTTC	+	31578017	31578056	31578057	31578517	31578060	31578061	Pper_target_1114_genes_0_24148065
chr1	TGTTTTTATTTTTATAATTATATACATAATATTGTAGATG	+	31581015	31581054	31581055	31581515	31581068	31581069	Pper_target_1115_genes_0_24148066
chr1	ATGTTTGTGACATTGTATGTCCAATATGCTAGGTTGGATG	-	31584088	31584127	31583628	31584088	31584074	31584075	Pper_target_1116_genes_0_24148067
chr1	AAGTTACTTTAGGACTTAATGGGAAAAAGTGTCATTTCTG	+	31588793	31588832	31588833	31589293	31588855	31588856	Pper_target_1117_genes_0_24148068
chr1	GATATAGATCGAAGTATAAGAAGAAAATAAGAGTTGTGAC	+	31597111	31597150	31597151	31597611	31597153	31597154	Pper_target_1118_genes_0_24148069
chr1	AACCGGGTACCCGTTTTTGGAACTGGAACCACATCGGAAC	-	31636734	31636773	31636274	31636734	31636731	31636732	Pper_target_1121_genes_0_24148072
chr1	TCGTGGCCAAGATTTTGAGAAGGTACTGTTGTTGTCTTTC	+	31641213	31641252	31641253	31641713	31641254	31641255	Pper_target_1122_genes_0_24148073
chr1	TTGTCTTTGGAGGATGGAGATGATTCCTACACATCCGTAA	+	31824170	31824209	31824210	31824670	31824232	31824233	Pper_target_1123_genes_0_24148074
chr1	TATATTTTTTCAGAGAACCGTCATCTATCTGCGTAACCTG	+	31829425	31829464	31829465	31829925	31829484	31829485	Pper_target_1124_genes_0_24148075
chr1	AATATTTAAATATTAATTATCTAAATTAATCATATTTAAT	+	31832977	31833016	31833017	31833477	31833030	31833031	Pper_target_1125_genes_0_24148076
chr1	TGGTGTGACGGGATCACGAGGTGGTGGTTACCATGGAGTG	-	31897262	31897301	31896802	31897262	31897246	31897247	Pper_target_1126_genes_0_24148077
chr1	TGTACGTAAAATTTAGGCCCATTTTCTTTTTAATATCTTC	+	31900929	31900968	31900969	31901429	31900971	31900972	Pper_target_1127_genes_0_24148078
chr1	ATCCCATCTTCATCTTCATGAGATCTGGGTTTTGACGAAC	+	31904955	31904994	31904995	31905455	31904999	31905000	Pper_target_1128_genes_0_24148079
chr1	ATACGGTGAGCCATTGAACTATCCATTGACCTAACAAAAA	+	31909485	31909524	31909525	31909985	31909526	31909527	Pper_target_1129_genes_0_24148080
chr1	TGCTCTTTGACATTTTCCCTTTGATACATTCATTGAAAAC	+	31937786	31937825	31937826	31938286	31937828	31937829	Pper_target_1131_genes_0_24148082
chr1	AACTCTCTTATTAGAACTATTAGAACAATATACATTGAAA	+	31941175	31941214	31941215	31941675	31941226	31941227	Pper_target_1132_genes_0_24148083
chr1	CAAAACTAGAAACCAGAACACAAGAGAAGAGAGAGGAGAG	+	31958373	31958412	31958413	31958873	31958425	31958426	Pper_target_1133_genes_0_24148084
chr1	GTTCATTAGTTCTTACTCGATCAAATGCTCTTTAACAAGG	+	31963438	31963477	31963478	31963938	31963501	31963502	Pper_target_1134_genes_0_24148085
chr1	TCCAACCAAAAATTTGATTTTATTCGGTCTGGATTATCTG	+	31971033	31971072	31971073	31971533	31971092	31971093	Pper_target_1136_genes_0_24148087
chr1	ATGAATGGTCTCTCTGTTCTTAATTATTCTAAAATCCATC	+	31975622	31975661	31975662	31976122	31975672	31975673	Pper_target_1137_genes_0_24148088
chr1	TGGCACAAATTTCAAGATCAAAGAAACCGCAGAGTTCAAG	+	31978690	31978729	31978730	31979190	31978737	31978738	Pper_target_1138_genes_0_24148089
chr1	TTCAAATAGCACAAATTTGAAGGATATTGTTGAAAAAAAG	+	31996282	31996321	31996322	31996782	31996341	31996342	Pper_target_1140_genes_0_24148091
chr1	TGCTTTATCGATTCTTTATTCCCATAAACCCGAAGCATTA	+	31999805	31999844	31999845	32000305	31999869	31999870	Pper_target_1141_genes_0_24148092
chr1	TGTGGTTATTCTCGCAATGGTGCCATTATCAAGTGAACCT	+	32013453	32013492	32013493	32013953	32013515	32013516	Pper_target_1142_genes_0_24148093
chr1	AAAGCTCTGGTGCCATGAACTCCGGAGTTCCTAAACACAA	+	32162002	32162041	32162042	32162502	32162051	32162053	Pper_target_1146_genes_0_24148097
chr1	CTGTCGTAAACGAACCAACGACCAGTCGATCAATTATTCC	+	32165821	32165860	32165861	32166321	32165869	32165870	Pper_target_1147_genes_0_24148098
chr1	TGTAACATCCGGACTTTCAGGTATATTATTATTGTGTTTA	+	32173624	32173663	32173664	32174124	32173687	32173688	Pper_target_1148_genes_0_24148099
chr1	ATCATCAACATGTTTGAAAATCTTATGTTCGAAAATAATG	+	32185761	32185800	32185801	32186261	32185810	32185811	Pper_target_1150_genes_0_24148101
chr1	AAACCATTTTCGGGGGTACCACGTTGTTGGTCCCAACAAC	+	32208944	32208983	32208984	32209444	32209001	32209002	Pper_target_1151_genes_0_24148102
chr1	AAGGTAAAACCCTAATATACAATATCAGAACCAATGTTTG	+	32212281	32212320	32212321	32212781	32212343	32212344	Pper_target_1152_genes_0_24148103
chr1	ACATTTTAGTGTGATAAACAAAAAGAATGTTCCTTATTCC	+	32229067	32229106	32229107	32229567	32229114	32229115	Pper_target_1155_genes_0_24148106
chr1	ATCTTGGGCGAGTAAAACCTTCCTTCGGAACTGGATGTGA	+	32417386	32417425	32417426	32417886	32417450	32417451	Pper_target_1157_genes_0_24148108
chr1	GGCATGAGAAACAACAAGAGTGACACTAATCCCTCCATAG	+	32420580	32420619	32420620	32421080	32420644	32420645	Pper_target_1158_genes_0_24148109
chr1	ATCACACTCAGTCCACAAACACTACCTTGTGACCATAATC	+	32423645	32423684	32423685	32424145	32423689	32423690	Pper_target_1159_genes_0_24148110
chr1	GGTGTCCAGTTAGGCCACAGGCCTGAAGAGCGGTCATTAT	+	32517988	32518027	32518028	32518488	32518045	32518046	Pper_target_1161_genes_0_24148112
chr1	CGACCATTGTCAACAATGCTAAGGTATTCATTCTCTTTAC	+	32521929	32521968	32521969	32522429	32521980	32521981	Pper_target_1162_genes_0_24148113
chr1	TAGGTGAGATTCCATCTAAGATACTCAGCATACACATAAC	+	32525566	32525605	32525606	32526066	32525625	32525626	Pper_target_1163_genes_0_24148114
chr1	CAAGAATATCTATAGGTAATCTTCACCTTGCTTTGAATTG	+	32567101	32567140	32567141	32567601	32567155	32567156	Pper_target_1165_genes_0_24148116
chr1	AATAATAATCTTGTAATCTCCTGGATTTTAAACTCTATTT	+	32570367	32570406	32570407	32570867	32570431	32570432	Pper_target_1166_genes_0_24148117
chr1	TCAAAGCTTGACAAAAACCCAGATCTAACGCATTATGAGG	+	32576960	32576999	32577000	32577460	32577011	32577012	Pper_target_1167_genes_0_24148118
chr1	ACGAAGAACTTATTATCAAAATTTCTATTTCTCTCGTGAC	+	32580397	32580436	32580437	32580897	32580457	32580458	Pper_target_1168_genes_0_24148119
chr1	TTCAAACTACCCATGCTATAGATGTTTCAATTGGTCATAC	+	32583846	32583885	32583886	32584346	32583891	32583892	Pper_target_1169_genes_0_24148120
chr1	CTCAATTGGGGCAACAATTACTATCTGGCTTACTTCTAAC	+	32586941	32586980	32586981	32587441	32586984	32586985	Pper_target_1170_genes_0_24148121
chr1	CGAAACCAACATCAATAAAACTAACACATTAGCGCTCAGG	+	32589939	32589978	32589979	32590439	32589998	32589999	Pper_target_1171_genes_0_24148122
chr1	GATCTGATATGCAATTATACAATGATCTCCGAAATAAAAA	+	32611070	32611109	32611110	32611570	32611133	32611134	Pper_target_1172_genes_0_24148123
chr1	TTATGCAGTTGAAAGTTGATGGTTCTTTGAAATTCTTTTG	+	32614258	32614297	32614298	32614758	32614308	32614309	Pper_target_1173_genes_0_24148124
chr1	AGAACTCTATGCTAAATTTGGCTTGATGTTGCTAAATTTC	+	32632356	32632395	32632396	32632856	32632413	32632414	Pper_target_1174_genes_0_24148125
chr1	GCATGAGTATGTGATGCCTTAGTTTCTATAGAGTTTCTTG	+	32669270	32669309	32669310	32669770	32669312	32669313	Pper_target_1175_genes_0_24148126
chr1	ATCAATCTAGCAAACGGGACTTCTTAATTCAAGGTATCAG	+	32672718	32672757	32672758	32673218	32672762	32672763	Pper_target_1176_genes_0_24148127
chr1	TCGCCTTATCGTATTCGTTAATATCTCGATATCCGAGATC	+	32682612	32682651	32682652	32683112	32682667	32682668	Pper_target_1178_genes_0_24148129
chr1	TGGGAAAAAGAAGATGGTTTTTCACTTGAATTCTTACTAC	+	32685654	32685693	32685694	32686154	32685695	32685696	Pper_target_1179_genes_0_24148130
chr1	TCCACGTACGTTGAGTTTCGAATCGTTTGGGCTCATGGTG	+	32688979	32689018	32689019	32689479	32689034	32689035	Pper_target_1180_genes_0_24148131
chr1	GAGACCTCTTTCCCCTCCCCCTCCCCCTCATCACTCAAAG	+	32940032	32940071	32940072	32940532	32940078	32940079	Pper_target_1182_genes_0_24148133
chr1	GGCCTAAAATTAAGAGATTTATAAAACGAACAATAATAAA	+	32973715	32973754	32973755	32974215	32973779	32973780	Pper_target_1183_genes_0_24148134
chr1	AAATAAATTGATCTTAAAAGACAAACCAAAAGATTACAAC	+	32977222	32977261	32977262	32977722	32977270	32977271	Pper_target_1184_genes_0_24148135
chr1	GAGGCCACCTAGTACATTGGGCATACCAGTGGGTGCGTTG	+	32980923	32980962	32980963	32981423	32980975	32980976	Pper_target_1185_genes_0_24148136
chr1	TGTAATATTGAATTATCAATGCATGGGTTAATCTCTGAAG	+	33064346	33064385	33064386	33064846	33064400	33064401	Pper_target_1186_genes_0_24148137
chr1	AAAATATTGTGAATTATCTAAGTTGTTTTTTAAAGAAAAC	+	33068401	33068440	33068441	33068901	33068456	33068457	Pper_target_1187_genes_0_24148138
chr1	GCTCGTATCATAACCAACCACCGCTACTCCATGATTCAAC	+	33081208	33081247	33081248	33081708	33081258	33081259	Pper_target_1188_genes_0_24148139
chr1	GGAATTAATTCCTTCACAACATGGAAAGCACAAGATTACG	+	33086237	33086276	33086277	33086737	33086285	33086286	Pper_target_1189_genes_0_24148140
chr1	TTCGTGTATCCACACATATCTCTCTCTCTCAAGTCTCAAC	+	33097998	33098037	33098038	33098498	33098055	33098056	Pper_target_1190_genes_0_24148141
chr1	TTCATAGTGTGCCACCAAAAACTCCCTTCTATTTCATCCA	-	33102501	33102540	33102041	33102501	33102474	33102475	Pper_target_1191_genes_0_24148142
chr1	ATATTTTTAGACCAAAAATGCAACAACAATTTTTAGACAC	+	33122623	33122662	33122663	33123123	33122686	33122687	Pper_target_1192_genes_0_24148143
chr1	CTTCATTTTCTCTTATGTTTGTTGGTGGGTGATGTCTGAA	+	33151281	33151320	33151321	33151781	33151345	33151346	Pper_target_1193_genes_0_24148144
chr1	ATCTTTGATTACAGAATAGCTACTATATAAAACTTTATAG	+	33154318	33154357	33154358	33154818	33154369	33154370	Pper_target_1194_genes_0_24148145
chr1	CAACACTTCCAAACACTATCCCTTTCAGTAAACCTTGTTC	+	33157463	33157502	33157503	33157963	33157514	33157515	Pper_target_1195_genes_0_24148146
chr1	ATAATAAATAAAATATAAATTAGAAAACACAACTAAAAAG	+	33169541	33169580	33169581	33170041	33169585	33169586	Pper_target_1197_genes_0_24148148
chr1	CCACATTGAAAACTCAACTCCCCAAACCCACAAGAGAGGA	+	33173094	33173133	33173134	33173594	33173150	33173151	Pper_target_1198_genes_0_24148149
chr1	TGTTGAGCTCAAGTGTTGCTTTATATTGTGAAGGTATCTC	+	33191761	33191800	33191801	33192261	33191809	33191810	Pper_target_1200_genes_0_24148151
chr1	TCCACAACAATGGAGATTCTTGGTGTGTCAGTTTCACCTC	+	33194813	33194852	33194853	33195313	33194877	33194878	Pper_target_1201_genes_0_24148152
chr1	GATTCAGGAACGCTTATTTATTTAGGTCAATACCAATATC	-	33210571	33210610	33210111	33210571	33210548	33210549	Pper_target_1202_genes_0_24148153
chr1	AGTCAGCAACTGCAAACGAACCCAATGTTATGAGGAAATC	+	33213634	33213673	33213674	33214134	33213688	33213689	Pper_target_1203_genes_0_24148154
chr1	TTGATGTACTAATGATCGATGGAATTGGAGCATTTTACTG	+	33216655	33216694	33216695	33217155	33216695	33216696	Pper_target_1204_genes_0_24148155
chr1	CATATGTATGCTTCAATAATTTGAGTTTAGAATAATTTGG	+	33265056	33265095	33265096	33265556	33265107	33265108	Pper_target_1206_genes_0_24148157
chr1	ATTCCAGGGCACCCTCTTCGCCCACCACCAAATGGAAGCA	+	33268135	33268174	33268175	33268635	33268175	33268176	Pper_target_1207_genes_0_24148158
chr1	GAGCTTAGATTTATTAAGATTAAGATTAAGGCCCGACACC	+	33275172	33275211	33275212	33275672	33275233	33275234	Pper_target_1208_genes_0_24148159
chr1	CTTGATGATAAAACCTCTTTGATCTAGTTTTGCTCAAGTC	-	33309963	33310002	33309503	33309963	33309950	33309951	Pper_target_1209_genes_0_24148160
chr1	GGACGGAGATGGAGAGTGACACATGTCCGGGGTTCATATC	+	33313621	33313660	33313661	33314121	33313674	33313675	Pper_target_1210_genes_0_24148161
chr1	CAAATACCTTCAAAATTCAACACATAACAAGAAATAAAAG	+	33358430	33358469	33358470	33358930	33358470	33358471	Pper_target_1211_genes_0_24148162
chr1	AGTTTGTATTCTCTGGAAGGCTTGACAATCTCTGTATGTC	+	33362733	33362772	33362773	33363233	33362797	33362798	Pper_target_1212_genes_0_24148163
chr1	TAGACTCTAAACGGATGAACATCGATGCACGCATAGTGAA	+	33421598	33421637	33421638	33422098	33421648	33421649	Pper_target_1213_genes_0_24148164
chr1	AACAGATAAACAGGTAGATGATTACTTCTGCGTTACTCTC	+	33426830	33426869	33426870	33427330	33426876	33426877	Pper_target_1214_genes_0_24148165
chr1	ATATTAATAGAAATTGTTGTTGTTTTCATCTGTTTTTCTG	+	33430331	33430370	33430371	33430831	33430379	33430380	Pper_target_1215_genes_0_24148166
chr1	TAATAAAAAAATATGAGAAAACATTTATTCTATATAAATG	+	33435939	33435978	33435979	33436439	33435988	33435989	Pper_target_1216_genes_0_24148167
chr1	TTTTGATTTCATTATTAATCACATGCTATGGCTGATTAGA	+	33439292	33439331	33439332	33439792	33439337	33439338	Pper_target_1217_genes_0_24148168
chr1	AGAAGCAGAGGTTATCGAACGCAGCTCACAACTTGGAATC	+	33446697	33446736	33446737	33447197	33446756	33446757	Pper_target_1219_genes_0_24148170
chr1	ATAATTTTTTGGCTTACCTTTAGAAGAGGAACAGGTGGAG	+	33452171	33452210	33452211	33452671	33452222	33452223	Pper_target_1220_genes_0_24148171
chr1	TGCAAAAACGATCTTTTGTAGTATGGAGATTTTGAACTTG	+	33455300	33455339	33455340	33455800	33455351	33455352	Pper_target_1221_genes_0_24148172
chr1	AGCTGCATTCGTGTTCGCATGTTGCGCCCACACACGAGTT	+	33497780	33497819	33497820	33498280	33497820	33497821	Pper_target_1222_genes_0_24148173
chr1	TCCGTTACTTGAGCTGCTGCTGCTGGTGGCGGACGCTACC	+	33502147	33502186	33502187	33502647	33502204	33502205	Pper_target_1223_genes_0_24148174
chr1	CTTAGCTGCAGCAGATGAGCTTGCTGAACCAGTGGTAGTG	+	33551504	33551543	33551544	33552004	33551553	33551554	Pper_target_1224_genes_0_24148175
chr1	TGTGTTGTAAAACAAGAATACAGTATTGTATCTAATTGGC	+	33554813	33554852	33554853	33555313	33554892	33554893	Pper_target_1225_genes_0_24148176
chr1	GGCGGTTTGCATGGTGACTCTATGGGTCATTTGGTCTTAT	+	33577605	33577644	33577645	33578105	33577653	33577654	Pper_target_1226_genes_0_24148177
chr1	AAGAATTGTACAATAACACCAGCAGTTGAAATAAAATTGG	+	33582683	33582722	33582723	33583183	33582726	33582727	Pper_target_1227_genes_0_24148178
chr1	TTTGCAGATGACGCCGTGTTCGCTGAAAAGTTTTGATGAC	-	33589726	33589765	33589266	33589726	33589707	33589708	Pper_target_1228_genes_0_24148179
chr1	TTTGAAATATTTTTATTGTATAAAGTTGTATTGTTTTTCG	+	33606796	33606835	33606836	33607296	33606851	33606852	Pper_target_1229_genes_0_24148180
chr1	AATAATGCAAAATTAGCAGATACAAACACTGAAGCAAATG	+	33613920	33613959	33613960	33614420	33613980	33613981	Pper_target_1230_genes_0_24148181
chr1	ATGCGTATTTCCATCACAACACATCTTTTTTGTTGACAAA	+	33625989	33626028	33626029	33626489	33626048	33626049	Pper_target_1233_genes_0_24148184
chr1	CTTTTCAAGAATTATATAGGCAACTTAGATATCGATCCAC	-	33629090	33629129	33628630	33629090	33629064	33629065	Pper_target_1234_genes_0_24148185
chr1	CACAAAACAATAATTATTACCTAATAGAATACAAGAATTA	+	33642135	33642174	33642175	33642635	33642188	33642189	Pper_target_1235_genes_0_24148186
chr1	AACCGGTATGTTTCCAATGAGCATAATTCCTGTTATTTTC	+	33645147	33645186	33645187	33645647	33645202	33645203	Pper_target_1236_genes_0_24148187
chr1	GCAGAATCGCCGCTTCTTACCACATACAACGTCGAAGATA	+	33656441	33656480	33656481	33656941	33656505	33656506	Pper_target_1238_genes_0_24148189
chr1	TGTTAAATATATAATATTAAAATCCAAAACTAATCTACAC	+	33659797	33659836	33659837	33660297	33659842	33659843	Pper_target_1239_genes_0_24148190
chr1	TCGGTAATCACATCCATGAAAGTTCCTCCACTCGGGATTA	+	33662840	33662879	33662880	33663340	33662883	33662884	Pper_target_1240_genes_0_24148191
chr1	TATTGCAATATGTCGTGTGGAATGTCAATTAAAACAGGTC	+	33685981	33686020	33686021	33686481	33686031	33686032	Pper_target_1241_genes_0_24148192
chr1	TTTATGGGTTTGGAAGGAAAAGTTAAGATAAATAAATAAA	+	33689023	33689062	33689063	33689523	33689067	33689068	Pper_target_1242_genes_0_24148193
chr1	TAAAAAATAATCTTGTCAGCTTCCTTCATATAAGTTTTTC	+	33704477	33704516	33704517	33704977	33704524	33704525	Pper_target_1243_genes_0_24148194
chr1	AATGTGTTTAGATGTCCTAACTTAAACTGTTTGTGCAGTC	+	33712175	33712214	33712215	33712675	33712229	33712230	Pper_target_1244_genes_0_24148195
chr1	TTTGCAGTAATCTGCATGTCATTCATGGAATCAATAAAAC	+	33715642	33715681	33715682	33716142	33715682	33715683	Pper_target_1245_genes_0_24148196
chr1	AAGATTAAAAGATCTATATGCCAAGAGTCATTATAGAATG	+	33724876	33724915	33724916	33725376	33724935	33724936	Pper_target_1247_genes_0_24148198
chr1	TAAAAAATATAATGACATTGCAACTAGTTTATAATAACAT	+	33727929	33727968	33727969	33728429	33727976	33727977	Pper_target_1248_genes_0_24148199
chr1	TACTATCTCTACTTAGTTTTAGAAGGCTCAATCTTGACAG	+	33730966	33731005	33731006	33731466	33731006	33731007	Pper_target_1249_genes_0_24148200
chr1	GGCCTTAGTGATAGTGTCAGAGACAATTATGAAACTTTTT	+	33734102	33734141	33734142	33734602	33734164	33734165	Pper_target_1250_genes_0_24148201
chr1	TTATGTTCATCCATCGATAACATGATAATGACACTTGGAA	+	33750990	33751029	33751030	33751490	33751037	33751038	Pper_target_1251_genes_0_24148202
chr1	TTTCAATTTTCAAAGGCTTGATTGTTTGTTATTATATCTG	+	33754037	33754076	33754077	33754537	33754100	33754101	Pper_target_1252_genes_0_24148203
chr1	GCTATTATTTTGACCCTTCCTTTCTAATTCTTATTGTACC	+	33757187	33757226	33757227	33757687	33757250	33757251	Pper_target_1253_genes_0_24148204
chr1	GATAGAATCAATATTAAAAGTAGTCAATTTTACCACATAA	+	33838131	33838170	33838171	33838631	33838171	33838172	Pper_target_1254_genes_0_24148205
chr1	CTCTAAAAATAACTTCTACGTATAAGAAAACTAGTTTTCC	+	33841161	33841200	33841201	33841661	33841218	33841219	Pper_target_1255_genes_0_24148206
chr1	CACATTATTTAGAACCTTGATAGTATGTGAACCAAAGATG	+	33844276	33844315	33844316	33844776	33844331	33844332	Pper_target_1256_genes_0_24148207
chr1	CAAAGACGCAAATTCCTTAGGGCTTAGACCCACAATTTAG	+	33847877	33847916	33847917	33848377	33847922	33847923	Pper_target_1257_genes_0_24148208
chr1	TTCTTCCTTTTTTTCCCTTGAATTCATTGGTCTTGTTTTT	-	33860338	33860377	33859878	33860338	33860325	33860326	Pper_target_1258_genes_0_24148209
chr1	AAAAGATAGTAGACCAAGAACTTGTATCATTTAATAGCTC	-	33863344	33863383	33862884	33863344	33863336	33863337	Pper_target_1259_genes_0_24148210
chr1	ATGATATGAAATTATAAAACACTATTACCACACCATTTTC	+	33866313	33866352	33866353	33866813	33866354	33866355	Pper_target_1260_genes_0_24148211
chr1	ATCATACTTGGTAAATCAAAGAAAGGGAGCTTAATCGTAG	+	33869683	33869722	33869723	33870183	33869735	33869736	Pper_target_1261_genes_0_24148212
chr1	AGTGCAAAATGGTCTTTTTCCCTTAGATAGATAAAGAATG	+	33986003	33986042	33986043	33986503	33986046	33986047	Pper_target_1262_genes_0_24148213
chr1	CAGCTTTCAGTTTACTAGTGGCCCTGAATTGAAGAGATCG	+	33991055	33991094	33991095	33991555	33991107	33991108	Pper_target_1263_genes_0_24148214
chr1	TGAATTTTATTTTTTTATATTTCAATTAATATTTATAAAG	+	33997326	33997365	33997366	33997826	33997367	33997368	Pper_target_1264_genes_0_24148215
chr1	TCAATCACCTTACACCAACAGTTACCAAAATTTTAAGTGG	+	34000459	34000498	34000499	34000959	34000503	34000504	Pper_target_1265_genes_0_24148216
chr1	TAATTGAATGGATGATTACATTTCATTAATACATTGGTTT	+	34044431	34044470	34044471	34044931	34044486	34044487	Pper_target_1266_genes_0_24148217
chr1	AGCAATATAATATTCTCCACCCATTTGTCACGACGTAAAT	+	34047661	34047700	34047701	34048161	34047712	34047713	Pper_target_1267_genes_0_24148218
chr1	GCTTCCTTTGTGTTGATTGCCTTTCTTGTTAACCATTTTC	+	34065469	34065508	34065509	34065969	34065514	34065515	Pper_target_1270_genes_0_24148221
chr1	AAGGTGACACAGTTGCAGTTGGAGAAGATGAAGAGTCAGG	+	34068557	34068596	34068597	34069057	34068621	34068622	Pper_target_1271_genes_0_24148222
chr1	CAAAAAAACCTTTCCCCCAACCAGTAATCTCAACACGAAG	+	34072170	34072209	34072210	34072670	34072214	34072215	Pper_target_1272_genes_0_24148223
chr1	TATAAGCTTAGAATATAGAAGCACATCAAAATAGTATAAA	+	34075198	34075237	34075238	34075698	34075244	34075245	Pper_target_1273_genes_0_24148224
chr1	CCCCTCTCTTCCGTATCCAACTTTTCATTCCACAAATTAC	+	34078272	34078311	34078312	34078772	34078325	34078326	Pper_target_1274_genes_0_24148225
chr1	ACATAAAATTTATATACGTACACTTAATAACAGTAAAATC	+	34262960	34262999	34263000	34263460	34263019	34263020	Pper_target_1275_genes_0_24148226
chr1	AAGACCCCTACCGGTAAGTATATAATTACTAAGTGTGTAC	-	34377523	34377562	34377063	34377523	34377504	34377505	Pper_target_1278_genes_0_24148229
chr1	TTATATGCTTGTGTTGTTTACTGGCCAAATCATGCACAAC	+	34380549	34380588	34380589	34381049	34380612	34380613	Pper_target_1279_genes_0_24148230
chr1	CAAAACCGTCTTTCGTATGATATATATAGCATATATTATC	+	34478443	34478482	34478483	34478943	34478496	34478497	Pper_target_1280_genes_0_24148231
chr1	CACGACATAAGAGGGTCCAAAACAAACTATAAATAGCAAC	+	34661373	34661412	34661413	34661873	34661430	34661431	Pper_target_1281_genes_0_24148232
chr1	CGATCAAGTACTCAAGTGACAAGTCAAGAAAAGTCGAGAG	+	34665885	34665924	34665925	34666385	34665927	34665928	Pper_target_1282_genes_0_24148233
chr1	GAACAATGGCACAACAATCAAAACCAACACCACCAAAAAC	+	34705035	34705074	34705075	34705535	34705096	34705097	Pper_target_1283_genes_0_24148234
chr1	ACTCGTCGAGTTCTTCAACCCTTTCTCATAAAACTCATTC	-	34708845	34708884	34708385	34708845	34708819	34708820	Pper_target_1284_genes_0_24148235
chr1	GTCAGATCGAATTGGGTTTCAAAGATAAACGATGGAGATG	+	34752282	34752321	34752322	34752782	34752325	34752326	Pper_target_1286_genes_0_24148237
chr1	GAACCAAATTTTGCAATTTTTGAGTTGCCACCTTTATTAC	+	34757408	34757447	34757448	34757908	34757451	34757452	Pper_target_1287_genes_0_24148238
chr1	ATATTTATGATTAATCTAATACTTATTCTTCCATCCAGTT	+	34760759	34760798	34760799	34761259	34760814	34760815	Pper_target_1288_genes_0_24148239
chr1	AATTATTCTTTGAATGTGTTTTAATATTTTTATTTGAAGG	+	34768260	34768299	34768300	34768760	34768300	34768301	Pper_target_1290_genes_0_24148241
chr1	ATGAAGATTGAAGTTTAAATTTATGAATTAATGACTAATC	+	34813810	34813849	34813850	34814310	34813869	34813870	Pper_target_1291_genes_0_24148242
chr1	TTCATGTATCGGCAACACTTGTTATCCCGACAACACCTAC	+	34816881	34816920	34816921	34817381	34816937	34816939	Pper_target_1292_genes_0_24148243
chr1	TGCTGTTGAGTTAGTAAAATCATGAATAATAACGGAATTG	+	34820061	34820100	34820101	34820561	34820119	34820120	Pper_target_1293_genes_0_24148244
chr1	GTGAACATAATTAATAGCTTCATTTACTTTTATGACTTTT	+	34834876	34834915	34834916	34835376	34834938	34834939	Pper_target_1294_genes_0_24148245
chr1	ATGGTGGATTTTCAGTTCTGAGACGTCATGCTGATGAATG	-	34837961	34838000	34837501	34837961	34837940	34837941	Pper_target_1295_genes_0_24148246
chr1	ATATGTGATTTATTATGGCATCATGAGACATTCTCTAAGC	+	34840997	34841036	34841037	34841497	34841042	34841044	Pper_target_1296_genes_0_24148247
chr1	GAATTCATTCTTCCAAAGATCCTCCGGTTATGCATGTCAC	+	35024112	35024151	35024152	35024612	35024173	35024174	Pper_target_1300_genes_0_24148251
chr1	CCGAAACAAAATATTCGGATTTCGAATTGGATGTTCGAAT	+	35034262	35034301	35034302	35034762	35034321	35034322	Pper_target_1301_genes_0_24148252
chr1	ATTCAGTAAGTTTAACTGTCTGATATTGTTGGAAAAGATG	+	35037742	35037781	35037782	35038242	35037784	35037785	Pper_target_1302_genes_0_24148253
chr1	ACGTTCGTTTAATTTACTCTAATTTTAGTGCCATTCTTTG	+	35149029	35149068	35149069	35149529	35149089	35149090	Pper_target_1304_genes_0_24148255
chr1	TTATTATTCTCAAAGTTGTACCAATTAGTTGTGATATTTA	+	35152409	35152448	35152449	35152909	35152449	35152450	Pper_target_1305_genes_0_24148256
chr1	AAAAAAAGTTGTAATGGTCGTAAAAGCAAGAGCGTGCATA	-	35262063	35262102	35261603	35262063	35262053	35262054	Pper_target_1306_genes_0_24148257
chr1	ATAAATATATATATTTTGTCTCTCCGCTGTTTTACAGCTC	+	35266671	35266710	35266711	35267171	35266728	35266729	Pper_target_1307_genes_0_24148258
chr1	CTCTTAAATTCCTGATAATCAACCCTCCCGTCTTTATTAG	+	35277872	35277911	35277912	35278372	35277927	35277928	Pper_target_1308_genes_0_24148259
chr1	GTATCTTGAAGGAATCCAAACGAAATTTGTTCATAATCTG	+	35328587	35328626	35328627	35329087	35328648	35328649	Pper_target_1310_genes_0_24148261
chr1	GCAGCAGCGATGGGCAATTGTTGCTCCGACGTTACCGATG	+	35335137	35335176	35335177	35335637	35335186	35335187	Pper_target_1312_genes_0_24148263
chr1	ACCATATTTGGACCTGTGATAAAGGCTGCAGGACTGAGAG	+	35338287	35338326	35338327	35338787	35338327	35338328	Pper_target_1313_genes_0_24148264
chr1	ACCTCACATAAGTTATTTGTCAAACTGCCAGTGATTGCTC	+	35460681	35460720	35460721	35461181	35460741	35460742	Pper_target_1314_genes_0_24148265
chr1	AAAAGAGTTTACTTTTTAATTGTAGGCTTTTGGTTTTTAG	+	35726036	35726075	35726076	35726536	35726077	35726078	Pper_target_1316_genes_0_24148267
chr1	ATTTCACACACAGACACTTGTTTCTTCGTTTTTTATATTT	+	35928261	35928300	35928301	35928761	35928320	35928321	Pper_target_1317_intergenic_0_24148268
chr1	TTATTTTCTTTGTAAGTTTAACAATACATAAAATTGTGTT	-	35956006	35956045	35955546	35956006	35955989	35955990	Pper_target_1318_genes_0_24148269
chr1	AATTAAAAAACGACAAACATAACATGATAAAGATAACATA	+	35958994	35959033	35959034	35959494	35959045	35959046	Pper_target_1319_genes_0_24148270
chr1	TCTTTTATTAATTAACTAACATCCACCACTCTCTTCAGAC	+	36022444	36022483	36022484	36022944	36022496	36022497	Pper_target_1320_genes_0_24148271
chr1	GCCAGGTCTGCTCTAATTACTATGCTTCAGTCACTTTATC	+	36026155	36026194	36026195	36026655	36026207	36026208	Pper_target_1321_genes_0_24148272
chr1	CCGTGACGGAAGTTCATTATAGAGGCGGAAGAAGATAAAG	+	36034481	36034520	36034521	36034981	36034528	36034529	Pper_target_1323_genes_0_24148274
chr1	ATGATCAATAAGCTGTCTCTTTCTTAATGGTTTCTCTTAT	+	36037478	36037517	36037518	36037978	36037540	36037541	Pper_target_1324_genes_0_24148275
chr1	AAAAATACATTATCTTAAACTATATATCGGCGTTGATCTT	+	36041492	36041531	36041532	36041992	36041533	36041534	Pper_target_1325_genes_0_24148276
chr1	GGTAACAAAATAAGCGCCATGTTTAATTTAAGTGTCTCAG	+	36044721	36044760	36044761	36045221	36044764	36044765	Pper_target_1326_genes_0_24148277
chr1	ACAGGAGATATGGACCCCTTGCTCCTGGTACTTTGGGTTG	+	36052026	36052065	36052066	36052526	36052069	36052070	Pper_target_1327_genes_0_24148278
chr1	ACAGATCTCGTTGAAGCTTTTAATCAAACACCTTGTATAC	+	36097662	36097701	36097702	36098162	36097711	36097712	Pper_target_1329_genes_0_24148280
chr1	TAATTAAATACAAAAGACTACCAACTAATTTTAATGTTGC	+	36132115	36132154	36132155	36132615	36132178	36132180	Pper_target_1330_genes_0_24148281
chr1	ACCATAGAAAAGATACAAATACTAAAAGGGAATTCATGTC	+	36136313	36136352	36136353	36136813	36136359	36136360	Pper_target_1331_genes_0_24148282
chr1	AGAATATATACATTTAACCAAAAAAGATAAAAGTTAAAAC	+	36295702	36295741	36295742	36296202	36295753	36295754	Pper_target_1332_genes_0_24148283
chr1	GAATCCAATTCGTTTTGACATTCTGATAAACAGTGACATC	+	36299172	36299211	36299212	36299672	36299217	36299218	Pper_target_1333_genes_0_24148284
chr1	CTTCGAAGACCTGGCCGATTTGAGCATTCTACTTTTTGTA	+	36303965	36304004	36304005	36304465	36304011	36304012	Pper_target_1334_genes_0_24148285
chr1	AACGACCTATACCTGCTAACCTTTTATTAAAAAGGTCAGA	+	36334738	36334777	36334778	36335238	36334797	36334798	Pper_target_1335_genes_0_24148286
chr1	GAGCAAGAAAGTTTTTGATTTAGCCCACATGATCAGCATC	+	36337881	36337920	36337921	36338381	36337925	36337926	Pper_target_1336_genes_0_24148287
chr1	AATACTAGCTGCAAAACCCTCTTTTTCTTTCTTCTTTTTG	+	36342023	36342062	36342063	36342523	36342082	36342083	Pper_target_1337_genes_0_24148288
chr1	AATGATTACAATCTATGAAGATATTATAGTTTCAATTTTC	+	36345865	36345904	36345905	36346365	36345914	36345915	Pper_target_1338_genes_0_24148289
chr1	CCCATAATCAACGTTATTTGACTAGTGATTACCCCGTCAC	+	36412555	36412594	36412595	36413055	36412609	36412610	Pper_target_1340_genes_0_24148291
chr1	ATTTTTTTAATTCCATTTGACACCGGATAATCTAATAGGC	+	36419184	36419223	36419224	36419684	36419227	36419228	Pper_target_1341_genes_0_24148292
chr1	TAATAAAAATAACTAGGTGGCGGTTAGTATGATAGAATTG	+	36422633	36422672	36422673	36423133	36422692	36422693	Pper_target_1342_genes_0_24148293
chr1	AAAAAATTATCCAGACGCGTAAACGTCGAGAAGACTAAAG	+	36426137	36426176	36426177	36426637	36426182	36426183	Pper_target_1343_genes_0_24148294
chr1	AGCCACAGCCCTATAGTTTCTGTTGAAGTTACTTTTGTTG	+	36440144	36440183	36440184	36440644	36440193	36440194	Pper_target_1344_genes_0_24148295
chr1	TAAATTCAAGCTATATTGTATAGTAAAGATGCTAAAAGTC	+	36450784	36450823	36450824	36451284	36450847	36450848	Pper_target_1346_genes_0_24148297
chr1	TCGTGTGAGGATAATCGAGCTTGTTGGATTTGGACTTGTG	+	36455700	36455739	36455740	36456200	36455754	36455755	Pper_target_1347_genes_0_24148298
chr1	AAACATGAATTGTGAAACATTACATTTGTATACTTTCTTG	+	36459819	36459858	36459859	36460319	36459869	36459870	Pper_target_1348_genes_0_24148299
chr1	CAATTGTATTATTGCAACAAAGACCCTCCGACTAATAAGG	+	36464105	36464144	36464145	36464605	36464155	36464156	Pper_target_1349_genes_0_24148300
chr1	TGCCTCAACTATAAATAGACCACCCAACCCTCATGATTTC	+	36467383	36467422	36467423	36467883	36467438	36467439	Pper_target_1350_genes_0_24148301
chr1	AGAGTTTTTTCTTATGCGACTACTACAAGTTATTTTATGG	-	36472516	36472555	36472056	36472516	36472492	36472493	Pper_target_1351_genes_0_24148302
chr1	CAAACCAGACCGGGTCAAAATTGGTTTCGTATTTTATATT	+	36477540	36477579	36477580	36478040	36477587	36477588	Pper_target_1352_genes_0_24148303
chr1	TCATGAGTAACCCTAGTCGAGATTGATACAAATGTTACAG	+	36510628	36510667	36510668	36511128	36510673	36510674	Pper_target_1353_genes_0_24148304
chr1	AGGACAAATTTTGAAAACCCATTTTAACTTTGGACTAAAC	+	36533440	36533479	36533480	36533940	36533503	36533504	Pper_target_1354_genes_0_24148305
chr1	TTCATTGATCAATAAATTAATGGGTTTATTACCGTTTCAC	+	36537190	36537229	36537230	36537690	36537231	36537232	Pper_target_1355_genes_0_24148306
chr1	ATGATCCAAATGCAAAAAAATGGTTATAGACCAAACTAAC	+	36540527	36540566	36540567	36541027	36540576	36540577	Pper_target_1356_genes_0_24148307
chr1	CAACCATTGATTAAAAGCATGGGTCTAAACATCTCCTCAC	+	36568318	36568357	36568358	36568818	36568368	36568369	Pper_target_1357_genes_0_24148308
chr1	GATAACTTTTGTCTCTTATGCTATAAACACATGTTTCTGC	+	36572340	36572379	36572380	36572840	36572393	36572394	Pper_target_1358_genes_0_24148309
chr1	TGCTATATTTGAAGAAACAGAAAACACATTTAATCGATAG	+	36575486	36575525	36575526	36575986	36575537	36575538	Pper_target_1359_genes_0_24148310
chr1	CCGCAAACATATTGTAAGATACGTTTAAGAGCAGGGATGA	-	36626960	36626999	36626500	36626960	36626943	36626944	Pper_target_1360_genes_0_24148311
chr1	TCATCTTAGTTCAAGATGAATATATCAAAATCTTTTTCAC	+	36681642	36681681	36681682	36682142	36681685	36681686	Pper_target_1361_genes_0_24148312
chr1	CCACTGCATCTAAATCAATTAAGTATGTGAGAAGAAGGTC	+	36685585	36685624	36685625	36686085	36685626	36685627	Pper_target_1362_genes_0_24148313
chr1	GCTTAATGTATTAAGACACTAACCCTTTAACTACTTGCCA	+	36689242	36689281	36689282	36689742	36689283	36689284	Pper_target_1363_genes_0_24148314
chr1	CACGCCACATTACAAAAATCATATTCATCGGCCAAAATAG	+	36693823	36693862	36693863	36694323	36693885	36693886	Pper_target_1364_genes_0_24148315
chr1	TTTTCACCGAACTATTTGTGTGGTTCAGAAAGAGACCTTC	+	36729499	36729538	36729539	36729999	36729540	36729541	Pper_target_1365_genes_0_24148316
chr1	AAAATTATATGCTCAAAGTGACAAAAAACAGTGTTATTCC	+	36736452	36736491	36736492	36736952	36736495	36736496	Pper_target_1366_genes_0_24148317
chr1	AAATTTATAAAGTTATCATTTGCTAATTAAGTAATTAACC	+	36743280	36743319	36743320	36743780	36743331	36743332	Pper_target_1367_genes_0_24148318
chr1	CCGCCACCTCCGGCGCCACCTCAAAAACTTCCACCGTCAC	+	36747505	36747544	36747545	36748005	36747546	36747547	Pper_target_1368_genes_0_24148319
chr1	AGCGTATATTCATAATTTTTTAGGATAGAAAAAAGTAATG	+	36752545	36752584	36752585	36753045	36752588	36752589	Pper_target_1369_genes_0_24148320
chr1	GCCCACAGTCTCTTCTTTTTCTTTTCTAAATCACGAAATC	+	36869468	36869507	36869508	36869968	36869511	36869512	Pper_target_1370_genes_0_24148321
chr1	TAATATAGGTATAATTACAATTTTTTATTGCTTAAAAATC	+	36895989	36896028	36896029	36896489	36896046	36896047	Pper_target_1371_genes_0_24148322
chr1	ATCCTACAAGAATTCAAAAAATTCTAAAAATGGTGAATCG	+	36899564	36899603	36899604	36900064	36899617	36899618	Pper_target_1372_genes_0_24148323
chr1	ATTAAATCCATTGAATTACTATCATCAAAAGATTGTCTTA	+	36902576	36902615	36902616	36903076	36902636	36902637	Pper_target_1373_genes_0_24148324
chr1	AAACCCTTTTAAATGTGGTACTTGCTACAATGTGTGTGAG	+	36905744	36905783	36905784	36906244	36905806	36905807	Pper_target_1374_genes_0_24148325
chr1	GAGAAAAGAGTCCGAGGGAGACGTGACACCTTGTAGTACC	+	36910273	36910312	36910313	36910773	36910327	36910328	Pper_target_1375_genes_0_24148326
chr1	GAGCTTGAGTTCATTTTGAGCAACTACAATTTCCTACAAG	+	36947913	36947952	36947953	36948413	36947968	36947969	Pper_target_1377_genes_0_24148328
chr1	ATGCGCATTCGCACATGTCTATGTCTATATGCCTACAAGC	+	36999783	36999822	36999823	37000283	36999830	36999831	Pper_target_1379_genes_0_24148330
chr1	TTGAACCCTTTGGCAATGACCTGGGTTCATGAGTTCTCTC	+	37036075	37036114	37036115	37036575	37036125	37036126	Pper_target_1380_genes_0_24148331
chr1	GTTATATGGTAATGTGTGTATGCCGAGCGAGGCTCGATAC	-	37039841	37039880	37039381	37039841	37039828	37039829	Pper_target_1381_genes_0_24148332
chr1	ATATATAATAAATCTAAGCCTTTTTCTATCCCAATATGAC	+	37112847	37112886	37112887	37113347	37112907	37112908	Pper_target_1382_genes_0_24148333
chr1	CTAAAAACAAAGAAAAACCCATTCTTGGAAATTATAAAAC	+	37116078	37116117	37116118	37116578	37116138	37116139	Pper_target_1383_genes_0_24148334
chr1	CACACCGTTAGAATTCAACCGTTAACTATTATTTTATTAA	+	37141390	37141429	37141430	37141890	37141449	37141450	Pper_target_1384_genes_0_24148335
chr1	GCAAGAATATAAAGGAATTATATGATTTAAGGATTAGTGC	+	37227155	37227194	37227195	37227655	37227216	37227217	Pper_target_1385_genes_0_24148336
chr1	CGTACCATATATGGCCGCATAAAAAGCTCCAACTTCCTTC	+	37333384	37333423	37333424	37333884	37333447	37333448	Pper_target_1386_genes_0_24148337
chr1	TGGGTTTTTACTACTCATTGCCTTTTTCATAGCTCAAATG	+	37336487	37336526	37336527	37336987	37336537	37336538	Pper_target_1387_genes_0_24148338
chr1	CAACCCCCAAAATTGATATCTTAGGTTAAATTCACACAAT	+	37366088	37366127	37366128	37366588	37366151	37366153	Pper_target_1388_genes_0_24148339
chr1	GGTTGACTTTTAATTATTGGGGCAAATAATCAATTCTGGA	+	37369519	37369558	37369559	37370019	37369576	37369577	Pper_target_1389_genes_0_24148340
chr1	GAAAATACTGGATTTTCTGAACAAACACTATCATTTTACG	-	37373656	37373695	37373196	37373656	37373642	37373643	Pper_target_1390_genes_0_24148341
chr1	GAAATAACAAAAAATAGGTTTAAAGAAAAGCCAAAAAATA	+	37427054	37427093	37427094	37427554	37427113	37427114	Pper_target_1391_genes_0_24148342
chr1	AAATATATGTATGCTTTGTGTTCGTTTAATTACTGTTTCC	+	37430240	37430279	37430280	37430740	37430304	37430305	Pper_target_1392_genes_0_24148343
chr1	GGTGTAGCTGGAGTGTGCGGTGCGCAAGGTCGAGATTCAG	+	37435634	37435673	37435674	37436134	37435689	37435690	Pper_target_1393_genes_0_24148344
chr1	GCTCACCCTCGCCGTCGCCATCACCTCTTGAAGCCGGAAT	+	37439136	37439175	37439176	37439636	37439200	37439201	Pper_target_1394_genes_0_24148345
chr1	GAAAGAGTTAATTAAGCAAAATAACTCTGGATCTCTACGA	+	37468744	37468783	37468784	37469244	37468785	37468786	Pper_target_1395_genes_0_24148346
chr1	GTTGCACAACTCTTTTACGTCTATACGTTGTTGTGTTATC	+	37472701	37472740	37472741	37473201	37472743	37472744	Pper_target_1396_genes_0_24148347
chr1	TTTCAAAATCTATGATTTCGACTCAATTACCTTGGGTATC	+	37475773	37475812	37475813	37476273	37475821	37475822	Pper_target_1397_genes_0_24148348
chr1	ATACTTCATGTAATTTTTGGTTTTGGAACGTTTTATTTAG	-	37536272	37536311	37535812	37536272	37536246	37536247	Pper_target_1398_genes_0_24148349
chr1	GAAACTTTCCTAACTTTTAAGTTCAATTTAAATCATTTCC	+	37539808	37539847	37539848	37540308	37539863	37539864	Pper_target_1399_genes_0_24148350
chr1	ACTATTTTTAGAGCTATTTCTTTCTATTTCATCAGCTTTC	+	37567715	37567754	37567755	37568215	37567777	37567778	Pper_target_1400_genes_0_24148351
chr1	GCTATACATGCATTATCTTCTCTAAGAGTTGTTCTCATTC	+	37590472	37590511	37590512	37590972	37590525	37590526	Pper_target_1402_genes_0_24148353
chr1	TGTGGTTGTTTAAACCACTAAACTGTAAATGTAGGGATGC	+	37593779	37593818	37593819	37594279	37593823	37593824	Pper_target_1403_genes_0_24148354
chr1	CCTAATTTCTATTAATAAATTAGTATAGATATAATTTTCC	+	37596801	37596840	37596841	37597301	37596850	37596851	Pper_target_1404_genes_0_24148355
chr1	GGTTCTGTGGGTTGAAGAACCTTATGGAGTTGGATCTTAG	+	37605326	37605365	37605366	37605826	37605368	37605369	Pper_target_1405_genes_0_24148356
chr1	TGAAATCGGCAAAAAGATGTAGTTTATAATTAATGAAATG	+	37608385	37608424	37608425	37608885	37608444	37608445	Pper_target_1406_genes_0_24148357
chr1	GTTAGGACAAATTTATACATGCAATGTTTTTATAGTATGG	+	37611618	37611657	37611658	37612118	37611663	37611664	Pper_target_1407_genes_0_24148358
chr1	TGGATTTATCTGACAATAAGTTATCAGGAGAAGTACCAAG	+	37637772	37637811	37637812	37638272	37637836	37637837	Pper_target_1408_genes_0_24148359
chr1	TATCTTCCATTCTTTGTAAAGATAAGAATATGCTAATAAC	+	37641555	37641594	37641595	37642055	37641613	37641614	Pper_target_1409_genes_0_24148360
chr1	TCGTTTTGCATTTCAGAATTGATGTTTTCTCTGCTAATTC	+	37763109	37763148	37763149	37763609	37763150	37763152	Pper_target_1410_genes_0_24148361
chr1	GGCATAGTAGAATATTGTATTAGACCACTAGAAAACATTT	+	37766154	37766193	37766194	37766654	37766213	37766214	Pper_target_1411_genes_0_24148362
chr1	AGTTATAACCAGAAATTATATGAGAAACTTTCAAATCCTC	+	37769207	37769246	37769247	37769707	37769259	37769260	Pper_target_1412_genes_0_24148363
chr1	TAACAATCAAGAGTTAACGTCATCCTTTTACTCTGAAGAA	+	37772307	37772346	37772347	37772807	37772361	37772362	Pper_target_1413_genes_0_24148364
chr1	CTGAAATAACAATGTAACAAGTAAAACAAAGACCTAGTGG	+	37794007	37794046	37794047	37794507	37794047	37794048	Pper_target_1414_genes_0_24148365
chr1	TTTGAAGAAACAGCCAACAGAGCACCATCTTTGTTAAATC	+	37797571	37797610	37797611	37798071	37797635	37797636	Pper_target_1415_genes_0_24148366
chr1	TTTCAACAGCCTTTGATCGATCATGCCTAACAAAGAAATG	+	37800602	37800641	37800642	37801102	37800649	37800650	Pper_target_1416_genes_0_24148367
chr1	TTTTAAGACTTAAACTCTCGACCTCAAAGAAGAAAAACAC	+	37851715	37851754	37851755	37852215	37851764	37851766	Pper_target_1418_genes_0_24148369
chr1	AAACGAATGTCCAACTCTGTGGACTTGTTAGCTGATGGTG	+	37884233	37884272	37884273	37884733	37884293	37884294	Pper_target_1419_genes_0_24148370
chr1	GGCTGGATTCATTTTAAGCCCAAATAGTAACGTAGAAGTC	+	37887436	37887475	37887476	37887936	37887479	37887480	Pper_target_1420_genes_0_24148371
chr1	CTGCTTCCGAAAGTAGCTCCTCATCAACTCCTTCCTCTAC	+	37890642	37890681	37890682	37891142	37890683	37890684	Pper_target_1421_genes_0_24148372
chr1	GTATGCCTCCCAAAATTATGGAAAACAAAACAATTATTAG	+	37893728	37893767	37893768	37894228	37893772	37893773	Pper_target_1422_genes_0_24148373
chr1	GGAGGAAGAAGAAGACCCTTGTGGTGTAGAAGACCTATTG	+	37896831	37896870	37896871	37897331	37896874	37896876	Pper_target_1423_genes_0_24148374
chr1	TAATATCTATCTTATAATACAAGTAAGCTCAATTATATCC	+	37918652	37918691	37918692	37919152	37918703	37918704	Pper_target_1425_genes_0_24148376
chr1	CACAAATATTAAACATATTTTATTTTTGTAAACCACAAAC	+	37921937	37921976	37921977	37922437	37921998	37921999	Pper_target_1426_genes_0_24148377
chr1	CACACCACCTTTTGGCACCATTTTGTAGTATCAAGTTATG	+	37931891	37931930	37931931	37932391	37931937	37931938	Pper_target_1427_genes_0_24148378
chr1	AATCAAACAATACTTCTTATAAAAAACATAAATATACATC	+	37935738	37935777	37935778	37936238	37935789	37935790	Pper_target_1428_genes_0_24148379
chr1	AACCCCTCTCTCTAATTGTTTGTGTGTGTGTGTACAGGTC	+	37941791	37941830	37941831	37942291	37941832	37941833	Pper_target_1429_genes_0_24148380
chr1	GCTGGGTAGAACTTAAATCCAGCTCCTCCAGGTTAGTGAG	+	37948229	37948268	37948269	37948729	37948287	37948288	Pper_target_1430_genes_0_24148381
chr1	GGTGCATGATAACTTAAAGAAGGAATGAAAAGAAGAAAAC	+	37954344	37954383	37954384	37954844	37954387	37954388	Pper_target_1431_genes_0_24148382
chr1	CCTTGCTGAGTAGGAAAAAGACATGGTGGTGGAGAGTATG	+	37958540	37958579	37958580	37959040	37958581	37958582	Pper_target_1432_genes_0_24148383
chr1	CCTTAATTCTGAACCTTCTTCACTCCAATTAAGTCCCTCA	-	37963937	37963976	37963477	37963937	37963925	37963926	Pper_target_1433_genes_0_24148384
chr1	TCAATGAAAGCAAGGTAACGTGGGCCTGTAATATTTTGAA	+	37966952	37966991	37966992	37967452	37966995	37966996	Pper_target_1434_genes_0_24148385
chr1	TCGCTAAGATCCAAGACTTTGAGTGAAGTGAGTGTCTTTA	+	37981536	37981575	37981576	37982036	37981596	37981597	Pper_target_1435_genes_0_24148386
chr1	GGTACCTAGAGCTGGAAATGGTCCCGACATTGGATTTCTG	+	38023736	38023775	38023776	38024236	38023795	38023796	Pper_target_1436_genes_0_24148387
chr1	GTGAGAAACATTGAAAATAGACAAGGAGGTAAGCTTAATG	+	38033730	38033769	38033770	38034230	38033782	38033783	Pper_target_1437_genes_0_24148388
chr1	GGGCAATAAGGTCTTTTAGCCAGTTGCCCAGTTAGGTTAG	+	38036872	38036911	38036912	38037372	38036932	38036933	Pper_target_1438_genes_0_24148389
chr1	TTCGTTAGCAAGCTTGTTCCATCGACTTTAAGAAAACCTC	+	38043058	38043097	38043098	38043558	38043104	38043105	Pper_target_1439_genes_0_24148390
chr1	AAAGAGACAAGGTTAATTTCTATACCTCTTTGTGTAATCC	-	38046770	38046809	38046310	38046770	38046753	38046754	Pper_target_1440_genes_0_24148391
chr1	AAGCTCTTACAAGCTGTAAAAAGAAAGGGAGTTAATAGAG	+	38050597	38050636	38050637	38051097	38050640	38050641	Pper_target_1441_genes_0_24148392
chr1	GACTCGGGTTTTGACTTTGGACATTGGCGACAACTCCTTG	-	38067935	38067974	38067475	38067935	38067917	38067920	Pper_target_1442_genes_0_24148393
chr1	GTAGAGTATCTTCTTTGTTACGTGTAGAGTCTCTTGTTTG	+	38071139	38071178	38071179	38071639	38071192	38071194	Pper_target_1443_genes_0_24148394
chr1	ATAAAATTAAGTCTATTATGTTCATCATTTTGCGAGGAAC	+	38074841	38074880	38074881	38075341	38074898	38074899	Pper_target_1444_genes_0_24148395
chr1	CATTTTAAAAGTGAAACCAGAATCATACATGACTTCAACG	+	38079040	38079079	38079080	38079540	38079100	38079101	Pper_target_1445_genes_0_24148396
chr1	ATTGACGACAAATAAAGTGATTTATTAATAAAATTTAATG	+	38082254	38082293	38082294	38082754	38082305	38082307	Pper_target_1446_genes_0_24148397
chr1	GCAATGAGTAAATGATGGAAATGGTAAGAAGAAGAAAGAC	+	38089687	38089726	38089727	38090187	38089739	38089740	Pper_target_1447_genes_0_24148398
chr1	TAGCAACTACAGCTATAGGTCAAGGAGGCTCTCCAAACAC	+	38094331	38094370	38094371	38094831	38094372	38094373	Pper_target_1448_genes_0_24148399
chr1	AAAAAATTATATATTCTTTCATTAAGGTATCACTTGATGT	+	38124273	38124312	38124313	38124773	38124316	38124317	Pper_target_1449_genes_0_24148400
chr1	ACATCGAACGATTTTTACAACCTTGCCAAAAAGTAAAATG	+	38127441	38127480	38127481	38127941	38127496	38127497	Pper_target_1450_genes_0_24148401
chr1	GTTAACCGAATTCTTAGTTATGTACATAAAAATATAATTG	-	38302234	38302273	38301774	38302234	38302219	38302220	Pper_target_1451_genes_0_24148402
chr1	TTGGGGTGGATTTTGATTCGATGTGGAGGTGGGATTGGTC	+	38305204	38305243	38305244	38305704	38305257	38305258	Pper_target_1452_genes_0_24148403
chr1	CATAATTTATGGCAGGAAAGAAGATTGAGTTTATTAATGC	+	38308339	38308378	38308379	38308839	38308387	38308388	Pper_target_1453_genes_0_24148404
chr1	CTAAAATAGTAAGAATTGAAGTCTGATTTCCGAATAATTG	+	38311885	38311924	38311925	38312385	38311947	38311948	Pper_target_1454_genes_0_24148405
chr1	CTTCTTAACTTAAAATTTAACCTTCTAATTCATTCTTTAC	+	38315515	38315554	38315555	38316015	38315558	38315560	Pper_target_1455_genes_0_24148406
chr1	TAATAACCACATAACTAGTTTCAAAAATTCTAGCCAAATG	+	38442996	38443035	38443036	38443496	38443057	38443058	Pper_target_1456_genes_0_24148407
chr1	AATTATATAAAGGGGCATACCCCTTGGATCTTAGGGTTTC	-	38449931	38449970	38449471	38449931	38449926	38449927	Pper_target_1457_genes_0_24148408
chr1	GCCTCCCACTGTCCTCTATCACCCCCTTGAGAGCCAGAAA	-	38461962	38462001	38461502	38461962	38461946	38461947	Pper_target_1458_genes_0_24148409
chr1	CCTTTGCTTACCAGTACTCCCTTGTATACTGACACAACAG	+	38467429	38467468	38467469	38467929	38467469	38467470	Pper_target_1459_genes_0_24148410
chr1	GGGTATTCTCGAGCATACTTTATTCAAAGGCACATAGTAA	+	38471915	38471954	38471955	38472415	38471961	38471962	Pper_target_1460_genes_0_24148411
chr1	TAGGTGAGTTTTAGGGCAGTGCTATACATATAATGTTGTG	+	38475853	38475892	38475893	38476353	38475908	38475909	Pper_target_1461_genes_0_24148412
chr1	CATCAGTAAATGTACTTCACGAGAAATACACTTTGTTATC	+	38479244	38479283	38479284	38479744	38479299	38479300	Pper_target_1462_genes_0_24148413
chr1	TAGCAGATCTGCTGAATGCTATTTCTGAGAGATTTGACTG	-	38483936	38483975	38483476	38483936	38483916	38483917	Pper_target_1463_genes_0_24148414
chr1	AAATTGAAGTGAAAAATCACGACATTATACAATCTAAGAG	+	38510330	38510369	38510370	38510830	38510376	38510377	Pper_target_1465_genes_0_24148416
chr1	CACGTAATGAATTAGGACTGAGACGGTGAGTTGTTAGTAG	+	38517852	38517891	38517892	38518352	38517909	38517910	Pper_target_1467_genes_0_24148418
chr1	ACTCCATATATTACTTAAAACTAGGGCTGAGCTGGGTTAC	+	38523125	38523164	38523165	38523625	38523178	38523179	Pper_target_1468_genes_0_24148419
chr1	AGAACTTGAAAGATTTGCCACTATTTTTAAGAGTTTCTTG	+	38538021	38538060	38538061	38538521	38538067	38538068	Pper_target_1469_genes_0_24148420
chr1	AAAGGAACACTAATTGATTACATCTTACCATCATATCCAC	+	38541601	38541640	38541641	38542101	38541655	38541656	Pper_target_1470_genes_0_24148421
chr1	GTAATAATATAACCCGACTTTCTTAAAGGTCCACAAATAG	+	38545115	38545154	38545155	38545615	38545176	38545177	Pper_target_1471_genes_0_24148422
chr1	CAAATGGGTGTTGGGATTTTAGCTATTCATTTACTAGCAC	+	38645643	38645682	38645683	38646143	38645683	38645684	Pper_target_1472_genes_0_24148423
chr1	TTCGATAAATATTGTATCCCGTTTTATCTACGTCTATATG	-	38649119	38649158	38648659	38649119	38649096	38649097	Pper_target_1473_genes_0_24148424
chr1	TTACACCCTTAATTAAAGAAATAGCTAAAATATATAGTCC	+	38756647	38756686	38756687	38757147	38756710	38756711	Pper_target_1476_genes_0_24148427
chr1	GGTGGAAATTATTATGGTTTTACGGTTTTTCTTTTTCTTC	+	38759735	38759774	38759775	38760235	38759793	38759794	Pper_target_1477_genes_0_24148428
chr1	AGTTTTATTCTCTACTCCCACCCTCACCATAACCCTGCTG	+	38792523	38792562	38792563	38793023	38792587	38792588	Pper_target_1478_genes_0_24148429
chr1	AGGTAATTAATTATTATTCATTCATTTGGTTTTGTTAAAG	+	38798280	38798319	38798320	38798780	38798320	38798321	Pper_target_1479_genes_0_24148430
chr1	AGAATCTAGGGCTTTCTAACAAGCAATCGTTTTTGTATTC	+	38828737	38828776	38828777	38829237	38828790	38828791	Pper_target_1480_genes_0_24148431
chr1	CTTGTTTTTTCCACCTTTGTTCGAAGTTAAATAACACGTC	+	38832921	38832960	38832961	38833421	38832969	38832970	Pper_target_1481_genes_0_24148432
chr1	ACTTGGACCAAGAATACAACCTCACATGAATGAAGCATTT	+	38882600	38882639	38882640	38883100	38882656	38882657	Pper_target_1482_genes_0_24148433
chr1	TAATATATTAACACTACCAATCTACGCATAAATTTCCTTC	+	38895548	38895587	38895588	38896048	38895610	38895611	Pper_target_1483_genes_0_24148434
chr1	ATGTATACAATTTGAAGGTCAGTGCACATTACTGCTAGAC	+	38898692	38898731	38898732	38899192	38898748	38898749	Pper_target_1484_genes_0_24148435
chr1	AGGAAGTTGTAGTATACTAAAACCCAACAGTTAACCGTGG	+	38912074	38912113	38912114	38912574	38912125	38912126	Pper_target_1486_genes_0_24148437
chr1	ATTTGGCCCATCAGGCCCAGCGCACCGCGATCATCACCTG	+	38955516	38955555	38955556	38956016	38955560	38955561	Pper_target_1487_genes_0_24148438
chr1	GGACCATCTACACACAAAATTTTTCATTTAGACCAAGTTG	+	38959466	38959505	38959506	38959966	38959525	38959526	Pper_target_1488_genes_0_24148439
chr1	TGGCTTTCGAGGTGCATATTGGCAAGGCAGAACAAACTAC	+	38962615	38962654	38962655	38963115	38962669	38962670	Pper_target_1489_genes_0_24148440
chr1	CAATATAATAATAATATTTTTTTAAGACGTTCAATCTTTA	+	39013742	39013781	39013782	39014242	39013783	39013784	Pper_target_1490_genes_0_24148441
chr1	GGCAAGTTTGATTAAACATCATGGACGGACGCAGAAATAC	-	39055497	39055536	39055037	39055497	39055471	39055472	Pper_target_1491_genes_0_24148442
chr1	ATGTGGAGGATTCCAATAAAAATGGTTTTGTCTCAAACAG	+	39068199	39068238	39068239	39068699	39068239	39068240	Pper_target_1492_genes_0_24148443
chr1	TTTGCTTACATTTATCCGGTTTTACAGAGCCTTCTACATC	+	39071230	39071269	39071270	39071730	39071293	39071294	Pper_target_1493_genes_0_24148444
chr1	CTTGCAGTGATATTTCTCAATTAAGGTGGTCAAATTGTAG	+	39075107	39075146	39075147	39075607	39075169	39075170	Pper_target_1494_genes_0_24148445
chr1	GCCCCTGTATGGAGCTCCGAGGAGGTTCTGAAACCTGTAG	+	39078525	39078564	39078565	39079025	39078569	39078570	Pper_target_1495_genes_0_24148446
chr1	TTTGTTGAAATAAAGTAATGTTTGTGTTTTAGTCTAGTTT	+	39084553	39084592	39084593	39085053	39084614	39084615	Pper_target_1496_genes_0_24148447
chr1	TAATCATAGTATGCTAACAATGGTCCTTTTTAAATGTATG	+	39088150	39088189	39088190	39088650	39088196	39088197	Pper_target_1497_genes_0_24148448
chr1	GCCTTTCTGCCACCACAGTTGAAGAATGTTTTGGATTAAG	+	39144255	39144294	39144295	39144755	39144296	39144297	Pper_target_1500_genes_0_24148451
chr1	TGATACCTATAGTCTAAGGTATGTTTTCCTTCACTGTATC	+	39147625	39147664	39147665	39148125	39147665	39147666	Pper_target_1501_genes_0_24148452
chr1	TTATAAACTTACCGACTTCATCCCTTAAAATCAGTATAGC	+	39178106	39178145	39178146	39178606	39178157	39178158	Pper_target_1502_genes_0_24148453
chr1	AGATCGAAATTGAAGATAATGCTTGTACGAATAATAGATG	+	39181818	39181857	39181858	39182318	39181875	39181876	Pper_target_1503_genes_0_24148454
chr1	TTAAATACTAATAAGATCGCTCAACTTATCCTATTCATTG	+	39185007	39185046	39185047	39185507	39185051	39185052	Pper_target_1504_genes_0_24148455
chr1	TTATAATCGGTGGTAGTCATTAATTCCAAAATATTTGGAC	+	39188700	39188739	39188740	39189200	39188759	39188760	Pper_target_1505_genes_0_24148456
chr1	AATTGACCCTAACCCTAAATAGAAACATAAGAAGAAGAAA	+	39191743	39191782	39191783	39192243	39191806	39191807	Pper_target_1506_genes_0_24148457
chr1	ATCCTTTTATTTTTCTTATATGGGAGATGGTGGACTAATG	+	39196258	39196297	39196298	39196758	39196314	39196315	Pper_target_1507_genes_0_24148458
chr1	AAGATCTAAGCAACTTGCTCATCAAGATTCGAACTTTATA	+	39202913	39202952	39202953	39203413	39202960	39202961	Pper_target_1508_genes_0_24148459
chr1	GAATCGTGGTACTCCTCGAGATAAGAACTATAAGAAAAAT	+	39222194	39222233	39222234	39222694	39222241	39222242	Pper_target_1509_genes_0_24148460
chr1	TTTCTAAAGCTTTTAAATTAATAATTGGTTTGCATTTTTG	+	39225278	39225317	39225318	39225778	39225335	39225336	Pper_target_1510_genes_0_24148461
chr1	TGCCAGATAACAAGATGGTGGGAAAGGCAATCAGAGATCC	+	39228330	39228369	39228370	39228830	39228370	39228371	Pper_target_1511_genes_0_24148462
chr1	CGGCCCCCGCCATATCTAGCATAATGGGCCCCACCCTAAC	+	39272897	39272936	39272937	39273397	39272952	39272953	Pper_target_1512_genes_0_24148463
chr1	ATTTAGTGAAGATAAATGTTAAAATAACTTCAAGACAAAA	+	39276902	39276941	39276942	39277402	39276966	39276967	Pper_target_1513_genes_0_24148464
chr1	AAACAGAAGACGTCAACAGCAGGATTCGAACCTGCGCAGG	+	39280319	39280358	39280359	39280819	39280360	39280361	Pper_target_1514_genes_0_24148465
chr1	GAAAGTAACTAAGGTTTATAAATGACTTACCTAAAATCTG	+	39285094	39285133	39285134	39285594	39285157	39285158	Pper_target_1515_genes_0_24148466
chr1	ATCTGCTAAGGAACAATATCAGATTGAAAATGGGTCATGG	-	39288620	39288659	39288160	39288620	39288593	39288595	Pper_target_1516_genes_0_24148467
chr1	AGCAAGCGTACATACGCCATGGACCCACGTGGTAAAAACC	+	39312473	39312512	39312513	39312973	39312513	39312514	Pper_target_1517_genes_0_24148468
chr1	ACAAGGAAGGAATCTTGAAGTTGAAGTCAACTGAAGTCCG	+	39315473	39315512	39315513	39315973	39315532	39315533	Pper_target_1518_genes_0_24148469
chr1	ACCTGCACTATAATGATGTTTGATCGATGTAGTACCTGAG	+	39333591	39333630	39333631	39334091	39333642	39333643	Pper_target_1520_genes_0_24148471
chr1	TGTAAATTTTGACTTTTAGAGAAATATGATACTCACTTGG	+	39336596	39336635	39336636	39337096	39336655	39336656	Pper_target_1521_genes_0_24148472
chr1	TCTTCATTCAAACAACAGCGCCTCGCCTTCTAGATTATCC	+	39339774	39339813	39339814	39340274	39339823	39339824	Pper_target_1522_genes_0_24148473
chr1	CCAGGTTAGCTTTCAAGTGACTGAATCGATTTACACCATC	+	39383278	39383317	39383318	39383778	39383325	39383326	Pper_target_1523_genes_0_24148474
chr1	TGGAGGTTCTTGATTTTGGTAAGTTTAGGGTTTTGCCAAG	+	39386439	39386478	39386479	39386939	39386480	39386481	Pper_target_1524_genes_0_24148475
chr1	ACATCGATCAAAATCCCTAGTCCCCTACCTTTGACGGTTC	+	39427317	39427356	39427357	39427817	39427375	39427376	Pper_target_1525_genes_0_24148476
chr1	CAGGCAGAATAAAGCAAAGACTCGTAAACGGTCACTTGAG	+	39430416	39430455	39430456	39430916	39430456	39430457	Pper_target_1526_genes_0_24148477
chr1	AACACCACTAACATCATCAAGGATAGTTATATGCTTTTTC	+	39435736	39435775	39435776	39436236	39435800	39435802	Pper_target_1527_genes_0_24148478
chr1	GGTTTTAATCTCTTGAATTGATTTTTGAGTTTGTTTTAAG	+	39440184	39440223	39440224	39440684	39440246	39440247	Pper_target_1528_genes_0_24148479
chr1	AGCAACTCAAAAGTCAATACGTCCTCAAAATCCCACAACC	+	39443334	39443373	39443374	39443834	39443386	39443387	Pper_target_1529_genes_0_24148480
chr1	CTTATCCGAAGGGTACAAGGGGCTCAAAAATTTGTGGATA	+	39460027	39460066	39460067	39460527	39460087	39460088	Pper_target_1530_genes_0_24148481
chr1	GAATTCAATCATGTGACTTAGTGTTTGTTTCTAATTTTTA	+	39464281	39464320	39464321	39464781	39464342	39464343	Pper_target_1531_genes_0_24148482
chr1	TATTCAAAAAACATAAAAGAAGAAAATGTTTTCATGTTAG	-	39477339	39477378	39476879	39477339	39477324	39477325	Pper_target_1533_genes_0_24148484
chr1	TTGCCAATATGTTTTAATTGTAATATTGACGGCATGTTTG	+	39485002	39485041	39485042	39485502	39485063	39485064	Pper_target_1534_genes_0_24148485
chr1	TTAGATATAATAAATATTATATTCATAATAAAAATAATAA	+	39491682	39491721	39491722	39492182	39491741	39491742	Pper_target_1535_genes_0_24148486
chr1	TCACCCTACAAAATAGAATGGTAAACTGAGTTGCGAGTGT	+	39597510	39597549	39597550	39598010	39597567	39597568	Pper_target_1537_genes_0_24148488
chr1	TTATGTGCATTTTTAACATTTATTTTACATTATCACTAAG	+	39600608	39600647	39600648	39601108	39600654	39600655	Pper_target_1538_genes_0_24148489
chr1	AGGTACTAATTTAGTTCAAAACAGGACCTTCCATCCGTTT	+	39603619	39603658	39603659	39604119	39603669	39603670	Pper_target_1539_genes_0_24148490
chr1	GATTCGTTTGTCTTTTTGTTTGTTCCCATGCCGTTACCAC	+	39618475	39618514	39618515	39618975	39618531	39618532	Pper_target_1540_genes_0_24148491
chr1	GGTGAATAATGTCAAAAGGGCAATAAGGGAAATTCCATAG	+	39621572	39621611	39621612	39622072	39621624	39621625	Pper_target_1541_genes_0_24148492
chr1	AAGACATAATTATCGTGTGTAAGCCTTCCAACTTATTAGC	+	39631830	39631869	39631870	39632330	39631887	39631888	Pper_target_1542_genes_0_24148493
chr1	GATTGAATTGGATTGCCTTTGCTTCTTTAACTTTGTAATG	+	39635317	39635356	39635357	39635817	39635362	39635363	Pper_target_1543_genes_0_24148494
chr1	ACACTAATCATGTAATAAATCAAACAAAATGCATAAACTC	+	39638392	39638431	39638432	39638892	39638455	39638456	Pper_target_1544_genes_0_24148495
chr1	TCAACCTATAAGTCTATTATAGCCAACCATGAAAGGAGAC	+	39672748	39672787	39672788	39673248	39672800	39672801	Pper_target_1546_genes_0_24148497
chr1	CTGATTTGTCTCAATTTTTTTACATATTTAATCATTTTAC	+	39675977	39676016	39676017	39676477	39676026	39676027	Pper_target_1547_genes_0_24148498
chr1	TAATCGATCCTTTCTGTAAATTAACATATCAAAGAGATTA	+	39679582	39679621	39679622	39680082	39679640	39679641	Pper_target_1548_genes_0_24148499
chr1	TGCACCAAGGAAATTAAATAAATCAAAATCCAAAAATATG	+	39682717	39682756	39682757	39683217	39682767	39682768	Pper_target_1549_genes_0_24148500
chr1	GAAGAACAGTCTGTTCTCTCTCTAAATCCTCGAACACTTC	+	39716159	39716198	39716199	39716659	39716209	39716210	Pper_target_1550_genes_0_24148501
chr1	TTCAATTTCATTTTCATTCCTTTCTAAATCCTATTAGTTC	+	39719382	39719421	39719422	39719882	39719443	39719444	Pper_target_1551_genes_0_24148502
chr1	GCAAAAGGATTGGTGGAAGGGGTAGAGGAAGGTTGACTAC	+	39722580	39722619	39722620	39723080	39722632	39722633	Pper_target_1552_genes_0_24148503
chr1	AGTTGGTGATTTACTGGATGTCATCAGGTCTTTGAATTTT	+	39726372	39726411	39726412	39726872	39726428	39726429	Pper_target_1553_genes_0_24148504
chr1	AAGAAATATGTCTTTTCTAAATTGGAAAAATAAAAAGAGC	+	39729575	39729614	39729615	39730075	39729659	39729660	Pper_target_1554_genes_0_24148505
chr1	ACAAATGTGAACCCACTTTGGCTAATTGATAAATTGTAAG	+	39732628	39732667	39732668	39733128	39732673	39732674	Pper_target_1555_genes_0_24148506
chr1	CATCAGAAGATGAAAGTATATATGGGAGGGTAGGGTGGAC	+	39735856	39735895	39735896	39736356	39735916	39735917	Pper_target_1556_genes_0_24148507
chr1	TTATACTTCAAAAAAATTTAATTACAGGCCTGTTATCTTC	+	39738918	39738957	39738958	39739418	39738977	39738978	Pper_target_1557_genes_0_24148508
chr1	TACATCACACATTAAAATACATAATATTAGATAAGAAAGG	+	39796405	39796444	39796445	39796905	39796447	39796448	Pper_target_1558_genes_0_24148509
chr1	TCATATTCGTGTTCTAGATTCGAAACAATATTAACATGAG	+	39799820	39799859	39799860	39800320	39799913	39799914	Pper_target_1559_genes_0_24148510
chr1	TAAAGGTTTTAAGAGATTTAGTAATTAATGTTCAGATACC	+	39803005	39803044	39803045	39803505	39803068	39803069	Pper_target_1560_genes_0_24148511
chr1	TAGGTCTAGTCAAAGAGCGTTTTTTGTTAGATAATTTGAC	+	39811082	39811121	39811122	39811582	39811129	39811130	Pper_target_1561_genes_0_24148512
chr1	GTGATTGGACTTGTTTATGATATTTTTTGGGATTTTAATT	+	39814145	39814184	39814185	39814645	39814204	39814205	Pper_target_1562_genes_0_24148513
chr1	AAACATTTAAAGACCCGCTAAATATTTTTTTACTCATATC	+	39864649	39864688	39864689	39865149	39864700	39864701	Pper_target_1565_genes_0_24148516
chr1	TGACAATAACACCGATCGATCAGAATATAATTTCCAATTC	+	39868748	39868787	39868788	39869248	39868796	39868797	Pper_target_1566_genes_0_24148517
chr1	GCCCGGGTTGCCCACCGTCAGGACCGGCCCTGAATTGGAG	+	39877049	39877088	39877089	39877549	39877092	39877093	Pper_target_1567_genes_0_24148518
chr1	CGACAGTGGCTTCCATGGCTAATTTATAAGAAGTTAAATG	+	39880050	39880089	39880090	39880550	39880093	39880094	Pper_target_1568_genes_0_24148519
chr1	AGGCCAGAAGGGGCCATGGCCTCCCCGTTTTTTTAGCCTA	+	39884243	39884282	39884283	39884743	39884302	39884303	Pper_target_1569_genes_0_24148520
chr1	TAAATTGCGTACCACATTTTTACTGGATTTTGTAAATTAG	+	39899193	39899232	39899233	39899693	39899248	39899249	Pper_target_1570_genes_0_24148521
chr1	ATTCGCATACTGAGGGATCTCTGTAAGATCAATTCGTGAG	+	39904179	39904218	39904219	39904679	39904228	39904229	Pper_target_1571_genes_0_24148522
chr1	ATTTACACCATATGAATCTTTTAAACATAATGACAACTTC	+	39923326	39923365	39923366	39923826	39923377	39923378	Pper_target_1572_genes_0_24148523
chr1	CATTAAAACTAATAAATTGAATATAATATATTAAAAATTG	+	39929073	39929112	39929113	39929573	39929118	39929119	Pper_target_1573_genes_0_24148524
chr1	TAAGAGTACTGAAGAGACAGTAAATAATGAAGTCAGTGGA	+	39954010	39954049	39954050	39954510	39954067	39954068	Pper_target_1574_genes_0_24148525
chr1	CTAATAAGTTTCGCCTCTTATTAGACACTAGATTCACTTC	+	39961030	39961069	39961070	39961530	39961094	39961095	Pper_target_1576_genes_0_24148527
chr1	AATCATTACAAGCAGAAAATTACGGAAAAGTAGCAACATC	+	39964435	39964474	39964475	39964935	39964495	39964496	Pper_target_1577_genes_0_24148528
chr1	TTACATCCATTTTGGCGCCAAAAATGGTGGTTAGAAAGAC	+	39967517	39967556	39967557	39968017	39967560	39967561	Pper_target_1578_genes_0_24148529
chr1	GGAAAACGCACAAAATTCAAACAATCACAACTTTTGAACC	+	39972094	39972133	39972134	39972594	39972151	39972152	Pper_target_1579_genes_0_24148530
chr1	CACAGAGTCTTCTACCTCTTTAAGCATCATTGAGTCTGTC	+	39975196	39975235	39975236	39975696	39975255	39975256	Pper_target_1580_genes_0_24148531
chr1	AAGCGTATAACATGATCAAGAATATGACAATCATCCCAGA	+	39978358	39978397	39978398	39978858	39978419	39978420	Pper_target_1581_genes_0_24148532
chr1	TCGTCGTGCGGGATGGTGTAACGTCCCATTTACACAATAA	+	39988022	39988061	39988062	39988522	39988085	39988086	Pper_target_1582_genes_0_24148533
chr1	GGGGTTCATTTACATGATATCCACTCATTAAACTAATATC	+	39991105	39991144	39991145	39991605	39991148	39991149	Pper_target_1583_genes_0_24148534
chr1	ATTTTGTGATATGATGTTTTCCCTTTTGGTCATTTTATTG	+	39994692	39994731	39994732	39995192	39994733	39994734	Pper_target_1584_genes_0_24148535
chr1	TAAACAGGAAGAATTTTTATTCTATTTATCTTCTTAAATG	+	39998562	39998601	39998602	39999062	39998616	39998617	Pper_target_1585_genes_0_24148536
chr1	TCAGCAAGAGCCCTTTTTCATCAATAGAACCAATAATATC	+	40001842	40001881	40001882	40002342	40001882	40001883	Pper_target_1586_genes_0_24148537
chr1	GTACAAGTCCTTTGAATTTTGGTAATAAGTTGTTTTTATG	+	40005597	40005636	40005637	40006097	40005651	40005652	Pper_target_1587_genes_0_24148538
chr1	TCCTGCCTGCCTAATGATTACACAAGTCTAAAAGTATTTC	+	40017583	40017622	40017623	40018083	40017625	40017626	Pper_target_1589_genes_0_24148540
chr1	TATGCTTTTACAATCAAAAAATTATTGATCCAGATATTTG	+	40021720	40021759	40021760	40022220	40021771	40021772	Pper_target_1590_genes_0_24148541
chr1	ATATAACCATATACTTGAAACTTCTTACTTTCTCCTCTTG	+	40025380	40025419	40025420	40025880	40025431	40025432	Pper_target_1591_genes_0_24148542
chr1	TTTCTCCATAATCATGAATGATAGAATCAACTTTTACCTC	+	40028666	40028705	40028706	40029166	40028729	40028730	Pper_target_1592_genes_0_24148543
chr1	ATTGAAAGTTGAGATTGGAATTGTTAGCAAGACCGAGAAG	+	40033994	40034033	40034034	40034494	40034049	40034050	Pper_target_1593_genes_0_24148544
chr1	TAGAACATCTTCTTTTCCTTTTTCTAGCCGTTAAAACACC	-	40040712	40040751	40040252	40040712	40040685	40040686	Pper_target_1594_genes_0_24148545
chr1	ATTGCTCTCTGATTCTTTCTTCCTGTCGACCATTTTCTTG	+	40119921	40119960	40119961	40120421	40119982	40119983	Pper_target_1595_genes_0_24148546
chr1	TTCGGTGTTTGTTATCGATACGTGAGCAAAAGATTTGAAG	+	40125790	40125829	40125830	40126290	40125847	40125848	Pper_target_1596_genes_0_24148547
chr1	ATACTTATTGAAGTTTACATCAAAAATTGGCATGGGATGT	+	40130785	40130824	40130825	40131285	40130838	40130839	Pper_target_1597_genes_0_24148548
chr1	TCAGGTTTTTGTAAAAGTCGGTCAATTCATTCCGGTTCAG	+	40135967	40136006	40136007	40136467	40136026	40136027	Pper_target_1598_genes_0_24148549
chr1	CCAAGAAGCAACAAGAATATCAAGCAACTAGTGACAATTC	+	40258708	40258747	40258748	40259208	40258768	40258769	Pper_target_1600_genes_0_24148551
chr1	AGAGTCAAACACCACATATTCCGTTTGAAATTTTTGGAAG	+	40262686	40262725	40262726	40263186	40262732	40262733	Pper_target_1601_genes_0_24148552
chr1	TTTCACACACCAAACTTCTCCATTCTCCGGGCATCATAAC	+	40266942	40266981	40266982	40267442	40266998	40266999	Pper_target_1602_genes_0_24148553
chr1	AACACAAACCTTTGAGAAAGATGAACTTCACGGATCAAAT	+	40271352	40271391	40271392	40271852	40271392	40271393	Pper_target_1603_genes_0_24148554
chr1	AAGAATAAATACTCACCATCAGCTGAACAAGACTGCATAG	+	40277975	40278014	40278015	40278475	40278038	40278039	Pper_target_1605_genes_0_24148556
chr1	TCTTGTAATTTACATTCTCTACAGATTAAAGCAAGCACTG	+	40290768	40290807	40290808	40291268	40290812	40290813	Pper_target_1608_genes_0_24148559
chr1	AAAACTTTTGGAGATATTGGTATTATTAAAATATTTATGC	+	40425066	40425105	40425106	40425566	40425107	40425108	Pper_target_1609_genes_0_24148560
chr1	TTACCGGTTTTGCCCCTTCTTTGTTTCACTTATAATTACC	-	40428264	40428303	40427804	40428264	40428252	40428253	Pper_target_1610_genes_0_24148561
chr1	TCCCGATACTTGTAACTTACAATTATCAAATTGACATCGC	+	40431327	40431366	40431367	40431827	40431368	40431369	Pper_target_1611_genes_0_24148562
chr1	AATTCCATATCAAGACCGGGACCAATCGATGATTCAATAC	+	40434947	40434986	40434987	40435447	40435010	40435011	Pper_target_1612_genes_0_24148563
chr1	CTGTTTTTAGTCAACGTCCGAATTAAAACCCGAGAACTCC	+	40461740	40461779	40461780	40462240	40461796	40461797	Pper_target_1614_genes_0_24148565
chr1	ATAGTTTAGATATTCTTTTATATGCTTGTAGTCTAAAAAT	+	40465036	40465075	40465076	40465536	40465100	40465101	Pper_target_1615_genes_0_24148566
chr1	CCCATTCCATAGTTCACATACATACAATTTCCAACTATTC	+	40587290	40587329	40587330	40587790	40587331	40587332	Pper_target_1617_genes_0_24148568
chr1	AGATTTAAGATATATCTAATTGTTATAACAGTATATATGC	+	40593536	40593575	40593576	40594036	40593579	40593580	Pper_target_1618_genes_0_24148569
chr1	GAGTTGATATATAAGTTTAGGTTTTACATTAAGCCTAGTC	+	40647705	40647744	40647745	40648205	40647764	40647765	Pper_target_1619_genes_0_24148570
chr1	ACTCTGCTTTTCAAATGCAGTATCATCCTGGAGAAGCAGA	+	40652140	40652179	40652180	40652640	40652182	40652183	Pper_target_1620_genes_0_24148571
chr1	CAAAATCGAGAAATGCTGAACTCAAGGACCAAAATGATAG	+	40663277	40663316	40663317	40663777	40663321	40663322	Pper_target_1622_genes_0_24148573
chr1	TGATGATGATGAAACTACTGGTGGCGGTGGAACCCTACAG	+	40666366	40666405	40666406	40666866	40666421	40666422	Pper_target_1623_genes_0_24148574
chr1	TGCCACAAAGATCACGAATACATTTAAAAACAATAAAATC	+	40718154	40718193	40718194	40718654	40718213	40718214	Pper_target_1626_genes_0_24148577
chr1	TTCACATTCATTCCTCTCCTGAAAATGGGAATGGGATATG	+	40724203	40724242	40724243	40724703	40724251	40724252	Pper_target_1627_genes_0_24148578
chr1	CACCACCTCCACCCAAATCTCTAACGATGTTATTTAGTTC	-	40727281	40727320	40726821	40727281	40727254	40727255	Pper_target_1628_genes_0_24148579
chr1	AGCTCTTTAGGACATCACTGTAGAGGTAAGATGTAGTTTC	+	40730513	40730552	40730553	40731013	40730574	40730575	Pper_target_1629_genes_0_24148580
chr1	CACATCGATCCCATCATGTGGAGACACAACAAACCAAATC	+	40733604	40733643	40733644	40734104	40733644	40733645	Pper_target_1630_genes_0_24148581
chr1	TTTAAGATTACCTTTACAACATTAATCTTACCAATTCAGC	+	40736823	40736862	40736863	40737323	40736866	40736867	Pper_target_1631_genes_0_24148582
chr1	GATTCTTCTTTTGAGAAAAAATAAGTTTACTGGTTCTTTG	+	40739902	40739941	40739942	40740402	40739943	40739944	Pper_target_1632_genes_0_24148583
chr1	ATTTGAGTGACCAGTCAACTAAAATTGAAATAACCAAAAA	+	40765824	40765863	40765864	40766324	40765885	40765886	Pper_target_1633_genes_0_24148584
chr1	TATAAATTTGAGTCCAATAAATTTGAAAGGTGATTGATAG	+	40768841	40768880	40768881	40769341	40768889	40768890	Pper_target_1634_genes_0_24148585
chr1	TGGATTTAACACACTAAAGGTGCGTAACAGAGGTGGAATG	+	40787108	40787147	40787148	40787608	40787161	40787162	Pper_target_1636_genes_0_24148587
chr1	AGCCAAAAAGTTTCATGCTAGTTGGGTTGTTTTGGACAAG	-	40790232	40790271	40789772	40790232	40790211	40790212	Pper_target_1637_genes_0_24148588
chr1	TTTGAAGTAGTTTGGTTGCAGATTTGGTCCCTCGGTAATG	+	40794004	40794043	40794044	40794504	40794063	40794064	Pper_target_1638_genes_0_24148589
chr1	CAGACGATTGACATGATGGCTATGAATGTTATTCATCCAG	+	40930284	40930323	40930324	40930784	40930343	40930344	Pper_target_1639_genes_0_24148590
chr1	ATCAGCAACTCTCTTTAATGTAATTTTTCAACTTGTTAAT	+	40933343	40933382	40933383	40933843	40933398	40933399	Pper_target_1640_genes_0_24148591
chr1	TCTTTTTTCATTTAATATATTTACAACCTGTGATTCTAGG	+	40956658	40956697	40956698	40957158	40956711	40956712	Pper_target_1641_genes_0_24148592
chr1	TTTTTTCTTAATATCAATGTTCTTATCTTCTTGTTTTCAC	+	40961014	40961053	40961054	40961514	40961054	40961055	Pper_target_1642_genes_0_24148593
chr1	GTTTTCTTTTATTCCATTTTCTTGAATTGTTACTTTCATC	+	40964105	40964144	40964145	40964605	40964167	40964168	Pper_target_1643_genes_0_24148594
chr1	AACTCAAAACATGGTTCAAGGTTCCAAACCTCTTTTCTTC	+	40967884	40967923	40967924	40968384	40967937	40967938	Pper_target_1644_genes_0_24148595
chr1	GCAGCGACGAGAGGTCTTATGGTGCATAAATTATCCGATG	+	40973213	40973252	40973253	40973713	40973271	40973272	Pper_target_1645_genes_0_24148596
chr1	TAAATTGACTATATTACCCTTAATGATATTTGTTTTTATC	+	41016616	41016655	41016656	41017116	41016674	41016675	Pper_target_1647_genes_0_24148598
chr1	TTGTTGTAATTGATCATAAACTTTCAAAAATCCATATTCT	+	41041843	41041882	41041883	41042343	41041902	41041903	Pper_target_1648_genes_0_24148599
chr1	CATTGCTTCTTCCAGATTGAGGATACCTGAGCAATAAATC	+	41045027	41045066	41045067	41045527	41045070	41045071	Pper_target_1649_genes_0_24148600
chr1	TAAAACGGTTTATGCCATTTAACCCATTTTCCTTTTTAAC	+	41048154	41048193	41048194	41048654	41048198	41048199	Pper_target_1650_genes_0_24148601
chr1	AGCGGCTTAGAATACATCTCAAATTCCCCACCGGAATTGG	+	41124363	41124402	41124403	41124863	41124418	41124419	Pper_target_1652_genes_0_24148603
chr1	CGGTGTAAAATATATATTAGGTGTTACACACATTAACTAT	+	41128362	41128401	41128402	41128862	41128451	41128452	Pper_target_1653_genes_0_24148604
chr1	AAACCTCAAATCTCATTTGGGGTTTCTGAGATCTCGCAAG	+	41133057	41133096	41133097	41133557	41133112	41133113	Pper_target_1654_genes_0_24148605
chr1	ATCCATTGCACCCATGAAGCTGAATCTTGATCTTGAAATG	+	41136517	41136556	41136557	41137017	41136559	41136560	Pper_target_1655_genes_0_24148606
chr1	TGGCTGAGGACCAAAAGATACCACTGCTACCAGCCTTGAG	+	41161772	41161811	41161812	41162272	41161823	41161824	Pper_target_1656_genes_0_24148607
chr1	ATAATAATAAACTTACTTGGCATGATTATGAATTATTTGG	+	41166813	41166852	41166853	41167313	41166876	41166877	Pper_target_1657_genes_0_24148608
chr1	TGGGGCTCTCTGCTACTTCCAGAACTCTCCGTGTGGATGA	+	41169834	41169873	41169874	41170334	41169894	41169895	Pper_target_1658_genes_0_24148609
chr1	CTTCCAGCAACCGGGAAATTCATCGGAAACTGATATGGAG	+	41175315	41175354	41175355	41175815	41175361	41175362	Pper_target_1659_genes_0_24148610
chr1	CGTTACAGAAATAATCATTAAAATGGAACTCGGTAATAAG	+	41269049	41269088	41269089	41269549	41269097	41269098	Pper_target_1660_genes_0_24148611
chr1	TGGCACCATTTTGGGTAGAGGCGGTAAAAATTTAAATGAA	+	41272534	41272573	41272574	41273034	41272581	41272582	Pper_target_1661_genes_0_24148612
chr1	TTATCTCGTTTCGTAAAAGGGTTTTCTGCAATCGACATTC	+	41275541	41275580	41275581	41276041	41275598	41275599	Pper_target_1662_genes_0_24148613
chr1	ACCGTTCTTAACGATCCAACAAATTACATAAAATTACAAG	+	41286768	41286807	41286808	41287268	41286818	41286819	Pper_target_1663_genes_0_24148614
chr1	AGGGTTTATTTCTCTAGTTCCCCTCCCCATTTTCAAATTC	+	41290263	41290302	41290303	41290763	41290320	41290321	Pper_target_1664_genes_0_24148615
chr1	AAACGGAGCTCGTATGCAAAAAGTTACGGATTTTAGAAGA	-	41322866	41322905	41322406	41322866	41322840	41322841	Pper_target_1665_genes_0_24148616
chr1	TTGTTCCTCATAAAAACTAAAAAACCTAAATGGAAGTTAC	+	41326680	41326719	41326720	41327180	41326739	41326740	Pper_target_1666_genes_0_24148617
chr1	CGGTTGAGATTTTGCCATTATTTCCTGATTTCGAACGGTA	+	41330348	41330387	41330388	41330848	41330389	41330390	Pper_target_1667_genes_0_24148618
chr1	TCATGTAGTCGGTGTCCCTGATAATTAAAATATGATAGTG	-	41335315	41335354	41334855	41335315	41335301	41335303	Pper_target_1668_genes_0_24148619
chr1	ATATAGCACATGTTCATTTACTATGTATTTTAATTTCTAA	+	41339558	41339597	41339598	41340058	41339604	41339605	Pper_target_1669_genes_0_24148620
chr1	TGGCTAGCATAATTGTTTTAGCAATCTTGTATCTATTTGG	+	41342837	41342876	41342877	41343337	41342901	41342902	Pper_target_1670_genes_0_24148621
chr1	GATGGTCTGGAGAAGCCAGAAACTTTGACCTTTTGGAACG	+	41345883	41345922	41345923	41346383	41345947	41345948	Pper_target_1671_genes_0_24148622
chr1	TCCATTCCCGTTTCCATTCCAACAAAACCTTTTCCTGCTG	+	41348965	41349004	41349005	41349465	41349029	41349030	Pper_target_1672_genes_0_24148623
chr1	AAGCCTTTTGTCCACCGAATAAGTGTCCCTGAATCAATAG	+	41375992	41376031	41376032	41376492	41376032	41376033	Pper_target_1674_genes_0_24148625
chr1	TTACATTAAGATGTATGTAAATATATTGTGGTGGAATGTG	+	41379651	41379690	41379691	41380151	41379701	41379702	Pper_target_1675_genes_0_24148626
chr1	AGAGAGCCCAACAAAATCGAAACTAGTTAAGTTATAAAAG	+	41383585	41383624	41383625	41384085	41383632	41383633	Pper_target_1676_genes_0_24148627
chr1	CAAGTGTAGCACCTAAGGCGTTGTCCTCTGTTAGTTCTAC	+	41388206	41388245	41388246	41388706	41388261	41388262	Pper_target_1677_genes_0_24148628
chr1	GTTAGTCATTCCAGAATTAAGTATTTCAAAATATGTTTCC	+	41424531	41424570	41424571	41425031	41424579	41424580	Pper_target_1680_genes_0_24148631
chr1	TACGTGTTGAAAGGCAGCTGCATGATACAGATAGTTGCAC	+	41521392	41521431	41521432	41521892	41521443	41521444	Pper_target_1681_genes_0_24148632
chr1	ATGAGATACCGGATAACGATGTCACCGAATTCGAAATTTG	+	41573863	41573902	41573903	41574363	41573922	41573924	Pper_target_1682_genes_0_24148633
chr1	TGAATGATTTCTTTTACTTTTTAAATTACATGTTGTGTGG	+	41627974	41628013	41628014	41628474	41628064	41628065	Pper_target_1684_genes_0_24148635
chr1	AACGTCTCTATTTGTAAGGAAATGGCCATCAATGTAAATC	+	41633057	41633096	41633097	41633557	41633103	41633104	Pper_target_1685_genes_0_24148636
chr1	TATCTATTTTTATAAATCAGAATGAATAAAGTATAAAAGC	+	41723432	41723471	41723472	41723932	41723486	41723487	Pper_target_1687_genes_0_24148638
chr1	TGCTGGAATGATAACTATTGTTGTAGGCGAATTCCACGAG	+	41727111	41727150	41727151	41727611	41727166	41727167	Pper_target_1688_genes_0_24148639
chr1	ATGAGGAAATATTAATGTTAAAGATTTAAAAGGTTTTGCT	+	41773580	41773619	41773620	41774080	41773630	41773631	Pper_target_1689_genes_0_24148640
chr1	CACATCTAAGCCCAATCAAAACAACTTTCCCTTTCACATC	+	41782408	41782447	41782448	41782908	41782466	41782467	Pper_target_1690_genes_0_24148641
chr1	ATTGGCATTCCCCAATACGTTTGCGTTATGTATGGGACTC	+	41792858	41792897	41792898	41793358	41792900	41792901	Pper_target_1691_genes_0_24148642
chr1	CCTCTATTTTTCTAATTTCAAGCTACTTCAAAACACTCAC	+	41796314	41796353	41796354	41796814	41796358	41796359	Pper_target_1692_genes_0_24148643
chr1	TAGCAAACATGGTGTTCATCTTCAAAGGATCTCAATTCTG	+	41885457	41885496	41885497	41885957	41885504	41885505	Pper_target_1693_genes_0_24148644
chr1	AACTTATTGAGGTTTGACAACGGCAATAAGCATTTTAAGT	+	41906678	41906717	41906718	41907178	41906727	41906728	Pper_target_1694_genes_0_24148645
chr1	TCTTTGAAACGAAATGTGAGCCAAATACGGAAGATTACAC	+	41953996	41954035	41954036	41954496	41954040	41954041	Pper_target_1695_genes_0_24148646
chr1	TGGAAACATAAAGTGAAATTGGAATCAAATACCCGTATAG	+	41957215	41957254	41957255	41957715	41957278	41957279	Pper_target_1696_genes_0_24148647
chr1	GGTTGATGAATGTCGTGATGTCTCTACAAAAGAACAAATG	+	41963374	41963413	41963414	41963874	41963426	41963427	Pper_target_1697_genes_0_24148648
chr1	ACTTGTATCAAAACCTTATATTCTTGCAATATCCAATCTC	+	42002131	42002170	42002171	42002631	42002172	42002173	Pper_target_1698_genes_0_24148649
chr1	AATAATATGAATGATTCGCATTACAAAGAACAATTTCCTA	+	42005709	42005748	42005749	42006209	42005768	42005769	Pper_target_1699_genes_0_24148650
chr1	CAAATGACGTTTTGCTACCAAGAAAAAAGACTTTATATAG	+	42008852	42008891	42008892	42009352	42008909	42008910	Pper_target_1700_genes_0_24148651
chr1	AGTTATGTCCATTAACTAACATTTTTTACGCCAATTCTGC	+	42040154	42040193	42040194	42040654	42040199	42040200	Pper_target_1701_genes_0_24148652
chr1	GGGCGATTTCATAGTTAATAGTGCATTTGAGAAATGTGTG	+	42049376	42049415	42049416	42049876	42049427	42049428	Pper_target_1702_genes_0_24148653
chr1	CTTAAAAGGGCATTTATAGTGTGTAGATGAAGTTTGGACT	-	42069158	42069197	42068698	42069158	42069147	42069148	Pper_target_1703_genes_0_24148654
chr1	CACGTTAACTGTAGACACCTGTTGATGTTGCCTTATTATC	+	42072206	42072245	42072246	42072706	42072250	42072251	Pper_target_1704_genes_0_24148655
chr1	ACCAAAAGTGGCTTTATATCAACTACTCATCTTCATCTTC	+	42094740	42094779	42094780	42095240	42094784	42094785	Pper_target_1705_genes_0_24148656
chr1	CTTCTTCATTTTCGCAAGTTGGGCCCAAAAATCTGTGAGG	+	42099925	42099964	42099965	42100425	42099976	42099977	Pper_target_1706_genes_0_24148657
chr1	CCTATTTATCTCAGACCTCAGCTTTCCCTCCCTTTATTTC	+	42112080	42112119	42112120	42112580	42112139	42112140	Pper_target_1708_genes_0_24148659
chr1	AAAAAACTAAAAAGTTATATGTTTTAGGATTGCCGTTTTT	+	42115228	42115267	42115268	42115728	42115290	42115291	Pper_target_1709_genes_0_24148660
chr1	GCGTACAAATAATCATTAGTGCGGAATCATGAGGTGTAAC	-	42131340	42131379	42130880	42131340	42131316	42131317	Pper_target_1710_genes_0_24148661
chr1	TCGCCGCCGAATTCTTCCGCTATTTGCTTGGAGGTGAAGC	+	42135450	42135489	42135490	42135950	42135495	42135496	Pper_target_1711_genes_0_24148662
chr1	ACTTTTTTACCCCTAAAGCGAGCTCCAAAATTCTGACAAG	+	42138551	42138590	42138591	42139051	42138598	42138599	Pper_target_1712_genes_0_24148663
chr1	TCATGAAGTTAGAGCTTGAATTACCCTAAATCTACACTTG	+	42141585	42141624	42141625	42142085	42141639	42141640	Pper_target_1713_genes_0_24148664
chr1	GGAAGCGGGAGTAGAAGAGGATTGACCAATAACTAAGACC	+	42146113	42146152	42146153	42146613	42146153	42146154	Pper_target_1714_genes_0_24148665
chr1	TATTGTATAAGAGAAAATGAATCAACAAAACACAAGAAAT	+	42183647	42183686	42183687	42184147	42183711	42183712	Pper_target_1715_genes_0_24148666
chr1	GACCTCGAAACCAAAATCTTGTACACCAGCCTCTGGTAAG	+	42186914	42186953	42186954	42187414	42186955	42186956	Pper_target_1716_genes_0_24148667
chr1	TTTACCTTATCATCCTCTACTGCCATTTTTCTCTTTCTTT	+	42190179	42190218	42190219	42190679	42190228	42190229	Pper_target_1717_genes_0_24148668
chr1	CTATTCAACATATAGAAACGTTGAAAGTATAAGACACAAG	+	42263985	42264024	42264025	42264485	42264030	42264031	Pper_target_1718_genes_0_24148669
chr1	TAAAAAAATTAACTTGAAATTGTAAGATATTAATGAATCC	+	42267039	42267078	42267079	42267539	42267089	42267090	Pper_target_1719_genes_0_24148670
chr1	TTCCTCATGTGTAAATACCACATAACTCACAACCATTTTT	+	42361653	42361692	42361693	42362153	42361716	42361717	Pper_target_1722_genes_0_24148673
chr1	AGCTACTACAACCATTATGATCTTTTTCTATCTTGAATTG	+	42369281	42369320	42369321	42369781	42369330	42369331	Pper_target_1723_genes_0_24148674
chr1	GTAAGTACGACGATAATTTATTTCAAATGATATTGTCTTC	+	42395838	42395877	42395878	42396338	42395895	42395896	Pper_target_1725_genes_0_24148676
chr1	GTAGGGTCTTTAAAGTCAACAGATTGGTCGTAAGTCTCAG	+	42400036	42400075	42400076	42400536	42400077	42400078	Pper_target_1726_genes_0_24148677
chr1	CACAATGAAAGAAATGCACACACACACACACACAAAGGAC	+	42585396	42585435	42585436	42585896	42585453	42585454	Pper_target_1728_genes_0_24148679
chr1	GTCTTGAGTCATACAAATGTGGTCTTGATGGTTATTTTTG	+	42592971	42593010	42593011	42593471	42593026	42593027	Pper_target_1730_genes_0_24148681
chr1	GTTCATGTCGGTAGGAGGGTGGCGTATGGCATCCATAAAA	+	42660426	42660465	42660466	42660926	42660481	42660482	Pper_target_1731_genes_0_24148682
chr1	ATTCAAAACATGTAAAAAAGTATTGCAATGAATAATATAT	+	42666723	42666762	42666763	42667223	42666768	42666769	Pper_target_1732_genes_0_24148683
chr1	GAGAAAGAAAAAGAAAGGTGAGAACAACTTACCCTTTGAG	+	42762357	42762396	42762397	42762857	42762419	42762420	Pper_target_1733_genes_0_24148684
chr1	ACATGTGCATATAGACGGAATTTATATGTGGTTCACTAAT	+	43079787	43079826	43079827	43080287	43079836	43079837	Pper_target_1737_genes_0_24148688
chr1	TGATACATAGGAACATGAGGACCTTTTTCAACAATCTTGC	+	43249432	43249471	43249472	43249932	43249485	43249486	Pper_target_1739_genes_0_24148690
chr1	AAGGTATCTGACAAAACACAGCTCCGAATGATATCTTAAC	-	43405808	43405847	43405348	43405808	43405786	43405787	Pper_target_1740_genes_0_24148691
chr1	ATTCATCTGAAATGTCTAGCAGATGTTTGTTCGTTTTTAC	+	43410745	43410784	43410785	43411245	43410799	43410800	Pper_target_1741_genes_0_24148692
chr1	ATTACCATTTGGATGCAATTAGTGTTTTTGCTATTTTGAA	+	43441562	43441601	43441602	43442062	43441626	43441627	Pper_target_1743_genes_0_24148694
chr1	AGAAATCAAATATAGCATTAATGTTTACAGAAGAACGATG	+	43445565	43445604	43445605	43446065	43445613	43445614	Pper_target_1744_genes_0_24148695
chr1	ATTAATAATTTATTTAAAATAATTTATTTAAAAATAATTG	-	43449929	43449968	43449469	43449929	43449926	43449927	Pper_target_1745_genes_0_24148696
chr1	CCTTCCTTGCTCCTCCGCCATCTGTCACTGTCCGTTGCTC	+	43471380	43471419	43471420	43471880	43471430	43471431	Pper_target_1746_genes_0_24148697
chr1	AAACATTTCTAACACATTAAAAAAATTAGATCAATTACCT	+	43477762	43477801	43477802	43478262	43477851	43477852	Pper_target_1747_genes_0_24148698
chr1	AAGCATCCAGAATACAGATCTGGCCTCCTAGGGTCGATAC	+	43500515	43500554	43500555	43501015	43500564	43500565	Pper_target_1749_genes_0_24148700
chr1	TCCTGTATATATACACTCAAAACCCATTTCTACTGACCAC	+	43504655	43504694	43504695	43505155	43504708	43504709	Pper_target_1750_genes_0_24148701
chr1	AGTACACTGTGTTAGTTATATGGTTTAGAGGTACAAAAAG	+	43508073	43508112	43508113	43508573	43508125	43508126	Pper_target_1751_genes_0_24148702
chr1	TCAAAAGAATTGGAATTCTTTAAATTCCATTGAGTATATG	+	43526965	43527004	43527005	43527465	43527022	43527023	Pper_target_1752_genes_0_24148703
chr1	GGCGGATCTGAAGAATTGCCGTCGATGAGAGGAGGTGAAG	+	43530115	43530154	43530155	43530615	43530160	43530161	Pper_target_1753_genes_0_24148704
chr1	GGTAAAAAGTATCCGAATCAGAAGGAGATGAACAAGAGAC	+	43533340	43533379	43533380	43533840	43533403	43533404	Pper_target_1754_genes_0_24148705
chr1	ATGCGGTCTTCCCTCTTGATTGGGGACATCAGCTTCATAG	+	43547247	43547286	43547287	43547747	43547335	43547336	Pper_target_1756_genes_0_24148707
chr1	ATTTTAACATTGGTTAATTACTACTAAATGACATAAACTC	+	43579203	43579242	43579243	43579703	43579257	43579258	Pper_target_1757_genes_0_24148708
chr1	CCATTTTCTCTTTCAAAATCCCTCATTCTAAATGACCTTC	+	43582736	43582775	43582776	43583236	43582792	43582793	Pper_target_1758_genes_0_24148709
chr1	TTTAGGGTTAATTAGTTTCTTAACCCATTAAGACCTACCC	+	43634088	43634127	43634128	43634588	43634129	43634130	Pper_target_1759_genes_0_24148710
chr1	CCGCCACCTGCACCGCATCCGCCATCGTCACCGCCATGTT	+	43637484	43637523	43637524	43637984	43637536	43637537	Pper_target_1760_genes_0_24148711
chr1	TGCATTTTAGTTTCAAACAATCAAATTACATTTTAATTTT	+	43703251	43703290	43703291	43703751	43703310	43703311	Pper_target_1761_genes_0_24148712
chr1	CCCCATCAAATTACTTTGCTGTTGCTGTTGTTGAAGCAAT	+	43706893	43706932	43706933	43707393	43706940	43706941	Pper_target_1762_genes_0_24148713
chr1	TAAGTTAATTATTTGAGAACAAAAATACTTCACTTGATAC	+	43778522	43778561	43778562	43779022	43778563	43778564	Pper_target_1764_genes_0_24148715
chr1	AGAAAAGAAGGCTCCACTCAAGAATTAAGTTATATATATG	+	43781820	43781859	43781860	43782320	43781877	43781878	Pper_target_1765_genes_0_24148716
chr1	AAACTCAGCTGCTTCATTTCTTGCTTGTTGAACCAATGTC	+	43787719	43787758	43787759	43788219	43787782	43787783	Pper_target_1766_genes_0_24148717
chr1	TACTCTATTATTCCAGACTTGGGAATTGTTATAGTTACTG	+	43791522	43791561	43791562	43792022	43791572	43791573	Pper_target_1767_genes_0_24148718
chr1	TCAGAAACTATTGTATCAAGACCATAATTTCTGCCTCAGC	+	43798699	43798738	43798739	43799199	43798755	43798756	Pper_target_1768_genes_0_24148719
chr1	GTCACGTGAGAAAACCAAAAATCTTAAAATATCTCCATTG	+	43802056	43802095	43802096	43802556	43802097	43802098	Pper_target_1769_genes_0_24148720
chr1	TCTTATTGGCTTCTAGGATCTGCTTCCATTCAATGATTTC	+	43843484	43843523	43843524	43843984	43843543	43843544	Pper_target_1770_genes_0_24148721
chr1	GGGGGAAATGGTGTTCATGGTGTTATGAGGAGGTTAATAG	+	43870671	43870710	43870711	43871171	43870726	43870727	Pper_target_1772_genes_0_24148723
chr1	CCATCTCAGAACTCTATGCGGTAAAAAAATTAAAATATAT	+	43873805	43873844	43873845	43874305	43873864	43873865	Pper_target_1773_genes_0_24148724
chr1	TAATGATACCTTAGATTACTTCGCTACACTAGAAGATTCG	+	43944195	43944234	43944235	43944695	43944244	43944245	Pper_target_1774_genes_0_24148725
chr1	AACAGCATGAAAGCCTTGTAATACTCTCATTATAGTGTAC	+	43979270	43979309	43979310	43979770	43979323	43979324	Pper_target_1775_genes_0_24148726
chr1	AATTTAGAACAAGAAATAATAGATTTTTCAACTAAGAACC	+	43990838	43990877	43990878	43991338	43990885	43990886	Pper_target_1776_genes_0_24148727
chr1	ACTGTTATATGTGGTCTATAGGAATTGATAAACATTATGG	-	44002636	44002675	44002176	44002636	44002633	44002634	Pper_target_1777_genes_0_24148728
chr1	GACCGGAAAAGAACATCGCGAACCCTCTTGGTGAGCTTTG	+	44032112	44032151	44032152	44032612	44032170	44032171	Pper_target_1779_genes_0_24148730
chr1	TCGCTGAACACCGTTAATTAATTTCCAAACACACACACAC	+	44058233	44058272	44058273	44058733	44058291	44058292	Pper_target_1780_genes_0_24148731
chr1	TTTAAGAGATTTAATCATAGAAAAATATCCAATTAAGCTC	+	44079707	44079746	44079747	44080207	44079767	44079768	Pper_target_1781_genes_0_24148732
chr1	GGGCCTACCATACTATAATGGCTAAAAGGTATACACCAAC	+	44082836	44082875	44082876	44083336	44082878	44082879	Pper_target_1782_genes_0_24148733
chr1	GGACCCCTAGCCTTTAATTTTCGGCTACCATTTGATTCTA	+	44087748	44087787	44087788	44088248	44087795	44087796	Pper_target_1783_genes_0_24148734
chr1	TTAGCAAAGTAACTGTAAACACTAATTTATATAAGTGGAG	+	44206909	44206948	44206949	44207409	44206968	44206969	Pper_target_1784_genes_0_24148735
chr1	CACTCGACTCAGTCTCAAAGATCTAATTTGCCCGAGGAAG	+	44293735	44293774	44293775	44294235	44293792	44293793	Pper_target_1785_genes_0_24148736
chr1	AAAACACATACTCTTTAGGATTCTCGCACACTTCAAATTC	+	44301041	44301080	44301081	44301541	44301098	44301099	Pper_target_1787_genes_0_24148738
chr1	CCTTTATTTATAGAGGCCTTATGGTTACTTAGAAAGATCC	+	44338384	44338423	44338424	44338884	44338438	44338439	Pper_target_1788_genes_0_24148739
chr1	AATGGATTACATATATGGCCTCTTCAATTCTCCTAAGTTC	+	44361210	44361249	44361250	44361710	44361267	44361268	Pper_target_1790_genes_0_24148741
chr1	AGAGAGAGATAGACACACTAGTCCATGTCTTCTTCCGTAG	-	44393532	44393571	44393072	44393532	44393508	44393509	Pper_target_1791_genes_0_24148742
chr1	TAATAGGTAAAAATGTATATTTATTTTATCTAAAACCTAC	+	44398594	44398633	44398634	44399094	44398649	44398650	Pper_target_1792_genes_0_24148743
chr1	TCCGCCGATGTCACAACTTCTCCACTATCATCCACCAACA	+	44503223	44503262	44503263	44503723	44503287	44503288	Pper_target_1793_genes_0_24148744
chr1	TTTAGGTGTTGATGATGGTTGCTATATAGACTGGAGTCAC	+	44508524	44508563	44508564	44509024	44508573	44508574	Pper_target_1794_genes_0_24148745
chr1	ATCCCTAGATTGCTATCACCCGGGCACGCTTAACTGAAGA	+	44791749	44791788	44791789	44792249	44791807	44791808	Pper_target_1796_genes_0_24148747
chr1	ATGCGGTTCACGGTTTCCATGACTTCGTGTCCAAAACCTG	+	44797000	44797039	44797040	44797500	44797046	44797047	Pper_target_1797_genes_0_24148748
chr1	TAATGCAATTGCCCAGTGACTCTGATGAACAAATGGTAAC	+	44806525	44806564	44806565	44807025	44806585	44806586	Pper_target_1798_genes_0_24148749
chr1	TTGCTCATTTTAGAAAATCATTTCTTTTGAGCAATTTTCC	+	44819579	44819618	44819619	44820079	44819640	44819641	Pper_target_1799_genes_0_24148750
chr1	CTCTTCCATCACCGATGAACATTAAGTTGGGTTTGTTTTT	+	44829749	44829788	44829789	44830249	44829812	44829813	Pper_target_1800_genes_0_24148751
chr1	AAGAAGAACCACACCACCAAAGCCATTATCTTTCAAACTC	+	44834282	44834321	44834322	44834782	44834323	44834324	Pper_target_1801_genes_0_24148752
chr1	AAAAAACACTACATACTAGAAAGGAACGCAGAAAAAACAA	+	44863714	44863753	44863754	44864214	44863757	44863758	Pper_target_1802_genes_0_24148753
chr1	TATTAAGGTCACATAAGTAAGTATGTTTTAATATTCATGT	+	44929344	44929383	44929384	44929844	44929389	44929390	Pper_target_1803_genes_0_24148754
chr1	GCTTTATTAATTAGGCCGACATTTGTTTTTTGCTCTTTTC	+	44932407	44932446	44932447	44932907	44932460	44932461	Pper_target_1804_genes_0_24148755
chr1	GGATATTGAAGATCGTATTGTCTTTCCAGTTATCTTTTAC	+	45006757	45006796	45006797	45007257	45006801	45006802	Pper_target_1805_genes_0_24148756
chr1	AAACTAGAGCTGTTGGTAAAATATATTGAATAGGAAATAG	+	45009954	45009993	45009994	45010454	45009995	45009996	Pper_target_1806_genes_0_24148757
chr1	TTCATATCTGAATAAATATGACCACAAAAAGTATATTACC	+	45088409	45088448	45088449	45088909	45088457	45088458	Pper_target_1807_genes_0_24148758
chr1	CGGATATTTATCATCATCATCCTCCACTAGATCTCTTCCA	+	45091460	45091499	45091500	45091960	45091524	45091525	Pper_target_1808_genes_0_24148759
chr1	ATACATGCCAAAGAGAGCATTCTGTAAACATGTTTATAAG	+	45095044	45095083	45095084	45095544	45095103	45095104	Pper_target_1809_genes_0_24148760
chr1	AAATTCTAGTACATACATGACAAACTATCATCTTCGATTC	+	45100708	45100747	45100748	45101208	45100758	45100759	Pper_target_1810_genes_0_24148761
chr1	ATGATCATAAACAGAATGCTATGGGTCCAATCAACCAACG	+	45127812	45127851	45127852	45128312	45127868	45127869	Pper_target_1812_genes_0_24148763
chr1	AACTGGTCATACCCGACTTTGGATCGATTCAGGGATGGTC	+	45132185	45132224	45132225	45132685	45132248	45132249	Pper_target_1813_genes_0_24148764
chr1	ATGCTTTAACTTCCACTTCCAAATGTCGGTTGTTTCCTAC	+	45135402	45135441	45135442	45135902	45135459	45135460	Pper_target_1814_genes_0_24148765
chr1	CAATTTTTATGTACAAATTTAGGTAAAAAGGATTAGAACT	+	45139487	45139526	45139527	45139987	45139529	45139530	Pper_target_1815_genes_0_24148766
chr1	CTCCACCAACATCAATCATATGCCTCCCTATCAAAAACTC	+	45142953	45142992	45142993	45143453	45142999	45143000	Pper_target_1816_genes_0_24148767
chr1	GATGTTATTCCGGTGGAGGTAGTGGAGACCGGAGAGAATC	+	45172180	45172219	45172220	45172680	45172235	45172236	Pper_target_1817_genes_0_24148768
chr1	AATCATAAAGATTAGCATGACTCTTAAGCTGGAAGAAAAG	+	45176385	45176424	45176425	45176885	45176448	45176449	Pper_target_1818_genes_0_24148769
chr1	CCTAACCCAGCCCAATCCAAGGCCCAAATGATTATCTTAC	+	45214959	45214998	45214999	45215459	45215003	45215004	Pper_target_1821_genes_0_24148772
chr1	AAGAGAAGATAGTAGATTCATCTTGGAAGCGCAAGACAAC	+	45218317	45218356	45218357	45218817	45218377	45218378	Pper_target_1822_genes_0_24148773
chr1	ATAAAAGATAACATTTGATATACAAGTTGCGAAATTATTG	+	45232873	45232912	45232913	45233373	45232935	45232936	Pper_target_1823_genes_0_24148774
chr1	GTCTCGATCTTCTCAAAAGCTTCGCCAACGTTGATTGCTC	+	45236143	45236182	45236183	45236643	45236194	45236195	Pper_target_1824_genes_0_24148775
chr1	CCCTAAACTAATATTTACATTACGGCTTTGCTCCTCTAAG	+	45239535	45239574	45239575	45240035	45239587	45239588	Pper_target_1825_genes_0_24148776
chr1	GAGAAAAACTCACCTCACAGTCTGAAAGAGAGCATAAAAG	+	45242941	45242980	45242981	45243441	45242982	45242983	Pper_target_1826_genes_0_24148777
chr1	ATTAATTATATATATTCTTACTCAAAAACATTCCGTGCTC	+	45260869	45260908	45260909	45261369	45260923	45260924	Pper_target_1827_genes_0_24148778
chr1	TCCTCTCTTCCTTCCGTTGCCGTTTTGTTTATAGTCATAC	+	45340004	45340043	45340044	45340504	45340044	45340045	Pper_target_1828_genes_0_24148779
chr1	GACCTGAACCTACAACGGTCGTTCATAATGGTATGTTTTA	+	45343789	45343828	45343829	45344289	45343839	45343840	Pper_target_1829_genes_0_24148780
chr1	TATTTATCATTAAACTTGTATTGTATGTTTTCATTTAACG	+	45362931	45362970	45362971	45363431	45362979	45362980	Pper_target_1831_genes_0_24148782
chr1	CACCAACAAACACTATGTAAGACTCAAAACTCACAAAAAC	+	45377396	45377435	45377436	45377896	45377448	45377449	Pper_target_1833_genes_0_24148784
chr1	GACTTTTTCCTCAGTTGTCCACATTAGAATAGGTTGCTTG	+	45380458	45380497	45380498	45380958	45380520	45380521	Pper_target_1834_genes_0_24148785
chr1	AACATTATATGACTAATAATATGATCCTTACATAACAATG	+	45400895	45400934	45400935	45401395	45400955	45400956	Pper_target_1835_genes_0_24148786
chr1	GGGTCCAGAAGAGCCCAAGAAAGATAACGACGATGACTTG	+	45405112	45405151	45405152	45405612	45405166	45405167	Pper_target_1836_genes_0_24148787
chr1	CCAGGTAAGCAACACACTGTGCCAGGTTGACACGACACTC	+	45467240	45467279	45467280	45467740	45467288	45467289	Pper_target_1837_genes_0_24148788
chr1	GACATCTCAGCGATAAGTCTTTGTACGCCATTGATTTCTG	+	45487398	45487437	45487438	45487898	45487451	45487452	Pper_target_1840_genes_0_24148791
chr1	CTAAACCGGGTAAATAACAATAATTGATTGTGATATAGCG	+	45534509	45534548	45534549	45535009	45534562	45534563	Pper_target_1841_genes_0_24148792
chr1	CATACTTCATATTAGAGAAGAATGGTATTTGCTGTGAATC	+	45539038	45539077	45539078	45539538	45539100	45539101	Pper_target_1842_genes_0_24148793
chr1	AAAAAAATTGAACAAAATAAATATGTTACGCGAAAGACTC	+	45543770	45543809	45543810	45544270	45543828	45543829	Pper_target_1843_genes_0_24148794
chr1	TTGTTGTGTCCTGAAACCATGTAAAAACTAGAAAAATAAC	+	45546879	45546918	45546919	45547379	45546925	45546926	Pper_target_1844_genes_0_24148795
chr1	TGATTCAATACAAAGACTCAATTATGGTTTCAATATTTTT	+	45552151	45552190	45552191	45552651	45552210	45552211	Pper_target_1845_genes_0_24148796
chr1	CTTCTAGTTCTCCCTTAAAACAACCTCATCTTTATAATTC	+	45556872	45556911	45556912	45557372	45556934	45556935	Pper_target_1846_genes_0_24148797
chr1	AAAACGTAGATTTCTACGATTTTGAAGAACATAATTTCAC	+	45560091	45560130	45560131	45560591	45560137	45560138	Pper_target_1847_genes_0_24148798
chr1	ATGGCAACAACATCGGCTCCAGAGAGAATTAGAGGCATTG	+	45563945	45563984	45563985	45564445	45563988	45563989	Pper_target_1848_genes_0_24148799
chr1	TTCAAAATATACGGGAGTTGTTTGCATTTAGAAGTTCTTG	+	45567155	45567194	45567195	45567655	45567202	45567203	Pper_target_1849_genes_0_24148800
chr1	AAACATCTTCAAAGTTCTACATAAAAATTAAACATAACAC	+	45648400	45648439	45648440	45648900	45648460	45648461	Pper_target_1850_genes_0_24148801
chr1	CACGTACTGAAAGAACTGTCCATGCTCCTTCTTTTCTACC	-	45670238	45670277	45669778	45670238	45670227	45670228	Pper_target_1851_genes_0_24148802
chr1	TGGGCTCCATCTCTGACGAAAACATGGTGACGAATAACAG	+	45674585	45674624	45674625	45675085	45674625	45674626	Pper_target_1852_genes_0_24148803
chr1	GTTGTCACAAAGTCCAAGTGATATTGAAGGTTATATCAAG	+	45677613	45677652	45677653	45678113	45677673	45677674	Pper_target_1853_genes_0_24148804
chr1	ATGTCATCTGTAATGGAGTACATGAGGAAGCTTTCATTTC	+	45682553	45682592	45682593	45683053	45682614	45682615	Pper_target_1854_genes_0_24148805
chr1	CACTCTATTCGTGGCCGATGCCAAGTGTACTTGTTTTGAG	+	45700341	45700380	45700381	45700841	45700388	45700389	Pper_target_1855_genes_0_24148806
chr1	GTGAGAAGATCAGCACATGCAGCTGCTTTAATTCAAGATG	+	45703715	45703754	45703755	45704215	45703770	45703771	Pper_target_1856_genes_0_24148807
chr1	GGTTTACATATAACACCCACAACTCCAAAGATTTAGAAAC	+	45713578	45713617	45713618	45714078	45713622	45713623	Pper_target_1858_genes_0_24148809
chr1	GCTGCCTATTAACATCTAGTAATTAAGCCACAAAGTCTGG	+	45721559	45721598	45721599	45722059	45721599	45721600	Pper_target_1859_genes_0_24148810
chr1	GAGGTGGTCGTCGCTACTACACTTTGTTTTCTTTGGAGAT	+	45724948	45724987	45724988	45725448	45725007	45725008	Pper_target_1860_genes_0_24148811
chr1	TTATGACTTCATAATTTCCAACAACTGTCATTTCTTATTT	+	45761603	45761642	45761643	45762103	45761644	45761645	Pper_target_1861_genes_0_24148812
chr1	AATCCCTACCTCCCGTGTCATCAAAAACATTCAAAATATC	+	45836271	45836310	45836311	45836771	45836329	45836330	Pper_target_1862_genes_0_24148813
chr1	ATTAATCATGCTGACTAAAGAATGTTATTTTGTGGATGCT	+	45840564	45840603	45840604	45841064	45840612	45840613	Pper_target_1863_genes_0_24148814
chr1	AATATAATAAGATATATATTGAAGCCTGCCTCTTATAGGG	+	45844656	45844695	45844696	45845156	45844697	45844698	Pper_target_1864_genes_0_24148815
chr1	CACATGGAACATTGGACTATTTTGTATTCGTAGTCCACTC	+	45888411	45888450	45888451	45888911	45888473	45888474	Pper_target_1866_genes_0_24148817
chr1	CGAGGTTCCTAATTAGAACTTTCCTTTATCAGCGATTACC	+	45971970	45972009	45972010	45972470	45972015	45972016	Pper_target_1868_genes_0_24148819
chr1	GGTCTATCTTTCTCTTCTTTACTTCTTCCTCTTTCTTTTG	+	45976958	45976997	45976998	45977458	45977006	45977007	Pper_target_1869_genes_0_24148820
chr1	CCATTTTAGATAGTCTGTGTGGAATGGTATATTTTTCTTG	+	45984864	45984903	45984904	45985364	45984909	45984910	Pper_target_1870_genes_0_24148821
chr1	ATGTTTTATGGGAAGACCTGGCAACCATGGAACTAACAAC	+	45992444	45992483	45992484	45992944	45992498	45992499	Pper_target_1871_genes_0_24148822
chr1	AACTTTATGCCTTCGAACGTCTTAATGGACTCAAACCTAA	+	46026796	46026835	46026836	46027296	46026860	46026861	Pper_target_1872_genes_0_24148823
chr1	AATCGCGATTCCGATGTCTCAAGACCATAGACCATCTTGT	+	46032064	46032103	46032104	46032564	46032113	46032114	Pper_target_1873_genes_0_24148824
chr1	GGAATTCTTCGCCCTAATTGGCTTGACGGTGCCACCTACG	+	46088241	46088280	46088281	46088741	46088296	46088297	Pper_target_1876_genes_0_24148827
chr1	GCGGACCTTACCCTACTCTCCTAAACACAACCGCCATCTC	+	46828498	46828537	46828538	46828998	46828560	46828561	Pper_target_1882_genes_0_24148833
chr1	ATAAGTTAATAAAATAAAAAGGATAAAGATATTAAAAATG	+	46878266	46878305	46878306	46878766	46878308	46878309	Pper_target_1883_genes_0_24148834
chr1	ATAGAAACCTATATACCACAGGCTAAAAATTAAATCAAAC	+	46881976	46882015	46882016	46882476	46882032	46882033	Pper_target_1884_genes_0_24148835
chr1	AAGCACAAATTCAAAGCCTGGACTCACTACTAGAAAACAG	-	46908136	46908175	46907676	46908136	46908109	46908110	Pper_target_1885_genes_0_24148836
chr1	GGTTATTGGTGAAAATCTATTAACTTTTGCTAAATTCTTG	+	47028077	47028116	47028117	47028577	47028122	47028123	Pper_target_1886_genes_0_24148837
chr1	TGCATTGATGCAATATAGTGATAGTTTTTCCTAATTTACC	+	47037801	47037840	47037841	47038301	47037841	47037842	Pper_target_1887_genes_0_24148838
chr1	CTTCGGTCGTAACGAAGCGGTCAAATAGATCGGAGGAAAT	+	47169123	47169162	47169163	47169623	47169181	47169182	Pper_target_1889_genes_0_24148840
chr1	TAGAGTTGGATCGGGACAGCGGGTGCATACGTTGGGCGTA	-	47233891	47233930	47233431	47233891	47233888	47233889	Pper_target_1890_genes_0_24148841
chr1	GGCGTGGGGAAGCTGATACACTTATAATCCCTATAATTTG	+	47323040	47323079	47323080	47323540	47323082	47323083	Pper_target_1891_genes_0_24148842
chr1	GTTCGTTTTCTTGTTAGTGTTTATTTGCCGTTGTTGTTAG	+	47326051	47326090	47326091	47326551	47326105	47326106	Pper_target_1892_genes_0_24148843
chr1	CTTGGAGCTACCTTCAGAGGCGAATGGGATTTGTGACACG	+	47498520	47498559	47498560	47499020	47498583	47498584	Pper_target_1893_genes_0_24148844
chr1	ATTAGTCAAACCTTGACTTTCGTGTTAGTTTCTTCATTTG	+	47592745	47592784	47592785	47593245	47592792	47592793	Pper_target_1894_genes_0_24148845
chr1	ACATATAAATCTTTTTTATAAGGTCATAATAACGACTTTT	+	47595750	47595789	47595790	47596250	47595799	47595800	Pper_target_1895_genes_0_24148846
chr1	GATGCTTTCACAAGTAACATGATCAACTGTATTCATGATC	+	47599456	47599495	47599496	47599956	47599515	47599516	Pper_target_1896_genes_0_24148847
chr1	AGGGTGATAACTATATACGGGGTGAAACACAAAAGTTTAC	+	47605619	47605658	47605659	47606119	47605666	47605667	Pper_target_1897_genes_0_24148848
chr1	TACACATAAACCCATGTTGACAAAATTGTTGGATTAGGTG	-	47609328	47609367	47608868	47609328	47609313	47609314	Pper_target_1898_genes_0_24148849
chr1	AAAGTGGTTATAAGTATAAAATGTCAACTTAATCCAATAG	+	47626638	47626677	47626678	47627138	47626695	47626696	Pper_target_1899_genes_0_24148850
chr1	AGGACACATTTTTGTCTAATCCGATTTCCTAGACAATGAC	+	47638110	47638149	47638150	47638610	47638150	47638151	Pper_target_1900_genes_0_24148851
chr1	TGGAGACAATGAGAAGGAGCTTGGGGTTGTTTGTCTGTAG	+	47641375	47641414	47641415	47641875	47641420	47641421	Pper_target_1901_genes_0_24148852
chr1	AGCAAGAAATAGATTGCATATGGGGACTCTTCACTAATGG	+	47644404	47644443	47644444	47644904	47644449	47644450	Pper_target_1902_genes_0_24148853
chr1	CAAAACTAGACTTTCAACTATGGGAAAATACCAATAATAA	+	47647719	47647758	47647759	47648219	47647761	47647762	Pper_target_1903_genes_0_24148854
chr1	CAAAAGTCAAAATATCTAGCTTTGCTTGACTTTGGAGGTC	+	47652563	47652602	47652603	47653063	47652616	47652617	Pper_target_1904_genes_0_24148855
chr1	AACCAAAACAAGAAATCTTTTGAAGTTATATAAGCAACTG	+	47656390	47656429	47656430	47656890	47656443	47656444	Pper_target_1905_genes_0_24148856
chr1	AAGGTATACTATTGCTGTTTGTTGACTAAGATTCTAATGC	+	47662258	47662297	47662298	47662758	47662314	47662315	Pper_target_1906_genes_0_24148857
chr1	AACACCAACATCAGAGGAACACCCACATAGTATATTTCAC	+	47700495	47700534	47700535	47700995	47700538	47700539	Pper_target_1907_genes_0_24148858
chr1	TCTCAGAGCCACAAATACGATCACACTCGGAATACCAATC	+	47790929	47790968	47790969	47791429	47790989	47790990	Pper_target_1908_genes_0_24148859
chr1	AAAAAAATGCGTATTAGTAGCCTGGAAGCAGACCAAAACC	+	47808966	47809005	47809006	47809466	47809010	47809011	Pper_target_1909_genes_0_24148860
chr1	AATGAACAAATTATGTCGTAGTTGGCTACATGTAAGATTC	+	47812567	47812606	47812607	47813067	47812629	47812630	Pper_target_1910_genes_0_24148861
chr1	TCTGTGCAGTTTAGTCATTACAAAAATACAAAAAGTACAA	+	47838122	47838161	47838162	47838622	47838177	47838178	Pper_target_1911_genes_0_24148862
chr1	ATTCCGATTCCGGGACCTTGAATCCGGAGATTGAAGGGAG	+	47841455	47841494	47841495	47841955	47841514	47841515	Pper_target_1912_genes_0_24148863
chr1	TTTTTTAAAACTTATGGGCTGAAAATGGGCTTAAGGAAAG	+	47887485	47887524	47887525	47887985	47887546	47887547	Pper_target_1913_genes_0_24148864
chr1	TTGATGATGTGGCTTATGCAGTTCAAGTTTGAATCTTTTG	+	47890684	47890723	47890724	47891184	47890736	47890737	Pper_target_1914_genes_0_24148865
chr1	TCGTTCTTTTGGTGGCCTGACGTCGTGAACATCGAATGAG	+	47930113	47930152	47930153	47930613	47930157	47930158	Pper_target_1916_genes_0_24148867
chr1	CAAGGCTATATATACCTGAAATGGCACCTAGTCAGGCTTC	+	47944547	47944586	47944587	47945047	47944605	47944606	Pper_target_1917_genes_0_24148868
chr1	ACTCCACGTGATACTGAGAGATTATATTTGGCACATGAAG	+	47991450	47991489	47991490	47991950	47991496	47991497	Pper_target_1918_genes_0_24148869
chr1	AACCACTGTCGATACGCTCGTCTGATGTTTTGCTACTTTA	-	47994747	47994786	47994287	47994747	47994744	47994745	Pper_target_1919_genes_0_24148870
chr1	ATCCAAATTAATCGAAAGGTTTTGTCAGAGCTGTCTATGC	+	48018827	48018866	48018867	48019327	48018867	48018868	Pper_target_1920_genes_0_24148871
chr1	CACATGCATGACTAAATGGTAGTAATTTTGAACTTGTAAT	+	48027667	48027706	48027707	48028167	48027730	48027731	Pper_target_1921_genes_0_24148872
chr1	GTTGAGAAGCTTAAATTTGGAAACGAGCCTTTACAACAAG	+	48030692	48030731	48030732	48031192	48030740	48030741	Pper_target_1922_genes_0_24148873
chr1	ACAGTCTGAGTGTCCATACTCTATAAAATTGAGTTTGAAG	+	48038699	48038738	48038739	48039199	48038748	48038749	Pper_target_1923_genes_0_24148874
chr1	GATGAAGCATATTACTGAATATTTGTGTTGATTCCATATC	+	48041699	48041738	48041739	48042199	48041753	48041754	Pper_target_1924_genes_0_24148875
chr1	CACAACCACCGTCCTCGGCAGTCTATCTATCTTCTTTTTC	+	48044919	48044958	48044959	48045419	48044960	48044961	Pper_target_1925_genes_0_24148876
chr1	TTTTTCTTTTTATGTTATTTTGGATGAAAAACTTAAGTAA	+	48048905	48048944	48048945	48049405	48048964	48048965	Pper_target_1926_genes_0_24148877
chr1	CATTTTAAGTCCTTATTCCTTTAATTCCTCGAATCCATCT	+	48052025	48052064	48052065	48052525	48052074	48052075	Pper_target_1927_genes_0_24148878
chr1	ATGATAAAACTTAGGGTTCTCTGGGGCTTAGAGGGTGGAC	+	48055071	48055110	48055111	48055571	48055122	48055123	Pper_target_1928_genes_0_24148879
chr1	ATTCGCACACGTGTCGAGAACTGTCGCGAATGTGAAGTTG	+	48068110	48068149	48068150	48068610	48068151	48068152	Pper_target_1929_genes_0_24148880
chr1	TAGTCAGACATATTCAAAACAACAAAAGAAAATGTGTCTG	+	48078846	48078885	48078886	48079346	48078899	48078900	Pper_target_1930_genes_0_24148881
chr1	GAGTAATTTAACCACCTCTTGACCAATTCATAGACTGTAG	+	48103163	48103202	48103203	48103663	48103224	48103225	Pper_target_1931_genes_0_24148882
chr1	ATGGCAGAAAATGCATCATTTGACAAGACAATCGTTGAAG	+	48118533	48118572	48118573	48119033	48118589	48118590	Pper_target_1932_genes_0_24148883
chr1	TCAGTTTAGGGTTTGTTCATATATCATCTTCATACTTGAG	+	48123301	48123340	48123341	48123801	48123365	48123366	Pper_target_1933_genes_0_24148884
chr1	TCACGCGCCCTGTCCTTCAGAAGGCAGTGTCACAACTAGG	-	48201024	48201063	48200564	48201024	48201013	48201014	Pper_target_1934_genes_0_24148885
chr1	CGGCTCGATTGCATCGCATCCAAGGGAGATTTGTGAACAT	+	48269305	48269344	48269345	48269805	48269352	48269353	Pper_target_1935_genes_0_24148886
chr1	GCTCTCTTTTAGGGTTTATGTTTAGGTGTCTTATTACCTC	+	48315536	48315575	48315576	48316036	48315598	48315599	Pper_target_1937_genes_0_24148888
chr1	CATCAAGGTACAGGCCATCACCGCCAGTGGAGAGGAGGAG	+	48319647	48319686	48319687	48320147	48319707	48319708	Pper_target_1938_genes_0_24148889
chr1	TTTTGGAATTCAAAAAGCAGTCCCAAACACCCCCTTGTTC	+	48325938	48325977	48325978	48326438	48325980	48325981	Pper_target_1939_genes_0_24148890
chr1	TTGATGGTTGTGGAATGTGAACTACTTTTTATTAAATTAT	+	48329689	48329728	48329729	48330189	48329745	48329746	Pper_target_1940_genes_0_24148891
chr1	TTAATAAATAGTTCCTGTAAGAATTGTGGACCCATCAAAG	+	48335401	48335440	48335441	48335901	48335445	48335446	Pper_target_1941_genes_0_24148892
chr1	AATGCGGGATCGATTGTTAGGTATATATATATAAAGTTTC	+	48338985	48339024	48339025	48339485	48339044	48339045	Pper_target_1942_genes_0_24148893
chr1	ATATTTTGATTAAATGTCACAGAAAAACCACGCCCATGTC	+	48342067	48342106	48342107	48342567	48342116	48342117	Pper_target_1943_genes_0_24148894
chr1	AAAGTAGGGGTGAGCATGGTGCGATTTTTTGAGAAAACCG	+	48356370	48356409	48356410	48356870	48356429	48356430	Pper_target_1944_genes_0_24148895
chr1	GAATTTGAACTTATATTCCTTTCGCCATGTTGTACCTGAG	+	48359445	48359484	48359485	48359945	48359508	48359509	Pper_target_1945_genes_0_24148896
chr1	TGTTTACAAGTTTTTCGTGAGGTGTAAGTGATAAGATATG	+	48364104	48364143	48364144	48364604	48364152	48364153	Pper_target_1946_genes_0_24148897
chr1	AAGATTAGACCAAATAAAGATATATTACCAATTTACCAAG	+	48369330	48369369	48369370	48369830	48369378	48369379	Pper_target_1947_genes_0_24148898
chr1	ACTGTGAAACTCTAATTTAATTATGAAATGGAGTCAAACA	+	48380550	48380589	48380590	48381050	48380591	48380592	Pper_target_1948_genes_0_24148899
chr1	CCAGAACATGCTACTTTGTTACTGCAGTCAAAATTTATTG	+	48384074	48384113	48384114	48384574	48384129	48384130	Pper_target_1949_genes_0_24148900
chr1	TTTGTAGACTTTTTTCCCTTTTTTGATTGACATTGTGATC	-	48387178	48387217	48386718	48387178	48387173	48387174	Pper_target_1950_genes_0_24148901
chr1	TTACCACCCAAAACAAACCATCATAGATCATATATTTAAC	+	48424371	48424410	48424411	48424871	48424432	48424433	Pper_target_1952_genes_0_24148903
chr1	TTAGGTGATTATTTTCGGTATTTTTCTCTCGTCTGTATTC	+	48433755	48433794	48433795	48434255	48433816	48433817	Pper_target_1954_genes_0_24148905
chr1	GTTTTTAAACAGACAGATTATAACTTTACTTTCGGCTTTG	+	48436844	48436883	48436884	48437344	48436885	48436886	Pper_target_1955_genes_0_24148906
chr1	TTGTCAAAATTATGTATCCACATCACACTAAATGTCAAAC	+	48445609	48445648	48445649	48446109	48445660	48445661	Pper_target_1956_genes_0_24148907
chr1	TCTCCGATCTAAAACCAAAAGGTCCAACCACCGCTACATC	-	48448718	48448757	48448258	48448718	48448697	48448698	Pper_target_1957_genes_0_24148908
chr1	TGTTCTCTTTCCTATAGTCTCATTTTCTAAGGTTTGTTTC	+	48526836	48526875	48526876	48527336	48526878	48526879	Pper_target_1960_genes_0_24148911
chr1	CATGTTTACTCATCATCAGAAAACCATCATTGTAGATAGC	+	48529916	48529955	48529956	48530416	48529972	48529973	Pper_target_1961_genes_0_24148912
chr1	TTTATCACCTACGGAAGGCTAATGTGGTGGCCGAGCTCTT	+	48734214	48734253	48734254	48734714	48734256	48734258	Pper_target_1963_genes_0_24148914
chr1	GCAATGGCTTTTGTTAAAATGCATTGAGTTTGACCTCTTC	+	48740266	48740305	48740306	48740766	48740310	48740311	Pper_target_1965_genes_0_24148916
chr1	AAATTTGCAATTGCTAATTAGTGGTTTATTTTATCTTGTC	+	48810267	48810306	48810307	48810767	48810310	48810311	Pper_target_1966_genes_0_24148917
chr1	GGAAGCAAAGTGACACCAGTGTAAGTCCCATCCATGAAAA	+	48813504	48813543	48813544	48814004	48813558	48813560	Pper_target_1967_genes_0_24148918
chr1	CCAAGATAAAAGGGAAGCGGTGGAGTGGTAAGAGAATATG	+	48816573	48816612	48816613	48817073	48816630	48816631	Pper_target_1968_genes_0_24148919
chr1	CTCTTGTAAATTTTCACAGATAATGCTTATTGAATGCTAC	+	48819814	48819853	48819854	48820314	48819867	48819868	Pper_target_1969_genes_0_24148920
chr1	TAAACTAGAGTCTTCTTACTTAATTTGGATGCTTTGATAC	+	48823634	48823673	48823674	48824134	48823698	48823699	Pper_target_1970_genes_0_24148921
chr1	ATGATGAAAGGATTTGATGAAGTAATCAAGAGAACTTTGG	+	48938370	48938409	48938410	48938870	48938431	48938432	Pper_target_1971_genes_0_24148922
chr1	AAGGACGTTACTGGTCAATGGCGGTCAACGACTTGCAAAC	+	48941412	48941451	48941452	48941912	48941456	48941457	Pper_target_1972_genes_0_24148923
chr1	AATATTCTTAACGACAATGAGATGTGGTTCTCTGGGATAC	-	49084960	49084999	49084500	49084960	49084954	49084955	Pper_target_1973_genes_0_24148924
chr1	ATGGATTCATAAAAGACTAAAAGGTTGAATAAGAATAAAT	+	49087957	49087996	49087997	49088457	49088013	49088014	Pper_target_1974_genes_0_24148925
chr1	AAACACTATGGCTCAAAACCACAACAGCAATGTAAATAAC	+	49159893	49159932	49159933	49160393	49159937	49159938	Pper_target_1975_genes_0_24148926
chr1	ATTAATGCTATGTTTTTCGCGTCAAAACTAGCTGATAAAC	+	49163334	49163373	49163374	49163834	49163389	49163390	Pper_target_1976_genes_0_24148927
chr1	TCTAAATCAAATCATTCTTGTTTTCATTTGTTATCCTATT	-	49166417	49166456	49165957	49166417	49166394	49166395	Pper_target_1977_genes_0_24148928
chr1	TAACATAATAATAAAATTGTTTTTGATATTCATAATCAAC	+	49170275	49170314	49170315	49170775	49170326	49170327	Pper_target_1978_genes_0_24148929
chr1	CAATCAAAGCACAGAATATCGGTTGCTTACTTTTATGGAC	+	49173305	49173344	49173345	49173805	49173363	49173364	Pper_target_1979_genes_0_24148930
chr1	ACACAAAACAAACATCAGTTGATTTAGGAAGGGTTAAATG	+	49176885	49176924	49176925	49177385	49176941	49176942	Pper_target_1980_genes_0_24148931
chr1	TTAGAAAAAGGGATTTCTACAGTTTTCCAAAGTTTCCTAA	+	49180341	49180380	49180381	49180841	49180403	49180404	Pper_target_1981_genes_0_24148932
chr1	AACTTACTTGAAAGTATTTGAAGACATAAACAAATGAATC	+	49183389	49183428	49183429	49183889	49183437	49183438	Pper_target_1982_genes_0_24148933
chr1	TAGGGTTTTAGGTTGAATTGGTGAGAATTGGGAAAGAATG	+	49186384	49186423	49186424	49186884	49186447	49186448	Pper_target_1983_genes_0_24148934
chr1	AATTTCGCAATTTCATAGTATTGTATTGGGAAAATGACAC	-	49293685	49293724	49293225	49293685	49293677	49293678	Pper_target_1984_genes_0_24148935
chr1	ACTTCAAATCATCAAGAGATTAACTTCTCCTACAAGGAAC	-	49325738	49325777	49325278	49325738	49325727	49325728	Pper_target_1985_genes_0_24148936
chr1	TCTATTTTATAACAATATTTATAGTGGCTTATGCCTTGTG	+	49401625	49401664	49401665	49402125	49401666	49401667	Pper_target_1986_genes_0_24148937
chr1	CCTATAGATCACTTTGTAATATATTTGACAAAAGACTTTG	+	49424129	49424168	49424169	49424629	49424188	49424189	Pper_target_1987_genes_0_24148938
chr1	AATGAAAATACGTACCTATCTTGTTTGTTGGTGGAAACAG	+	49427657	49427696	49427697	49428157	49427697	49427698	Pper_target_1988_genes_0_24148939
chr1	ACACATTTTTGTGCCGCCCCGGTGGTTCTCAACACGATAG	+	49430851	49430890	49430891	49431351	49430900	49430902	Pper_target_1989_genes_0_24148940
chr1	TTTTTTTAATATATTTCCCCCATTTATGATACAGATTTTC	-	49433963	49434002	49433503	49433963	49433951	49433952	Pper_target_1990_genes_0_24148941
chr1	AAAAATAATATTATAAATGTATGTAAAAAGTTTTGGGTGT	+	49437205	49437244	49437245	49437705	49437247	49437248	Pper_target_1991_genes_0_24148942
chr1	TATATGAACATATGTTTATATATGAACATATGTGCAAATC	+	49441277	49441316	49441317	49441777	49441332	49441333	Pper_target_1992_genes_0_24148943
chr1	TCCCAACATAATCTCTCTTCTTGGATTTTGCAAGGAAGGT	+	49444959	49444998	49444999	49445459	49445007	49445008	Pper_target_1993_genes_0_24148944
chr1	ACTCGTTCGCTTATGCAAGTCATTGTGTTTTTTGTATTCC	+	49448148	49448187	49448188	49448648	49448207	49448208	Pper_target_1994_genes_0_24148945
chr1	TCAATTGTTATTATATTATCTACATGTAGCTTATTTATTA	+	49452597	49452636	49452637	49453097	49452656	49452657	Pper_target_1995_genes_0_24148946
chr1	ACTCACCAGTTGATGTGTTATTCTCTAATCCTTTCTTTAC	+	49455733	49455772	49455773	49456233	49455776	49455777	Pper_target_1996_genes_0_24148947
chr1	TTACCTCAGAGAGGTTTTATTGAGAGTAATCCTTATACAT	+	49458786	49458825	49458826	49459286	49458845	49458846	Pper_target_1997_genes_0_24148948
chr1	CAGTTTGTTTAACTCTCATGTTTCTATTTGCTTCGAATAC	+	49495127	49495166	49495167	49495627	49495168	49495169	Pper_target_1998_genes_0_24148949
chr1	AGTTCTTGTAACAATTTTTGGTCCCTTTCATAAGTAAAAT	+	49498122	49498161	49498162	49498622	49498185	49498186	Pper_target_1999_genes_0_24148950
chr1	GTTTGTATCAGTGGTCTATTAGTGGTCTATTCTGAGAGAG	+	49560947	49560986	49560987	49561447	49560990	49560991	Pper_target_2000_genes_0_24148951
chr1	ATCCCTAATCAATAACTGAGGTAATTTCCCATAGTCCAAG	+	49581414	49581453	49581454	49581914	49581458	49581459	Pper_target_2001_genes_0_24148952
chr1	CAATTTGTCAACTTTCATATTTGCATGATTGCATCAGAAC	+	49584445	49584484	49584485	49584945	49584498	49584499	Pper_target_2002_genes_0_24148953
chr1	TCGAAGTATTTTTCATTTTAAACCCAAAAGTCTTAAATCC	+	49587466	49587505	49587506	49587966	49587516	49587517	Pper_target_2003_genes_0_24148954
chr1	ATTTATTTAATAAATAAACGGGTGTTACAATAGGATGATG	+	49627984	49628023	49628024	49628484	49628042	49628043	Pper_target_2004_genes_0_24148955
chr1	GACGTGGGGGAAGACGGATGAAGATGGACGTTGTCATTGG	+	49631632	49631671	49631672	49632132	49631696	49631697	Pper_target_2005_genes_0_24148956
chr1	ATGAATAATGATGTTAAAGAAGAAAGGATAAAGGAAGAAG	-	49637710	49637749	49637250	49637710	49637699	49637700	Pper_target_2007_genes_0_24148958
chr1	ATTGAGATTGGTGGTAATTGGGTGTTTCTCATTAGTTAGG	+	49640705	49640744	49640745	49641205	49640757	49640758	Pper_target_2008_genes_0_24148959
chr1	TATAGAATTAAAAATAGAAAAATCATAGTCTTTTAATGAG	+	49666540	49666579	49666580	49667040	49666602	49666603	Pper_target_2009_genes_0_24148960
chr1	CATTAGATTTTAATAAATCTAGCATATAATTGGGTTTTGG	+	49670332	49670371	49670372	49670832	49670391	49670392	Pper_target_2010_genes_0_24148961
chr1	CAATCGGTACTCTCATTTAGAATATTGAATCGTTCACTTC	+	49685154	49685193	49685194	49685654	49685195	49685196	Pper_target_2011_genes_0_24148962
chr1	AAATGTCAAATTAAGCTGGAAATCATAAAAGGTTTGACTA	+	49688191	49688230	49688231	49688691	49688242	49688243	Pper_target_2012_genes_0_24148963
chr1	CACGGCAGCACTGTTGCCTCAGTTCCTTTCCTTTCCACGA	+	49715152	49715191	49715192	49715652	49715209	49715210	Pper_target_2014_genes_0_24148965
chr1	CTCCGTTTGAGCTACTTTCTTCATTTTGTTTGACAATGAG	+	49803530	49803569	49803570	49804030	49803592	49803593	Pper_target_2015_genes_0_24148966
chr1	TAGTTATGATCCTGTGGGGAGATCTTAATGTTAGCTCCAG	+	49962988	49963027	49963028	49963488	49963046	49963047	Pper_target_2016_genes_0_24148967
chr1	CTGAGCACTGGTTTCTATTCTTATAGTTTGATCAGATGAG	+	49966019	49966058	49966059	49966519	49966079	49966080	Pper_target_2017_genes_0_24148968
chr1	GGATCATTGACCATTAAATTCTTTATTATTGTTAAAAACC	+	50057742	50057781	50057782	50058242	50057805	50057806	Pper_target_2018_genes_0_24148969
chr1	CTTTGCTCACCTGCCCTCCTGTAACAAATAAATAAATAAC	+	50060762	50060801	50060802	50061262	50060818	50060819	Pper_target_2019_genes_0_24148970
chr1	TGTATTTTTTGAACTCTGTATCTAGAAAATTAATGAGAAA	+	50063785	50063824	50063825	50064285	50063847	50063848	Pper_target_2020_genes_0_24148971
chr1	TCTAAGGATGCGAAGGAAGTATAATTTGAGTATTGTTATT	+	50124837	50124876	50124877	50125337	50124900	50124901	Pper_target_2021_genes_0_24148972
chr1	TTACTTATTCAAACTCCACAAGGACTAAAATACCCCTAAG	+	50129033	50129072	50129073	50129533	50129081	50129082	Pper_target_2022_genes_0_24148973
chr1	CAAATGTGTACTATGTGCCATATCTAACATCAAACTCTTG	+	50139539	50139578	50139579	50140039	50139596	50139597	Pper_target_2024_genes_0_24148975
chr1	CATAGCTTGTTGTGACTCTCAAATGGCCATTAGGCTTCTG	+	50153998	50154037	50154038	50154498	50154053	50154054	Pper_target_2025_genes_0_24148976
chr1	TGGGATAATGCACATTCACACCACAACGACCCACTTACCC	+	50161742	50161781	50161782	50162242	50161806	50161807	Pper_target_2026_genes_0_24148977
chr1	AATTATTTACATGTGTGGATCTATTAATTTGTAGGAAATG	+	50165517	50165556	50165557	50166017	50165574	50165575	Pper_target_2027_genes_0_24148978
chr1	TTTATGATCTCTTTCTGTTTTGAATTTTGTTATCAATTAG	+	50171214	50171253	50171254	50171714	50171275	50171276	Pper_target_2028_genes_0_24148979
chr1	ATAGCGAAAAAGATAAGACATGAAATATCCCAACATAGTG	+	50179277	50179316	50179317	50179777	50179325	50179326	Pper_target_2030_genes_0_24148981
chr1	GTGTAACAGAGCTCATACTACATGATGTATGTTATTTTAC	+	50183270	50183309	50183310	50183770	50183315	50183316	Pper_target_2031_genes_0_24148982
chr1	ACGCGAAAACGTGTAGATGAGCGTGGACTCGAGAAGGAAG	+	50186327	50186366	50186367	50186827	50186376	50186377	Pper_target_2032_genes_0_24148983
chr1	GTTAAAATACATTATATTAGTCTCCATAGCAGTTTTGAGG	+	50228206	50228245	50228246	50228706	50228255	50228256	Pper_target_2033_genes_0_24148984
chr1	TATTTCACGAAAAAGAGAGACGAAATGGTTATGAAAATAG	+	50231344	50231383	50231384	50231844	50231385	50231386	Pper_target_2034_genes_0_24148985
chr1	GATTTTAGTGTGTGCAATTTTTGAGTTCTGATTAAGTATC	+	50235220	50235259	50235260	50235720	50235264	50235265	Pper_target_2035_genes_0_24148986
chr1	ATGCCTCATTTTAGTTGCATTATAACAGTTTCATAAATAG	+	50251304	50251343	50251344	50251804	50251344	50251345	Pper_target_2037_genes_0_24148988
chr1	AAGCATATTATTTCCGTCTGAATCTTTAAGAGGAGTTATC	-	50254352	50254391	50253892	50254352	50254345	50254346	Pper_target_2038_genes_0_24148989
chr1	TCCTGAACATGATTTCCCAATCATCTAAGGCCTCCAGCTC	+	50313770	50313809	50313810	50314270	50313820	50313821	Pper_target_2039_genes_0_24148990
chr1	TATCACTATTGTGAATATTGTGATGCAATTAGACAAGTTC	+	50319134	50319173	50319174	50319634	50319198	50319199	Pper_target_2040_genes_0_24148991
chr1	CTTTGATTCGGTAGATACTCATACACAAGGATATTCTCAC	+	50376423	50376462	50376463	50376923	50376478	50376479	Pper_target_2041_genes_0_24148992
chr1	AGTCGAGTGTGGCCCGACTAGTTCGCAAGGCCTGTAAGTC	+	50422545	50422584	50422585	50423045	50422590	50422591	Pper_target_2043_genes_0_24148994
chr1	GTAGAAGCATCGCAATATGTAAGTGATTAAAATGAATATG	+	50471596	50471635	50471636	50472096	50471656	50471657	Pper_target_2044_genes_0_24148995
chr1	CCTGGGAGATTTTTTGTTTTTCAAAGATTTAAATTTATCT	+	50487151	50487190	50487191	50487651	50487210	50487211	Pper_target_2046_genes_0_24148997
chr1	TGAAATTCAGGTGAAACAAGAGAATAGAGACAAATTGTTG	+	50490450	50490489	50490490	50490950	50490501	50490502	Pper_target_2047_genes_0_24148998
chr1	ATATAACTAAAGATTATACACAAGACTGCAAAAAGTATGG	+	50493765	50493804	50493805	50494265	50493829	50493830	Pper_target_2048_genes_0_24148999
chr1	GGGGAATGTTAGCTACATCACTTCCTCTTTCCATTGCTAC	-	50498004	50498043	50497544	50498004	50497991	50497992	Pper_target_2049_genes_0_24149000
chr1	CCTTTAATTTGGATAGGTATGTCCATATTTAGTCTTTTAC	+	50508374	50508413	50508414	50508874	50508430	50508431	Pper_target_2050_genes_0_24149001
chr1	CACCAAAAACCCCATCGTCAATGTCTACCGACCATTTGTG	+	50511599	50511638	50511639	50512099	50511640	50511641	Pper_target_2051_genes_0_24149002
chr1	GGAGGGATTGGGAGTTGATTTTTGGGTTTTGGTTTTCTTG	+	50516559	50516598	50516599	50517059	50516614	50516615	Pper_target_2052_genes_0_24149003
chr1	ATTAGTAGCTTGTAGGGATTTTTTGAAAGTAAAAGTTTAC	+	50554827	50554866	50554867	50555327	50554878	50554879	Pper_target_2054_genes_0_24149005
chr1	ATCTTTTTATTGGTTTTATGTAGCTCATTAGCGGTCATTG	+	50579554	50579593	50579594	50580054	50579610	50579611	Pper_target_2055_genes_0_24149006
chr1	AGGTGAAGTAGCTAGAAGTCTAGAACCCCATATTTTAACC	+	50582844	50582883	50582884	50583344	50582900	50582901	Pper_target_2056_genes_0_24149007
chr1	ATTTTTCATATATAATTCTCACATATACATTCAGTTATGG	+	50618286	50618325	50618326	50618786	50618330	50618331	Pper_target_2057_genes_0_24149008
chr1	GAACATAGGATAAAGAAATGTGAACATAATGTGGTGTTAG	+	50635042	50635081	50635082	50635542	50635104	50635105	Pper_target_2059_genes_0_24149010
chr1	AGGCTGAACTTCTGGAAGTGCTTTTTCATTTTATAAAAAA	+	50638645	50638684	50638685	50639145	50638704	50638705	Pper_target_2060_genes_0_24149011
chr1	AGTGAATATTTCAAACAATTGGGAAAAAAATAATGATTTC	+	50642835	50642874	50642875	50643335	50642888	50642889	Pper_target_2061_genes_0_24149012
chr1	AAATCTTTATGTGATGCATAAGTAACAAAAATTCTAACAA	+	50653664	50653703	50653704	50654164	50653728	50653729	Pper_target_2063_genes_0_24149014
chr1	GCATAAGAAGCTTTCTCGAAATGCTATGACATATTTCTCC	+	50712441	50712480	50712481	50712941	50712502	50712503	Pper_target_2064_genes_0_24149015
chr1	AGAAATATAAGAATAATATCTATAACAATAAATGGAAAAG	+	50717118	50717157	50717158	50717618	50717172	50717173	Pper_target_2065_genes_0_24149016
chr1	TTCGCATGTAAAGATTACAAACACAGAGCATCAAAGAAAC	+	50721427	50721466	50721467	50721927	50721472	50721473	Pper_target_2066_genes_0_24149017
chr1	AGTCCTTTAGCTCCGTGACCGGGTCGGAACCCAATATTTC	+	50725323	50725362	50725363	50725823	50725383	50725384	Pper_target_2067_genes_0_24149018
chr1	GCTGTGACTGCTTCAGGTTCTTGATCTATAAAATGTTGTG	+	50732604	50732643	50732644	50733104	50732662	50732663	Pper_target_2069_genes_0_24149020
chr1	TCTTGTTATCAAACTCTATCACATTCATCCAAACTTCTTA	+	50783219	50783258	50783259	50783719	50783283	50783284	Pper_target_2071_genes_0_24149022
chr1	AACTCCTTTCACCATCATCACTAGCAATTCAAAACATAAG	+	50786493	50786532	50786533	50786993	50786554	50786555	Pper_target_2072_genes_0_24149023
chr1	AAAAAATAAAATGGTTGGAAATGAAGGGTCTAGTAAGAAA	+	50815595	50815634	50815635	50816095	50815658	50815659	Pper_target_2073_genes_0_24149024
chr1	ATCGTGGTCGGTAAATACGAATTTCATGCCTTCAACATAC	+	50818788	50818827	50818828	50819288	50818833	50818834	Pper_target_2074_genes_0_24149025
chr1	ATACAAAAAGAAACTAGGACCTATACTATTCCACTACCTG	+	50821794	50821833	50821834	50822294	50821855	50821856	Pper_target_2075_genes_0_24149026
chr1	CCTGTTAGAGCATTTAAACCGAACACAACCTTTGCCCTAC	+	50824905	50824944	50824945	50825405	50824952	50824953	Pper_target_2076_genes_0_24149027
chr1	CCATAAATACTAGCATACTAACATTTTTCCTTTTAATCAT	+	50832554	50832593	50832594	50833054	50832603	50832604	Pper_target_2078_genes_0_24149029
chr1	ATTGTCTCTCAGCATTTAAATAATGCTATGGAAGATACAG	+	50838635	50838674	50838675	50839135	50838698	50838699	Pper_target_2079_genes_0_24149030
chr1	TGATTTGAACTTTAGAAACATTCGTTTGTACACGAGTTAG	+	50842322	50842361	50842362	50842822	50842379	50842380	Pper_target_2080_genes_0_24149031
chr1	CTTGAATAGTGGACAGTTGTTGTAGGTTGTGGTGATAAAG	+	50845360	50845399	50845400	50845860	50845419	50845420	Pper_target_2081_genes_0_24149032
chr1	GTGATGAAGATTCTATGGAAACCTCAAAAGACACTGATAC	+	50848621	50848660	50848661	50849121	50848666	50848667	Pper_target_2082_genes_0_24149033
chr1	TTGGTGGGGAGGTCGGGCTGATACACAGGAAATATTGCAG	+	50852039	50852078	50852079	50852539	50852084	50852085	Pper_target_2083_genes_0_24149034
chr1	TCCACAGAATTAAACATAAAGAAAACCATTCTTGAATTTG	+	50855359	50855398	50855399	50855859	50855430	50855431	Pper_target_2084_genes_0_24149035
chr1	TAATCTGTAATTTCAGACAATAAACATGTGAAATCCTTTG	+	50858424	50858463	50858464	50858924	50858475	50858476	Pper_target_2085_genes_0_24149036
chr1	CAAGAACTATCTTACCGTTTTAGGTCGTTTTCTTTATTTG	+	50861418	50861457	50861458	50861918	50861486	50861487	Pper_target_2086_genes_0_24149037
chr1	TCAACAAAACCGGGCTGCTTCCATCCACCTGTCTCTTATT	+	50865726	50865765	50865766	50866226	50865783	50865784	Pper_target_2087_genes_0_24149038
chr1	ACATGCTTTCATATCGGTTAAAAAATGCATTTTCAACAAC	+	50869296	50869335	50869336	50869796	50869353	50869354	Pper_target_2088_genes_0_24149039
chr1	ATGACCCTTTGAAAGAATTATCAAGTCTCATCCAAATAAT	+	50898616	50898655	50898656	50899116	50898680	50898681	Pper_target_2089_genes_0_24149040
chr1	TGTCAACAATATTTGGATACAAGAATTATGAGCCAAAACG	+	50901832	50901871	50901872	50902332	50901889	50901890	Pper_target_2090_genes_0_24149041
chr1	AATCCACCACAAGTAAAATGCGATAGTTAATAGTTGTAAG	+	50907496	50907535	50907536	50907996	50907553	50907554	Pper_target_2091_genes_0_24149042
chr1	CCTTTGATCCATACCTGATGATGTCATCCAGCTCTTCCTA	+	50910597	50910636	50910637	50911097	50910659	50910660	Pper_target_2092_genes_0_24149043
chr1	CCCACATTCATTTGCTTGCGAAAATTGTTTACTTTTGTCC	+	50913639	50913678	50913679	50914139	50913688	50913689	Pper_target_2093_genes_0_24149044
chr1	CATCGTTAAAATGAACACTTCGGTCCACCTCCTAAACTTG	+	50920090	50920129	50920130	50920590	50920146	50920147	Pper_target_2095_genes_0_24149046
chr1	GAAGCCATGGAGAGCTTTTTAGAACCTTGGGTACATATTG	-	50923158	50923197	50922698	50923158	50923147	50923148	Pper_target_2096_genes_0_24149047
chr1	CATTCAAAAATTCTCCTCCCTCCAAATTCATTTGATAAAC	+	50943889	50943928	50943929	50944389	50943932	50943933	Pper_target_2098_genes_0_24149049
chr1	CTTGATGATTGGATATAATGATATAGAGGTGGCCACACAG	+	50947378	50947417	50947418	50947878	50947426	50947427	Pper_target_2099_genes_0_24149050
chr1	GAATTTATGACCGAACTTGAAATTCTTCAGGATTATAAAC	+	50950378	50950417	50950418	50950878	50950431	50950432	Pper_target_2100_genes_0_24149051
chr1	ATAATAGAAATTGAGTTTGATTTGTTTTGTCTTGTATAAC	+	50958617	50958656	50958657	50959117	50958681	50958682	Pper_target_2101_genes_0_24149052
chr1	TCAGCTAACAGCAACTTAGGCCCACTTTTACTAATGTTTG	+	50961957	50961996	50961997	50962457	50962000	50962001	Pper_target_2102_genes_0_24149053
chr1	GCCCAGATATAGATCATATTCTCATTAGACTTCGACAAGC	+	51002048	51002087	51002088	51002548	51002101	51002102	Pper_target_2105_genes_0_24149056
chr1	AAAGCATCAGATATCTATTCATTGGGGGTAGTTTTCTTTG	+	51007633	51007672	51007673	51008133	51007674	51007675	Pper_target_2106_genes_0_24149057
chr1	TTATATATTTGTAATCATATTCTTGTGTATTGCTTGATCC	+	51011865	51011904	51011905	51012365	51011928	51011929	Pper_target_2107_genes_0_24149058
chr1	GTAATATAATCCATATAAATGAAGTCTTTGAATAAAAACC	+	51041652	51041691	51041692	51042152	51041715	51041716	Pper_target_2109_genes_0_24149060
chr1	AGCACACACTTAAGCTCAAAAGACACATTCAAGGGCTAGG	+	51053833	51053872	51053873	51054333	51053896	51053897	Pper_target_2110_genes_0_24149061
chr1	AGGAGGAGCAGGGTATCTGATAAGTCCTTATATTCAATTC	+	51057066	51057105	51057106	51057566	51057121	51057122	Pper_target_2111_genes_0_24149062
chr1	ACATTTCGATGCCAGGTGGTCCCTGAGGAATGATTATATG	+	51069454	51069493	51069494	51069954	51069518	51069519	Pper_target_2112_genes_0_24149063
chr1	GACAGTTGGCAATTTGACAAGGACCAAATTTATAATTTAG	+	51072826	51072865	51072866	51073326	51072883	51072884	Pper_target_2113_genes_0_24149064
chr1	ACTTTCTCCATAATACTTATACTTACTCCTTCATCATTTC	+	51078416	51078455	51078456	51078916	51078476	51078477	Pper_target_2114_genes_0_24149065
chr1	GATGAAATCTTTTTTACTCAAAATAGAGGACTCAATGAAG	+	51081430	51081469	51081470	51081930	51081479	51081480	Pper_target_2115_genes_0_24149066
chr1	CCCTCAACCCAGTCAAGGTTTGCTTTTTCTTTTTCATAAC	+	51084718	51084757	51084758	51085218	51084763	51084764	Pper_target_2116_genes_0_24149067
chr1	ATCCTACTAGAATACATTGGCTACAAAACTCTTTTAACTT	+	51149190	51149229	51149230	51149690	51149230	51149231	Pper_target_2118_genes_0_24149069
chr1	TCTGCATTGATATTGCTCGTGGGTTGATATACCTTCATAG	+	51152418	51152457	51152458	51152918	51152460	51152461	Pper_target_2119_genes_0_24149070
chr1	CACAGTATAGTTTAATGGAGTGGTTGAATATGATGAAATG	+	51155659	51155698	51155699	51156159	51155708	51155709	Pper_target_2120_genes_0_24149071
chr1	CACCAAGGGTGGCATGACATAATAACCAAAAGCATATCAG	+	51163679	51163718	51163719	51164179	51163733	51163734	Pper_target_2121_genes_0_24149072
chr1	TAGTTAATGCGGTGGTATTACATAATGTCATACTCCTAAA	-	51166764	51166803	51166304	51166764	51166745	51166746	Pper_target_2122_genes_0_24149073
chr1	CTCCATCTCCTGGTTCTGAAAACATGTAGGTGCTAGAATG	-	51169759	51169798	51169299	51169759	51169754	51169755	Pper_target_2123_genes_0_24149074
chr1	TATTTCGAATCTAAATATCCAAATAAAGATAAAAGCTCAG	+	51174929	51174968	51174969	51175429	51174973	51174975	Pper_target_2124_genes_0_24149075
chr1	AATCTAACATTCTTACTCTCTAATCTTCCAGATGTTCTTC	+	51178620	51178659	51178660	51179120	51178664	51178665	Pper_target_2125_genes_0_24149076
chr1	TGCTCCTGGAGTTGTTATTGTTTTCTTTGGTTTCATTTCC	+	51181828	51181867	51181868	51182328	51181891	51181892	Pper_target_2126_genes_0_24149077
chr1	AAACTGATAAGTTATGAAGGAACTATGTCTGGCCTTATTG	+	51187942	51187981	51187982	51188442	51187999	51188000	Pper_target_2128_genes_0_24149079
chr1	ATCATCACAAACATTATGTCGTCTTCATCTTCCTACAAAC	+	51194626	51194665	51194666	51195126	51194680	51194681	Pper_target_2129_genes_0_24149080
chr1	TTAATTTATACAGGTCAAACATGAAGAAATCAAGAAATTG	+	51209207	51209246	51209247	51209707	51209265	51209266	Pper_target_2130_genes_0_24149081
chr1	ATCCATACATCACATGGCGACAACCATTGGCTAACACACA	+	51214623	51214662	51214663	51215123	51214674	51214675	Pper_target_2131_genes_0_24149082
chr1	CCTGATTTTCGTGGGATTTGTTCTAACTCAAAAGAATATG	+	51231468	51231507	51231508	51231968	51231511	51231512	Pper_target_2132_genes_0_24149083
chr1	CCAAATTAACCCTCCTTTTGCAACAAAATTGTGTATACTG	+	51240069	51240108	51240109	51240569	51240119	51240120	Pper_target_2134_genes_0_24149085
chr1	CCGTGCACTAACTCGAGTCTTCTTGTTGCTCTGAAGTTGG	+	51243501	51243540	51243541	51244001	51243563	51243564	Pper_target_2135_genes_0_24149086
chr1	ACTACTCCAAAGGAATATATATCTGATGCTTTTTTCAGCC	+	51246744	51246783	51246784	51247244	51246793	51246794	Pper_target_2136_genes_0_24149087
chr1	GGCAGAAGGCAATGGAAGAAGAAGTTACAACCTTAGAGAG	-	51251371	51251410	51250911	51251371	51251365	51251366	Pper_target_2137_genes_0_24149088
chr1	ACTTTTTAAGCAAAGGTTTTTTATCTGCTAAGTTATTATC	+	51328279	51328318	51328319	51328779	51328336	51328337	Pper_target_2138_genes_0_24149089
chr1	AACCTAGTTACTAAAGGTACCGGAAAACTAGTTACCAAAC	+	51332892	51332931	51332932	51333392	51332939	51332940	Pper_target_2139_genes_0_24149090
chr1	TTTGCCTTTATGGAAAATCGATAATGTTGTATTTGGTACT	+	51350262	51350301	51350302	51350762	51350323	51350324	Pper_target_2140_genes_0_24149091
chr1	GTGTTGGCGATAAGGAGCTAAATGATATAAATTTCAGAAT	+	51571608	51571647	51571648	51572108	51571662	51571663	Pper_target_2141_intergenic_0_24149092
chr1	TTGGGCTTCTGTTCGTTTGGAACCATCTTCAGATCTCGTC	+	51825617	51825656	51825657	51826117	51825670	51825671	Pper_target_2144_genes_0_24149095
chr1	TCTAGAAAAAATTAGATAATTTTAAGATAGTATTTTGTCG	+	51829142	51829181	51829182	51829642	51829197	51829198	Pper_target_2145_genes_0_24149096
chr1	AAAATTCAAGATTTCACCCTTTTAAATAAATGTAATAACC	+	51865433	51865472	51865473	51865933	51865493	51865494	Pper_target_2147_genes_0_24149098
chr1	ACATGTCCACATAAATCAATATAGCTTTTGGAAGATCTGA	+	51868833	51868872	51868873	51869333	51868895	51868896	Pper_target_2148_genes_0_24149099
chr1	GCGGGTCAAAATATACAAATCCGAACACGACCTATTTAAC	+	51872119	51872158	51872159	51872619	51872173	51872174	Pper_target_2149_genes_0_24149100
chr1	AATCTATCTCTGACGTCACTATTTTCAGTCTTGGATATTG	+	51875601	51875640	51875641	51876101	51875664	51875665	Pper_target_2150_genes_0_24149101
chr1	AAAAAAGTTAACCTTTGGTTATTGGAGTTTGCCTGTACTC	+	51882425	51882464	51882465	51882925	51882471	51882472	Pper_target_2151_genes_0_24149102
chr1	AAAAAAGGTTATATGGAAAAAATGTAATTATTTCTCTGTA	+	51885496	51885535	51885536	51885996	51885543	51885544	Pper_target_2152_genes_0_24149103
chr1	AGATATATTAATAGGTATTTAGCAAACTCCTTTGTACACC	+	51888489	51888528	51888529	51888989	51888545	51888546	Pper_target_2153_genes_0_24149104
chr1	TATGAGGTTTAACCATCACCATTGATCAAACAATCTATTC	+	52024028	52024067	52024068	52024528	52024087	52024088	Pper_target_2154_genes_0_24149105
chr1	ACATTTTTTTCACAGGCCTAAAGAACACCATGATTTCAAC	+	52027117	52027156	52027157	52027617	52027159	52027160	Pper_target_2155_genes_0_24149106
chr1	GTTTCTTCACGAAACACACTATTTAATCTATTAAGTTACC	+	52030791	52030830	52030831	52031291	52030837	52030838	Pper_target_2156_genes_0_24149107
chr1	TCAGAGTGTACACAACTCGAAGGCAGACGCACACCATTTC	+	52060542	52060581	52060582	52061042	52060603	52060604	Pper_target_2157_genes_0_24149108
chr1	TTACATACCTTCAAGATAAAATAGAGGTACATGCAATATG	+	52063668	52063707	52063708	52064168	52063718	52063719	Pper_target_2158_genes_0_24149109
chr1	TCAACATATATTGTGAATGGATATTGATGGGTCTGAAAAA	+	52094247	52094286	52094287	52094747	52094307	52094308	Pper_target_2160_genes_0_24149111
chr1	TCGGAACAAGATGTCAATGAGCTACGAGATGGTTGATTGC	+	52097921	52097960	52097961	52098421	52097965	52097966	Pper_target_2161_genes_0_24149112
chr1	TCTTTCAGAAATTTAATTGAACAAGATCTTGTGCCAGGCA	+	52117573	52117612	52117613	52118073	52117622	52117623	Pper_target_2162_genes_0_24149113
chr1	ATGGAAAAGGCGCTGCAAGCTGCTACTAATAATTGAAGTG	+	52127822	52127861	52127862	52128322	52127864	52127865	Pper_target_2163_genes_0_24149114
chr1	AATAGAATATTAGAAATTTAATTCACAATGATCCATATAA	+	52151477	52151516	52151517	52151977	52151518	52151519	Pper_target_2164_genes_0_24149115
chr1	CCATGTATGATGATCAAAATACCCCTGGAAAGACAAAAGC	+	52154848	52154887	52154888	52155348	52154904	52154905	Pper_target_2165_genes_0_24149116
chr1	TTTGGTTCGATTGGTAACATGTTGGTTTTCTGTGATACAT	+	52157899	52157938	52157939	52158399	52157944	52157945	Pper_target_2166_genes_0_24149117
chr1	CAAATAAACTTCCAATACTTTCCATATATATCATAATATA	-	52320473	52320512	52320013	52320473	52320460	52320461	Pper_target_2167_genes_0_24149118
chr1	CTTTTATTGTGCATGAAAAATATGCTGAGAATGAATTTGG	+	52327463	52327502	52327503	52327963	52327519	52327520	Pper_target_2169_genes_0_24149120
chr1	TTGAAAATAGAAACACCCCATTTTTACATATATCTCCTTG	+	52488250	52488289	52488290	52488750	52488342	52488343	Pper_target_2170_genes_0_24149121
chr1	TTATCTTTAGCTGTCACAAATAGGTGGCCTCTTCATCAGC	+	52679288	52679327	52679328	52679788	52679352	52679353	Pper_target_2171_genes_0_24149122
chr1	TCACACAACTGAAAAAATTAGAAAAGGAGAAAAAAATTAC	+	52682709	52682748	52682749	52683209	52682756	52682757	Pper_target_2172_genes_0_24149123
chr1	GACAACACTAAGTGTTTGGTTTCTTCAGCATATATTGCAC	+	52686795	52686834	52686835	52687295	52686841	52686842	Pper_target_2173_genes_0_24149124
chr1	TGGGTTTCTGGTTGCGACAGTGGCGAGATGTGGTGTTTTG	+	52745368	52745407	52745408	52745868	52745417	52745418	Pper_target_2175_genes_0_24149126
chr1	ACTATCATGATCATTATCGTGGTTTCATCGTGAAATTTAT	+	52842868	52842907	52842908	52843368	52842918	52842919	Pper_target_2176_genes_0_24149127
chr1	CGGGGATAAGTCTAATGTCGGGGTTGACCCGATGTTGTTT	-	53039680	53039719	53039220	53039680	53039657	53039658	Pper_target_2177_genes_0_24149128
chr1	GAACTTTAGAACAAAAGTTGAAGTAGAGACTGGGAAAAAG	+	53096793	53096832	53096833	53097293	53096843	53096844	Pper_target_2179_genes_0_24149130
chr1	GGTAGCTTCATTGCAATTGCTATCAGTGTGATAGAAGCAG	-	53101229	53101268	53100769	53101229	53101226	53101227	Pper_target_2180_genes_0_24149131
chr1	GATAAAGTGAGCAACTTTATGTGATTAGGGACCTAGAAGG	+	53123166	53123205	53123206	53123666	53123214	53123215	Pper_target_2181_genes_0_24149132
chr1	GTTATTCTTCCTGTTACTATATTTATTTTGACTAAAGCTC	+	53127289	53127328	53127329	53127789	53127329	53127330	Pper_target_2182_genes_0_24149133
chr1	ACAAGGAGATTCAAAAGGAAGAAGATAAGGATTAAGGAAC	+	53130312	53130351	53130352	53130812	53130364	53130365	Pper_target_2183_genes_0_24149134
chr1	AATTACCCTTTGTCATCCTAAGGTATTGACTAAATCACCA	+	53133388	53133427	53133428	53133888	53133443	53133444	Pper_target_2184_genes_0_24149135
chr1	AAAGGATTATGATGATTTTGTTTAGAGGGAGTTTGGATAC	+	53140693	53140732	53140733	53141193	53140743	53140744	Pper_target_2185_genes_0_24149136
chr1	ATCTAAATGTGTTCCGAGTGGAGAAGCAACGGATCCAAAG	+	53145500	53145539	53145540	53146000	53145557	53145558	Pper_target_2186_genes_0_24149137
chr1	TCGACATGACCGCATTGCATCCACCAGTAGTCCACACTTA	+	53246233	53246272	53246273	53246733	53246290	53246291	Pper_target_2187_genes_0_24149138
chr1	AAGCGGTGGTCCAATAGCATCACTTTTTTCATAGAATTTC	+	53249363	53249402	53249403	53249863	53249420	53249421	Pper_target_2188_genes_0_24149139
chr1	CACGAGTCTGAAGGTAAAGAGCCGAGGAATCTTATGAAGC	+	53252541	53252580	53252581	53253041	53252584	53252585	Pper_target_2189_genes_0_24149140
chr1	AACTGACTGACTGTTAACCTTAATGACCCGGGACCAAATC	+	53257672	53257711	53257712	53258172	53257718	53257719	Pper_target_2190_genes_0_24149141
chr1	CCGGCATTTTCTTAACCCCTCTTCCCTGTTTTCTTCAAAC	+	53260879	53260918	53260919	53261379	53260920	53260921	Pper_target_2191_genes_0_24149142
chr1	GTAGCTGTAACATTAACTACCATTGCTCTTGCGCTTCCTG	+	53333451	53333490	53333491	53333951	53333512	53333513	Pper_target_2192_genes_0_24149143
chr1	ACTATTCAATAGAGGGGCAGTATTGTCATTTCCTGCTTCC	+	53336837	53336876	53336877	53337337	53336878	53336879	Pper_target_2193_genes_0_24149144
chr1	GAAATGGAGCAGGCACCACCTACATGTGTTCCGAGTCGAG	+	53343989	53344028	53344029	53344489	53344051	53344052	Pper_target_2194_genes_0_24149145
chr1	CAATCTGTCTATCGTGTCTGATATTCTTAGCTTCTTTTGC	+	53347802	53347841	53347842	53348302	53347865	53347866	Pper_target_2195_genes_0_24149146
chr1	TATAGCTTTATGAGATAAAGGAATAGATATATTCTAAAAC	+	53351019	53351058	53351059	53351519	53351076	53351077	Pper_target_2196_genes_0_24149147
chr1	GGTGTCGAATGTTAATTATTTTTTAATGCATTCTTAATTT	+	53377674	53377713	53377714	53378174	53377763	53377764	Pper_target_2197_genes_0_24149148
chr1	ATGCGAAGCTTTCAAAGAGAATATTACAAAATGCGCTCAA	+	53381624	53381663	53381664	53382124	53381671	53381672	Pper_target_2198_genes_0_24149149
chr1	TTCGACAATGATCAAGTTCCACCATTACATCCAGAAGAAG	+	53405362	53405401	53405402	53405862	53405424	53405425	Pper_target_2201_genes_0_24149152
chr1	TGACCCGTAGTCGCAGGCAACGGTAACCTAGATTTAGCAG	+	53410966	53411005	53411006	53411466	53411015	53411016	Pper_target_2202_genes_0_24149153
chr1	TACAACAAATCATTATCCATTTGTCCACTTCCCACAAACC	+	53414380	53414419	53414420	53414880	53414428	53414429	Pper_target_2203_genes_0_24149154
chr1	TCGTTTTAAAGATTTAAGCAAGACAATTTTTAATATTTGG	+	53420486	53420525	53420526	53420986	53420545	53420546	Pper_target_2205_genes_0_24149156
chr1	TCTTGTTACACCATCTGGGATAAAAGAGAATGTAGAAGAC	+	53428360	53428399	53428400	53428860	53428419	53428420	Pper_target_2206_genes_0_24149157
chr1	TTTTCGTATATATTTTTGTTTATTTCATTTTCGAGGTTTG	+	53439101	53439140	53439141	53439601	53439165	53439166	Pper_target_2207_genes_0_24149158
chr1	CAGTGAGACAAACCACTCGGCCATCTCCTAACTGAACAAC	+	53543504	53543543	53543544	53544004	53543549	53543550	Pper_target_2210_genes_0_24149161
chr1	TGGGCATACATAGGGTTATTTGGCCCATGTCTTGAGTATG	+	53547524	53547563	53547564	53548024	53547582	53547583	Pper_target_2211_genes_0_24149162
chr1	ATTGGCCTTCAAAAGTTTTCAAAACTCCAGAGAGAATCAT	+	53565528	53565567	53565568	53566028	53565573	53565574	Pper_target_2212_genes_0_24149163
chr1	TAACCCACTAACCCAAAATCCAAGCCCAAAATCCATAATC	+	53575988	53576027	53576028	53576488	53576038	53576039	Pper_target_2213_genes_0_24149164
chr1	TGGAGTTGATAAGAGATCAAACTGATCAAAATAATGAAAG	+	54049446	54049485	54049486	54049946	54049510	54049511	Pper_target_2216_genes_0_24149167
chr1	ATCTTAGATATTTAGGAAACTTTGGAAAACTGTAAAATTC	+	54052468	54052507	54052508	54052968	54052521	54052522	Pper_target_2217_genes_0_24149168
chr1	GAGTATTAACATATAATACTACCTGTTAGGCATGTCAAAC	+	54057361	54057400	54057401	54057861	54057418	54057419	Pper_target_2218_genes_0_24149169
chr1	TTCTTTACAAAGTACATCAAGAAAATCGTAAAAACATTAG	+	54155863	54155902	54155903	54156363	54155912	54155913	Pper_target_2219_genes_0_24149170
chr1	CACATACACAAAAGAAGATGAGGCAGAATCACCGACCTTC	+	54160416	54160455	54160456	54160916	54160479	54160480	Pper_target_2220_genes_0_24149171
chr1	CAAGTTAACAAGTATTGAAACGCAAATTGTCTTACTTACC	+	54170115	54170154	54170155	54170615	54170164	54170165	Pper_target_2221_genes_0_24149172
chr1	ATGTTTTTAACTGTTTACTTAAATAGGGAAGCATGAATAG	+	54174466	54174505	54174506	54174966	54174523	54174524	Pper_target_2222_genes_0_24149173
chr1	TTGCCATAAGTATTGGAAATTAAATGGGGTCTTTCTCAAG	+	54313482	54313521	54313522	54313982	54313538	54313539	Pper_target_2223_genes_0_24149174
chr1	GGTGAAGCTTCATATTGGAGGCTTCCACTTACAGGTGGTT	+	54316628	54316667	54316668	54317128	54316670	54316671	Pper_target_2224_genes_0_24149175
chr1	GTAGGGATGACAACCATAGAGGCACAGACTATTCTAGACA	-	54319881	54319920	54319421	54319881	54319860	54319861	Pper_target_2225_genes_0_24149176
chr1	GCTTTATGATGCTATCGTTGGATCATATCTATGGTTTGTC	+	54367120	54367159	54367160	54367620	54367160	54367161	Pper_target_2226_genes_0_24149177
chr1	CAAAGTACCATAACTCCCTCGTTCTAGGTCCGTTTCAACT	+	54370157	54370196	54370197	54370657	54370212	54370213	Pper_target_2227_genes_0_24149178
chr1	GAAAGTATAATTCAGAAGGATACTCAGCGTTGCATCTAGC	+	54373970	54374009	54374010	54374470	54374021	54374022	Pper_target_2228_genes_0_24149179
chr1	TGAGAAATTGTACCAAAAAATAAAACTAATTACAAAGAGG	+	54392773	54392812	54392813	54393273	54392822	54392823	Pper_target_2229_genes_0_24149180
chr1	CCTTCAGCTTGTCAGCTCTTTTGGCCATTTTTTCTTTCAT	+	54441645	54441684	54441685	54442145	54441704	54441705	Pper_target_2230_genes_0_24149181
chr1	GTGTTATTTTAGTGATAAAAGAAGAAAAAGGAGCATGAAG	+	54653742	54653781	54653782	54654242	54653783	54653784	Pper_target_2231_intergenic_0_24149182
chr1	CGACTTGTGGCTTTTGTCCATTATATATATGGTTGATTGG	+	54797775	54797814	54797815	54798275	54797818	54797819	Pper_target_2232_genes_0_24149183
chr1	ACTGCTCATTGATGCTTAAGGTACAACTTTCCACAATATG	-	54827413	54827452	54826953	54827413	54827406	54827407	Pper_target_2233_genes_0_24149184
chr1	CTCGTATCCATAGGTTTTTATCTTTCTTTTCGTTACATTC	+	54830952	54830991	54830992	54831452	54830993	54830994	Pper_target_2234_genes_0_24149185
chr1	ACAACCCCACAAGACTCCATCTCTTTAAACCAAATCACAG	+	54862461	54862500	54862501	54862961	54862504	54862505	Pper_target_2237_genes_0_24149188
chr1	CTCATTTTGGTGCTTGTGTTCGCTTTTGAAGAAATGAGTC	+	54873719	54873758	54873759	54874219	54873760	54873761	Pper_target_2240_genes_0_24149191
chr1	GTTGTAATTAATAAGCTGCAGATATGTACAAAAAGAACAC	+	54876727	54876766	54876767	54877227	54876780	54876781	Pper_target_2241_genes_0_24149192
chr1	TCCACATCATTATCATCATCTCCGTTGCCTCCTTCTGTAG	+	54894840	54894879	54894880	54895340	54894892	54894893	Pper_target_2242_genes_0_24149193
chr1	GCCCCATTTCAGTGTCCATCTTCTTGTAAGGTGTCTTTAG	+	54899330	54899369	54899370	54899830	54899371	54899372	Pper_target_2243_genes_0_24149194
chr1	GGGCAGCGCCCCTGGGAGCGGGGTCCAAGGTCAGCACGAG	+	54926912	54926951	54926952	54927412	54926974	54926975	Pper_target_2245_genes_0_24149196
chr1	TTGTATAATCCTATTATCAAATTTATCACCGTTCTTTCTC	+	54930165	54930204	54930205	54930665	54930216	54930217	Pper_target_2246_genes_0_24149197
chr1	GTAGTATTTATTATTTAACCTTACAAACAGAAAGATGCAG	+	55001560	55001599	55001600	55002060	55001601	55001602	Pper_target_2247_genes_0_24149198
chr1	TTAGCTTTGGTACCATCAGCTCCCACCAAAGAAACAGAAT	+	55057932	55057971	55057972	55058432	55057972	55057973	Pper_target_2249_genes_0_24149200
chr1	GCATGGAGCTCCATTCATAAAAAGCACCTTAAACAAATAA	+	55385099	55385138	55385139	55385599	55385139	55385140	Pper_target_2251_genes_0_24149202
chr1	TTGGGAGTCGTGACCAATGATGTGAAAGGAACTCATTTTG	+	55591714	55591753	55591754	55592214	55591771	55591772	Pper_target_2252_intergenic_0_24149203
chr1	ACAATTTGACATTCAGATATTAATACAGTTTTTGAAGATG	+	55620500	55620539	55620540	55621000	55620555	55620556	Pper_target_2253_genes_0_24149204
chr1	TATATTTCTCTCAAATATTATCCATGTTAATTTATTATTC	+	55642189	55642228	55642229	55642689	55642230	55642231	Pper_target_2255_genes_0_24149206
chr1	TCATCGTCTAAGCACATTTTTGGTTAGCACTGGGTTTGTA	-	55651224	55651263	55650764	55651224	55651210	55651211	Pper_target_2256_genes_0_24149207
chr1	GGCTCAAAATCATCGCAAAACCAGCAAAACGACAGACATC	+	55656338	55656377	55656378	55656838	55656380	55656381	Pper_target_2257_genes_0_24149208
chr1	AGGGACTAAAAGATTTACTTCAAAACAACACGATGTCAAC	+	55677903	55677942	55677943	55678403	55677961	55677962	Pper_target_2258_genes_0_24149209
chr1	CTCCATTGTTTTAGTTCAAAATTATGCGTCAAGATTTAAG	+	55684458	55684497	55684498	55684958	55684502	55684503	Pper_target_2259_genes_0_24149210
chr1	TCTTGAGATTCAATATAATGTATAAACCCTAGGCCCAAGC	+	55726607	55726646	55726647	55727107	55726659	55726660	Pper_target_2261_genes_0_24149212
chr1	AGTAATTTAATTATAACCAGAAAAACCCTAAATTCTCCAC	+	55733282	55733321	55733322	55733782	55733340	55733341	Pper_target_2262_genes_0_24149213
chr1	CTACTTGGAGTGAAGATCAATAATGGCTTCAACTTTCAAG	+	55753830	55753869	55753870	55754330	55753889	55753890	Pper_target_2263_genes_0_24149214
chr1	AAATTCATCATAATGGAAATAATACAATGGAATATGAAAC	+	55758796	55758835	55758836	55759296	55758839	55758840	Pper_target_2264_genes_0_24149215
chr1	GGTCATAGTGATAAGAGGTTGGGTCAGAGTACCGTATAAC	+	55764052	55764091	55764092	55764552	55764094	55764095	Pper_target_2265_genes_0_24149216
chr1	GTTGGGCAGTTTCTTTACTTTTAGAATTGTAAGAGTTTTC	+	55767235	55767274	55767275	55767735	55767292	55767293	Pper_target_2266_genes_0_24149217
chr1	ACCTTGTTTGAAATAGAGGGTGTGGTACATTATGGAATAG	+	55779060	55779099	55779100	55779560	55779121	55779122	Pper_target_2267_genes_0_24149218
chr1	CGTGGAAATATCATCAACACTTTTTGTCTCCTTCATAATC	+	56008304	56008343	56008344	56008804	56008347	56008348	Pper_target_2269_genes_0_24149220
chr1	TGGTTGAAATATACCTCATTTCAAAAAACAAATAAAATCC	+	56116865	56116904	56116905	56117365	56116908	56116909	Pper_target_2270_genes_0_24149221
chr1	GTCAGGCGGAAATATAGGGATCATAAGGAGATACTTGAGG	-	56120728	56120767	56120268	56120728	56120719	56120720	Pper_target_2271_genes_0_24149222
chr1	AAAAAACACTAGGAGATACATATGTGTATAACATGTTACT	+	56258755	56258794	56258795	56259255	56258798	56258799	Pper_target_2272_genes_0_24149223
chr1	TTAGCTGATTCCGAACTTATTTTTAGCCCATTATTTGTAT	+	56355205	56355244	56355245	56355705	56355269	56355270	Pper_target_2273_genes_0_24149224
chr1	TTTTCTTTGATCCCATATGTGTTTCTGTTCTTATTTTATG	+	56359525	56359564	56359565	56360025	56359579	56359580	Pper_target_2274_genes_0_24149225
chr1	TCGACGAGTACTATAAATTTCTTTTTGGTTGTTTTAGCTG	+	56469262	56469301	56469302	56469762	56469304	56469305	Pper_target_2275_genes_0_24149226
chr1	CAAAGCTAAAGTATTTAGCGTCGTGCTTTCTTCTGACATC	+	56594357	56594396	56594397	56594857	56594416	56594417	Pper_target_2277_genes_0_24149228
chr1	AATTTCTATCGTTTCATTTGACATACATTTCATTTATAGG	+	56620595	56620634	56620635	56621095	56620646	56620647	Pper_target_2278_genes_0_24149229
chr1	TATAGGATTGTTTGGTACCGAATTTAATACAAACTAAAAG	+	56623721	56623760	56623761	56624221	56623768	56623769	Pper_target_2279_genes_0_24149230
chr1	TTATTTGATTTGACATCAAGTTCAATTTTCATTATTTCCA	+	56626758	56626797	56626798	56627258	56626799	56626800	Pper_target_2280_genes_0_24149231
chr1	AAGTATCTGACTACAGACTACTGCATGCATATTGGATAAC	+	56629888	56629927	56629928	56630388	56629933	56629934	Pper_target_2281_genes_0_24149232
chr1	CTCTCACCGCAACCATGTCATCACAAGATTCCATCTCCTC	+	56831856	56831895	56831896	56832356	56831898	56831899	Pper_target_2282_intergenic_0_24149233
chr1	CCAATAGATCCATAAACAGACAATTAAAAGTGCGACAAAA	+	56895747	56895786	56895787	56896247	56895807	56895808	Pper_target_2283_genes_0_24149234
chr1	GTAAGAATGTGGATTGCAATAAAAACATGGCCTATAAGTT	+	56899507	56899546	56899547	56900007	56899552	56899553	Pper_target_2284_genes_0_24149235
chr1	TATATTCATATTATTATATTCACATTCACTCAACTTACGC	+	56902753	56902792	56902793	56903253	56902795	56902796	Pper_target_2285_genes_0_24149236
chr1	TTGACGCACTTGTCGTAGCGGCTACGGTCCAGTTGGCCTC	+	57102820	57102859	57102860	57103320	57102879	57102880	Pper_target_2286_intergenic_0_24149237
chr1	TAACTGATATTCTTTAAAGTTCATTAAATCCGCATGTTTC	+	57112820	57112859	57112860	57113320	57112876	57112877	Pper_target_2287_genes_0_24149238
chr1	TATTTTTCAATAATAACTTTCGTCATATCCTTGGAATTAG	+	57116313	57116352	57116353	57116813	57116373	57116374	Pper_target_2288_genes_0_24149239
chr1	ACTGCAAAATATATACTATGCAATGTGATTTTCATACGTT	+	57175245	57175284	57175285	57175745	57175307	57175308	Pper_target_2289_genes_0_24149240
chr1	TTCCGGAAACCTAAGACTCTCCAAAACAACATTCGCCAAC	+	57178343	57178382	57178383	57178843	57178393	57178394	Pper_target_2290_genes_0_24149241
chr1	TATCAAGCAGATTCGCACATAGAAAGTAAAGATTTAACAG	+	57181343	57181382	57181383	57181843	57181398	57181399	Pper_target_2291_genes_0_24149242
chr1	TTATACAGATTTAGGAAAAAGTTTATAATTGTATAAGTGA	+	57240531	57240570	57240571	57241031	57240575	57240576	Pper_target_2292_genes_0_24149243
chr1	AGAAAATGACAAAATAAAAAAGAACAAAAATGTAGAATTG	+	57245014	57245053	57245054	57245514	57245071	57245073	Pper_target_2293_genes_0_24149244
chr1	TAGCACAGCCATTTCTCGCTACCTTTGTTCATGTTCCATC	+	57248145	57248184	57248185	57248645	57248206	57248207	Pper_target_2294_genes_0_24149245
chr1	ATTGTCCTATTACAGTATAACCACCATTCTACCATGTTTT	+	57251285	57251324	57251325	57251785	57251346	57251347	Pper_target_2295_genes_0_24149246
chr1	ATTTTTTTAGCAAGTAATCAAGTATAATTGAAAACAAACC	-	57254808	57254847	57254348	57254808	57254795	57254796	Pper_target_2296_genes_0_24149247
chr1	AAATGACGTGATTTTCCTCGAGCCAAAAGTAATAAAACTC	+	57277079	57277118	57277119	57277579	57277120	57277121	Pper_target_2297_genes_0_24149248
chr1	GAGAATAGTATTCTGTGGAAAGGCGTAAGGGAAGACAATG	+	57280896	57280935	57280936	57281396	57280950	57280951	Pper_target_2298_genes_0_24149249
chr1	TCCCCAACCTCTATCTCATGATGACTTGTTGTTTCTGTTG	+	57285827	57285866	57285867	57286327	57285880	57285881	Pper_target_2299_genes_0_24149250
chr1	TTGCCAAATCAATAATACGTGAATTTGCATCTGTTCTATG	+	57288830	57288869	57288870	57289330	57288893	57288894	Pper_target_2300_genes_0_24149251
chr1	TTTTGGTTAACTATACAGGAATGCGTGTTACGACGCTGAG	+	57305667	57305706	57305707	57306167	57305723	57305724	Pper_target_2301_genes_0_24149252
chr1	AAATTCTTCAATAATACCAAACCCATCGAAATGAAATCAC	+	57309264	57309303	57309304	57309764	57309328	57309329	Pper_target_2302_genes_0_24149253
chr1	TTTTTTAATTTCTTTTTACTTATAGATGCAATCCTTAAAA	+	57350457	57350496	57350497	57350957	57350516	57350517	Pper_target_2303_genes_0_24149254
chr1	ACCTAATAATCATAAACAAAAGATGAATATATGTTAAAAA	-	57354627	57354666	57354167	57354627	57354613	57354614	Pper_target_2304_genes_0_24149255
chr1	GACCTAGAATCGAGGAACATGCCATGGATTGCTTGGGAAA	+	57357587	57357626	57357627	57358087	57357628	57357629	Pper_target_2305_genes_0_24149256
chr1	GAGATGAAGTGAAGTTCAGAAGAGCCAATATAAAAGAGAC	+	57360919	57360958	57360959	57361419	57360959	57360960	Pper_target_2306_genes_0_24149257
chr1	CTATCTCTCATATGTCCTATCATTGTATAATATAAACTCG	+	57375557	57375596	57375597	57376057	57375616	57375617	Pper_target_2307_genes_0_24149258
chr1	GGGCACAATCATCACTATTTTGATTGTAAACCCTAATCTG	-	57378660	57378699	57378200	57378660	57378651	57378652	Pper_target_2308_genes_0_24149259
chr1	ATGTTAACAAATTAATTTGGAGAAAAAAGGAGTGATGAGT	+	57403010	57403049	57403050	57403510	57403069	57403070	Pper_target_2309_genes_0_24149260
chr1	TAATGTTAGTAAAGTTATTTGAATCAGTTTTATTCGATGC	+	57421387	57421426	57421427	57421887	57421432	57421433	Pper_target_2312_genes_0_24149263
chr1	TTTTGCCACTGGTTCATCTTCAACCCCTGAATACTCTTTC	+	57424433	57424472	57424473	57424933	57424483	57424484	Pper_target_2313_genes_0_24149264
chr1	CCGCCATTGAAGATCGAAACACCAACGAGGCAACGATATG	+	57427449	57427488	57427489	57427949	57427499	57427500	Pper_target_2314_genes_0_24149265
chr1	AATTTGTAAGGTTATTTTGCAGAATCGCGTTTACCAGGAA	+	57431108	57431147	57431148	57431608	57431150	57431151	Pper_target_2315_genes_0_24149266
chr1	CGATATTCATAGAAGTAGAAGTGAGTATCTAGAGCCAGAG	+	57434654	57434693	57434694	57435154	57434714	57434715	Pper_target_2316_genes_0_24149267
chr1	AAAATGAAATTTTCAAAATGTTTGGTTGATTCAATTTTAA	+	57445650	57445689	57445690	57446150	57445707	57445708	Pper_target_2317_genes_0_24149268
chr1	TTTTTTCTTCTCTCTCTTTTCACTACTATAGTAGCGTTTC	+	57448649	57448688	57448689	57449149	57448708	57448709	Pper_target_2318_genes_0_24149269
chr1	AAAAAATACCAATTCATTCAAATTCATATGTTAATAGAAT	+	57461735	57461774	57461775	57462235	57461784	57461785	Pper_target_2319_genes_0_24149270
chr1	CTTCCTTACCACCTCCTCTTCATAGTTCTGAGGTTTAGTC	+	57466775	57466814	57466815	57467275	57466822	57466823	Pper_target_2320_genes_0_24149271
chr1	TGGGTCATATGCATCATTTCTTTTTGTCCGAACTGGTGAG	+	57469845	57469884	57469885	57470345	57469909	57469910	Pper_target_2321_genes_0_24149272
chr1	GAGTTGACTTTTTGATGGGCCCACACAAAGGTCCGACCCA	+	57477038	57477077	57477078	57477538	57477081	57477082	Pper_target_2322_genes_0_24149273
chr1	TGGCTAAAGGGGTGGACATCATAACACCAGTTGACCAAAG	+	57480118	57480157	57480158	57480618	57480167	57480168	Pper_target_2323_genes_0_24149274
chr1	CTGGCAGTGAGAGTAGCAGTAGTTGAGTTTCGACTAAGAG	+	57483562	57483601	57483602	57484062	57483616	57483617	Pper_target_2324_genes_0_24149275
chr1	ACACTTTGTTTATATTTAAATTCCAATTAAATTTGATTGG	+	57486677	57486716	57486717	57487177	57486728	57486729	Pper_target_2325_genes_0_24149276
chr1	CACCAATATTGGTACTCACTTGCCTCTTAGTTTACATGAT	+	57489905	57489944	57489945	57490405	57489960	57489961	Pper_target_2326_genes_0_24149277
chr1	GATATAAGTAAATTTATGTCATCTTTTTATTGGTTTAACG	+	57493030	57493069	57493070	57493530	57493081	57493082	Pper_target_2327_genes_0_24149278
chr1	GGTCTATGGTCCATAAGGAATGGGTGTTGTGGATGGCATT	+	57499657	57499696	57499697	57500157	57499718	57499719	Pper_target_2328_genes_0_24149279
chr1	TGGAATCACCTCCAACATATATCAGAACTAACCGATTTAC	-	57502724	57502763	57502264	57502724	57502721	57502722	Pper_target_2329_genes_0_24149280
chr1	CATAAGATGGTGGCCTTTGAAATTATATGTCGAGCCAATG	+	57534259	57534298	57534299	57534759	57534323	57534324	Pper_target_2330_genes_0_24149281
chr1	TCTTAACTCTCAAGTCTAAAATAACACATTTCATATACCG	+	57537768	57537807	57537808	57538268	57537827	57537829	Pper_target_2331_genes_0_24149282
chr1	AGAATGTGGGTACGTGTACGTGAACGAGACAACATGGAAC	+	57540817	57540856	57540857	57541317	57540858	57540859	Pper_target_2332_genes_0_24149283
chr1	TACAGGTGTTGAAATCCCAAAGTTTGTTGACAAAACTACC	+	57545765	57545804	57545805	57546265	57545812	57545813	Pper_target_2333_genes_0_24149284
chr1	CAAACACAACACCAATTATATTTTTAGCAGTGAATTTTTA	+	57549637	57549676	57549677	57550137	57549698	57549699	Pper_target_2334_genes_0_24149285
chr1	TGTGTTTATGGTACAAGGTATCAAGATCCATAAGAGTTTC	+	57553635	57553674	57553675	57554135	57553693	57553694	Pper_target_2335_genes_0_24149286
chr1	CTGTTTAAGCTCAAACAATAAATGTTAAGCGTGGAGCAAG	+	57710040	57710079	57710080	57710540	57710083	57710084	Pper_target_2336_genes_0_24149287
chr1	TCTTCGACTTCGAATAATTTCATTTTGGATAACAAATCAG	+	57713562	57713601	57713602	57714062	57713605	57713606	Pper_target_2337_genes_0_24149288
chr1	TTTTTTGAGTGTATGAGATAAATAGTTATTGTTTATGTAC	-	57716818	57716857	57716358	57716818	57716807	57716808	Pper_target_2338_genes_0_24149289
chr1	AATTTCTTCTTACTTATTTGACGGGTAAGTGTACATTGTG	+	57723244	57723283	57723284	57723744	57723302	57723303	Pper_target_2339_genes_0_24149290
chr1	AGCTCAAGCACGTCTTGGTGGAGGGAATGTGGAGATTGTT	+	57726290	57726329	57726330	57726790	57726347	57726348	Pper_target_2340_genes_0_24149291
chr1	TAATGATACTAGGTACTGTCAAAGGAAATTGTGTTAAGAG	+	57797516	57797555	57797556	57798016	57797569	57797570	Pper_target_2342_genes_0_24149293
chr1	GCATGCATTTACCATTCAGACAGTTGTTCATTCCAAAGAG	+	58180360	58180399	58180400	58180860	58180410	58180411	Pper_target_2344_genes_0_24149295
chr1	AGCTGTGACATATCCCTGTAACTTACTACCACTTCCTTAC	+	58397663	58397702	58397703	58398163	58397704	58397705	Pper_target_2346_genes_0_24149297
chr1	AGCGATAATGAAGGATTCCAGCTTCTAATGCGTTGATGAC	+	58400995	58401034	58401035	58401495	58401051	58401052	Pper_target_2347_genes_0_24149298
chr1	TGTGACCTTAGGTCTACTGTAATAAAACCTTGTAACATAC	+	58430397	58430436	58430437	58430897	58430438	58430439	Pper_target_2348_genes_0_24149299
chr1	TTTATTTGATTAAATACTTCTAAAGTTAAATACATAGTGG	+	58611983	58612022	58612023	58612483	58612064	58612065	Pper_target_2349_genes_0_24149300
chr1	GTTTAATCCTACGAAAGACGTGTCCATCCCAGAGATTTTA	+	58615199	58615238	58615239	58615699	58615258	58615259	Pper_target_2350_genes_0_24149301
chr1	GGCATGGGATATGGAAGTAGATGAAAAGTCAAATTTAGTG	+	58627413	58627452	58627453	58627913	58627459	58627460	Pper_target_2352_genes_0_24149303
chr1	AGTACAAAACCATACTTTTTATCTAGAAATTGGTCGGTCA	+	58725971	58726010	58726011	58726471	58726016	58726017	Pper_target_2353_genes_0_24149304
chr1	GCATCGATACCGCCAGAAACCTTCACACCCCACCGATCTA	+	58729757	58729796	58729797	58730257	58729805	58729806	Pper_target_2354_genes_0_24149305
chr1	TAAAATTCTAACTTTTAATGATATGATCTTATCAAAAAAA	+	58732840	58732879	58732880	58733340	58732899	58732900	Pper_target_2355_genes_0_24149306
[truncated: 39,550 more rows]

## Sheet: Table S4
Supplementary Table 4: Total sequenced and aligned pairs and sample mean coverage for each accession
Accession code	Sequenced Read Pairs	Aligned Read Pairs	% Aligned Pairs	Sample Mean Coverage
EVA_Lsa_00051	5784818	5394020	0.9324	113.72
EVA_Lsa_00052	7274344	6829486	0.9388	144.64
EVA_Lsa_00053	5780495	5402616	0.9346	113.83
EVA_Lsa_00054	5376800	5030621	0.9356	105.91
EVA_Lsa_00055	1192067	1115158	0.9355	22.85
EVA_Lsa_00056	5015253	4677234	0.9326	97.41
EVA_Lsa_00057	4593660	4286570	0.9331	88.36
EVA_Lsa_00058	3286665	3068592	0.9336	65.46
EVA_Lsa_00059	3935965	3210900	0.8158	57.53
EVA_Lsa_00060	3078262	2259116	0.7339	39.9
EVA_Lsa_00061	2879510	2407094	0.8359	43.17
EVA_Lsa_00063	1537665	1401124	0.9112	31.03
EVA_Lsa_00064	5743138	5262844	0.9164	112.59
EVA_Lsa_00065	3023111	2775807	0.9182	60.93
EVA_Lsa_00066	3142655	2880650	0.9166	63.36
EVA_Lsa_00067	3060715	2789876	0.9115	57.48
EVA_Lsa_00068	7748575	6770472	0.8738	121.78
EVA_Lsa_00069	789757	297916	0.3772	3.99
EVA_Lsa_00070	615097	217362	0.3534	2.88
EVA_Lsa_00071	306117	274750	0.8975	6.06
EVA_Lsa_00072	1246200	1142124	0.9165	24.18
EVA_Lsa_00073	1028618	936009	0.91	19.99
EVA_Lsa_00074	2114013	1920341	0.9084	41.2
EVA_Lsa_00075	5080949	4646324	0.9145	97.08
EVA_Lsa_00076	9165794	8026486	0.8757	141.97
EVA_Lsa_00077	2688869	2097003	0.7799	36.77
EVA_Lsa_00079	2474588	1953244	0.7893	34.83
EVA_Lsa_00080	3547384	3246358	0.9151	65.5
EVA_Lsa_00081	4679932	4278940	0.9143	87.2
EVA_Lsa_00084	3292340	3018020	0.9167	60.74
EVA_Lsa_00085	4410097	4042938	0.9167	81.57
EVA_Lsa_00086	4974904	4555940	0.9158	89.93
EVA_Lsa_00088	1882541	1515672	0.8051	26.3
EVA_Lsa_00091	7647744	6637436	0.8679	119.15
EVA_Lsa_00092	4740516	4088410	0.8624	73.25
EVA_Lsa_00094	4345220	3991085	0.9185	81.14
EVA_Lsa_00095	8315932	7626266	0.9171	156.87
EVA_Lsa_00096	4408392	4041990	0.9169	82.23
EVA_Lsa_00097	4083939	3725312	0.9122	76.36
EVA_Lsa_00098	5516690	5035670	0.9128	101.3
EVA_Lsa_00099	901767	539272	0.598	8.73
EVA_Lsa_00101	21168593	19110230	0.9028	351.9
EVA_Lsa_00102	21703197	19538749	0.9003	351.78
EVA_Lsa_00103	1869622	1713172	0.9163	35.13
EVA_Lsa_00104	4058651	3723604	0.9174	76.01
EVA_Lsa_00105	1450018	1327508	0.9155	27.46
EVA_Lsa_00106	3932494	3609749	0.9179	73.33
EVA_Lsa_00107	5351706	4900216	0.9156	102.2
EVA_Lsa_00108	1477240	984208	0.6662	17.44
EVA_Lsa_00110	1815902	996496	0.5488	16.1
EVA_Lsa_00111	8221210	6844963	0.8326	125.85
EVA_Lsa_00112	1160419	1059680	0.9132	21.5
EVA_Lsa_00113	1019878	929488	0.9114	19.36
EVA_Lsa_00114	3580340	3285462	0.9176	66.28
EVA_Lsa_00115	660669	598280	0.9056	12.77
EVA_Lsa_00116	431907	386214	0.8942	8.58
EVA_Lsa_00118	759386	307228	0.4046	4.32
EVA_Lsa_00120	2950597	2195206	0.744	39.35
EVA_Lsa_00121	4431628	3618262	0.8165	64.44
EVA_Lsa_00122	8515874	7844432	0.9212	160.37
EVA_Lsa_00123	4328394	3997375	0.9235	81.01
EVA_Lsa_00128	1671059	1522269	0.911	31.23
EVA_Lsa_00129	4752995	4366842	0.9188	91.27
EVA_Lsa_00132	5099957	4661644	0.9141	98.2
EVA_Lsa_00133	3069914	2443606	0.796	42.42
EVA_Lsa_00134	9773955	8501081	0.8698	150.15
EVA_Lsa_00136	3795981	3055780	0.805	53.82
EVA_Lsa_00137	3712926	3411408	0.9188	68.44
EVA_Lsa_00138	3538601	3250569	0.9186	64.92
EVA_Lsa_00139	3853092	3535832	0.9177	71.21
EVA_Lsa_00140	3000540	2753059	0.9175	56.34
EVA_Lsa_00141	968189	881554	0.9105	19.42
EVA_Lsa_00143	544443	285166	0.5238	4.37
EVA_Lsa_00144	1527006	1127502	0.7384	19.14
EVA_Lsa_00145	2343603	1870594	0.7982	32.75
EVA_Lsa_00146	2475493	2256494	0.9115	45.43
EVA_Lsa_00147	3640562	3321078	0.9122	66.59
EVA_Lsa_00148	548104	498421	0.9094	10.1
EVA_Lsa_00149	3202226	2934276	0.9163	62.11
EVA_Lsa_00150	373002	340184	0.912	7.41
EVA_Lsa_00151	1477468	1092930	0.7397	18.5
EVA_Lsa_00152	11473812	10248742	0.8932	185.78
EVA_Lsa_00153	6023558	5269996	0.8749	94.55
EVA_Lsa_00154	1941636	1767633	0.9104	36.9
EVA_Lsa_00155	6399359	5882276	0.9192	119.15
EVA_Lsa_00156	6938913	6363216	0.917	131.03
EVA_Lsa_00157	5606211	5128830	0.9148	104.83
EVA_Lsa_00158	5841849	5341556	0.9144	111.4
EVA_Lsa_00159	2433024	1785475	0.7339	30.31
EVA_Lsa_00160	10947329	9551035	0.8725	169.1
EVA_Lsa_00161	734130	388528	0.5292	5.88
EVA_Lsa_00163	895593	816274	0.9114	17.56
EVA_Lsa_00166	4804377	4396118	0.915	91.06
EVA_Lsa_00167	3939450	3633982	0.9225	76.88
EVA_Lsa_00169	711040	648439	0.912	13.54
EVA_Lsa_00170	1351554	1237106	0.9153	25.84
EVA_Lsa_00171	2350471	2196380	0.9344	47.66
EVA_Lsa_00173	6660307	6197869	0.9306	133.62
EVA_Lsa_00174	7271807	6778182	0.9321	147.84
EVA_Lsa_00175	6933539	6458294	0.9315	138.01
EVA_Lsa_00176	2248470	2105440	0.9364	45.03
EVA_Lsa_00177	6945959	6507070	0.9368	139.3
EVA_Lsa_00178	1481780	1381574	0.9324	29.24
EVA_Lsa_00179	5001276	4673254	0.9344	99.68
EVA_Lsa_00180	4791629	4478435	0.9346	96.8
EVA_Lsa_00181	3605954	3366304	0.9335	72.71
EVA_Lsa_00182	2661758	2482678	0.9327	53.15
EVA_Lsa_00183	2718862	2540557	0.9344	54.48
EVA_Lsa_00184	2355	1980	0.8408	0.04
EVA_Lsa_00185	2005955	1503322	0.7494	26.06
EVA_Lsa_00186	5273858	4909724	0.931	102.54
EVA_Lsa_00187	2499898	2327327	0.931	48.09
EVA_Lsa_00188	3432495	2713520	0.7905	47.54
EVA_Lsa_00189	3952587	3690948	0.9338	79.08
EVA_Lsa_00190	5100373	4764288	0.9341	100.42
EVA_Lsa_00191	4296040	3577740	0.8328	64.46
EVA_Lsa_00192	4297140	4022330	0.936	85.94
EVA_Lsa_00193	6747820	6241668	0.925	133.88
EVA_Lsa_00194	5682741	5272777	0.9279	112.74
EVA_Lsa_00195	2002061	1864399	0.9312	38.63
EVA_Lsa_00196	2507985	2343788	0.9345	52.51
EVA_Lsa_00197	4989319	4667195	0.9354	100.95
EVA_Lsa_00198	6099953	5663006	0.9284	122.18
EVA_Lsa_00199	5515936	5113759	0.9271	111.81
EVA_Lsa_00200	5208131	4826152	0.9267	105.19
EVA_Lsa_00201	6729784	6262857	0.9306	134.01
EVA_Lsa_00202	5939365	5555461	0.9354	118.85
EVA_Lsa_00203	4623164	4260718	0.9216	83.93
EVA_Lsa_00204	3663450	3420290	0.9336	74.18
EVA_Lsa_00205	5344911	4968086	0.9295	108.61
EVA_Lsa_00206	5138568	4793830	0.9329	104
EVA_Lsa_00207	3979241	3688228	0.9269	81.01
EVA_Lsa_00208	5197425	4770725	0.9179	97.19
EVA_Lsa_00209	4525497	4243760	0.9377	90.72
EVA_Lsa_00210	716532	649516	0.9065	12.59
EVA_Lsa_00211	6531578	6077420	0.9305	129.22
EVA_Lsa_00212	2099303	1966232	0.9366	42.2
EVA_Lsa_00213	5124651	4776262	0.932	103.61
EVA_Lsa_00214	6496522	6021953	0.927	134.49
EVA_Lsa_00215	5631194	5213592	0.9258	113.54
EVA_Lsa_00216	5957048	5536984	0.9295	119.27
EVA_Lsa_00217	3377470	3129365	0.9265	68.45
EVA_Lsa_00218	6891391	6384996	0.9265	140.09
EVA_Lsa_00219	5136126	4774241	0.9295	102.02
EVA_Lsa_00220	4528740	4219038	0.9316	90.69
EVA_Lsa_00222	5620938	5220210	0.9287	110.68
EVA_Lsa_00223	6414470	5978295	0.932	129.94
EVA_Lsa_00224	2649271	2463808	0.93	56.13
EVA_Lsa_00225	5273511	4906752	0.9305	108.98
EVA_Lsa_00226	1837259	1682550	0.9158	34.93
EVA_Lsa_00227	2955936	2757373	0.9328	58.42
EVA_Lsa_00228	3269267	3059533	0.9358	65.44
EVA_Lsa_C0001	5040818	4669100	0.9263	95.06
EVA_Lsa_C0002	7196481	6702248	0.9313	146.92
EVA_Lsa_C0003	3438671	3227230	0.9385	70
EVA_Lse_00017	2865244	2589986	0.9039	58.26
EVA_Lse_00026	2860345	2580792	0.9023	58.35
EVA_Lse_00033	2415915	2182994	0.9036	48.06
EVA_Lse_00035	3250800	2933290	0.9023	63.86
EVA_Lse_00049	4678748	4232176	0.9046	92.37

## Sheet: Table S5
Supplementary Table 5: Types of SNPs with potential effects on gene function
Type of variants	Number of variants
Impact MODIFIER
Upstream gene	0.27304
Downstream gene	0.16186
Intron	0.07853
5 prime UTR	0.00995
3 prime UTR	0.00922
intergenic_region	0.34674
non_coding_transcript_exon_variant	0.0015
Impact HIGH
Stop gained	0.00081
Splice acceptor	0.00011
Stop lost	0.00018
Splice donor	9e-05
Start lost	0.0001
Stop retained	6e-05
Impact MODERATE
Missense	0.04822
Impact LOW
Synonymous	0.06276
5 prime UTR premature start codon gain	0.00153
Splice region	0.00527

## Sheet: Table S6
Supplementary Table 6: Distribution of the 160 accessions according to Admixture model-based clustering (K=6). For each K, the allele frequency is reported.
Accession code		K1	K2	K3	K4	K5	K6
EVA_Lsa_00053	K1	0.99995	1e-05	1e-05	1e-05	1e-05	1e-05
EVA_Lsa_00054	K1	0.99995	1e-05	1e-05	1e-05	1e-05	1e-05
EVA_Lsa_00066	K1	0.99995	1e-05	1e-05	1e-05	1e-05	1e-05
EVA_Lsa_00072	K1	0.99995	1e-05	1e-05	1e-05	1e-05	1e-05
EVA_Lsa_00094	K1	0.99995	1e-05	1e-05	1e-05	1e-05	1e-05
EVA_Lsa_00103	K1	0.99995	1e-05	1e-05	1e-05	1e-05	1e-05
EVA_Lsa_00171	K1	0.99995	1e-05	1e-05	1e-05	1e-05	1e-05
EVA_Lsa_00206	K1	0.99995	1e-05	1e-05	1e-05	1e-05	1e-05
EVA_Lsa_00223	K1	0.99995	1e-05	1e-05	1e-05	1e-05	1e-05
EVA_Lsa_00226	K1	0.99995	1e-05	1e-05	1e-05	1e-05	1e-05
EVA_Lsa_00228	K1	0.99995	1e-05	1e-05	1e-05	1e-05	1e-05
EVA_Lsa_C0003	K1	0.99995	1e-05	1e-05	1e-05	1e-05	1e-05
EVA_Lsa_00225	K1	0.952319	1e-05	1e-05	1e-05	0.047641	1e-05
EVA_Lsa_00203	K1	0.938389	1e-05	0.061568	1.3e-05	1e-05	1e-05
EVA_Lsa_00227	K1	0.883024	0.05283	1e-05	0.064117	1e-05	1e-05
EVA_Lsa_00108	K1	0.792619	1e-05	0.207341	1e-05	1e-05	1e-05
EVA_Lsa_00207	K1	0.759658	1e-05	0.066707	0.173606	1e-05	1e-05
EVA_Lsa_00105	K1	0.676098	0.090086	0.042891	1e-05	1e-05	0.190905
EVA_Lsa_00213	K1	0.667574	0.055897	0.139937	0.067151	1e-05	0.069432
EVA_Lsa_00097	K1	0.571003	0.036221	0.244255	0.094723	0.032525	0.021273
EVA_Lsa_00085	K1	0.533357	1e-05	0.378112	0.06873	1e-05	0.01978
EVA_Lsa_00070	K2	1e-05	0.99995	1e-05	1e-05	1e-05	1e-05
EVA_Lsa_00074	K2	1e-05	0.99995	1e-05	1e-05	1e-05	1e-05
EVA_Lsa_00080	K2	1e-05	0.99995	1e-05	1e-05	1e-05	1e-05
EVA_Lsa_00128	K2	1e-05	0.99995	1e-05	1e-05	1e-05	1e-05
EVA_Lsa_00136	K2	1e-05	0.99995	1e-05	1e-05	1e-05	1e-05
EVA_Lsa_00147	K2	1e-05	0.99995	1e-05	1e-05	1e-05	1e-05
EVA_Lsa_00169	K2	1e-05	0.99995	1e-05	1e-05	1e-05	1e-05
EVA_Lsa_00178	K2	1e-05	0.99995	1e-05	1e-05	1e-05	1e-05
EVA_Lsa_00187	K2	1e-05	0.99995	1e-05	1e-05	1e-05	1e-05
EVA_Lsa_00188	K2	1e-05	0.99995	1e-05	1e-05	1e-05	1e-05
EVA_Lsa_00189	K2	1e-05	0.99995	1e-05	1e-05	1e-05	1e-05
EVA_Lsa_00200	K2	1e-05	0.99995	1e-05	1e-05	1e-05	1e-05
EVA_Lsa_00204	K2	1e-05	0.99995	1e-05	1e-05	1e-05	1e-05
EVA_Lsa_00208	K2	1e-05	0.99995	1e-05	1e-05	1e-05	1e-05
EVA_Lsa_00057	K2	1.6e-05	0.999937	1.8e-05	1e-05	1e-05	1e-05
EVA_Lsa_00220	K2	1e-05	0.964117	1e-05	1e-05	1e-05	0.035843
EVA_Lsa_00076	K2	1e-05	0.944822	0.055138	1e-05	1e-05	1e-05
EVA_Lsa_00173	K2	0.064774	0.935186	1e-05	1e-05	1e-05	1e-05
EVA_Lsa_00079	K2	1e-05	0.895268	0.01657	1e-05	1e-05	0.088132
EVA_Lsa_00092	K2	1e-05	0.842391	0.003648	1e-05	1e-05	0.153931
EVA_Lsa_00081	K2	1e-05	0.834264	1e-05	1e-05	1e-05	0.165696
EVA_Lsa_00148	K2	1e-05	0.827701	0.039092	1e-05	1e-05	0.133177
EVA_Lsa_00219	K2	1e-05	0.800178	1e-05	1e-05	0.045594	0.154197
EVA_Lsa_00095	K2	1e-05	0.798275	1e-05	1e-05	1e-05	0.201685
EVA_Lsa_00101	K2	1e-05	0.763527	0.120469	1e-05	1e-05	0.115974
EVA_Lsa_00182	K2	1e-05	0.756965	0.052928	0.029016	1e-05	0.161071
EVA_Lsa_00132	K2	1e-05	0.755246	1e-05	1e-05	1e-05	0.244714
EVA_Lsa_00156	K2	0.009005	0.687928	0.021926	0.080155	1e-05	0.200977
EVA_Lsa_00107	K2	1e-05	0.679462	0.023744	1e-05	1e-05	0.296764
EVA_Lsa_00129	K2	1e-05	0.673665	1e-05	0.128346	1e-05	0.197958
EVA_Lsa_00139	K2	1e-05	0.643028	0.134335	1e-05	1e-05	0.222608
EVA_Lsa_00071	K2	0.051624	0.54222	1e-05	0.143972	0.006581	0.255593
EVA_Lsa_00222	K2	0.002814	0.521468	1e-05	0.132027	1e-05	0.34367
EVA_Lsa_00181	K2	1e-05	0.517052	0.004982	0.170833	1e-05	0.307113
EVA_Lsa_00055	K3	1e-05	1e-05	0.99995	1e-05	1e-05	1e-05
EVA_Lsa_00065	K3	1e-05	1e-05	0.99995	1e-05	1e-05	1e-05
EVA_Lsa_00114	K3	1e-05	1e-05	0.99995	1e-05	1e-05	1e-05
EVA_Lsa_00116	K3	1e-05	1e-05	0.99995	1e-05	1e-05	1e-05
EVA_Lsa_00123	K3	1e-05	1e-05	0.99995	1e-05	1e-05	1e-05
EVA_Lsa_00159	K3	1e-05	1e-05	0.99995	1e-05	1e-05	1e-05
EVA_Lsa_00167	K3	1e-05	1e-05	0.99995	1e-05	1e-05	1e-05
EVA_Lsa_00177	K3	1e-05	1e-05	0.99995	1e-05	1e-05	1e-05
EVA_Lsa_00179	K3	1e-05	1e-05	0.99995	1e-05	1e-05	1e-05
EVA_Lsa_00192	K3	1e-05	1e-05	0.99995	1e-05	1e-05	1e-05
EVA_Lsa_00196	K3	1e-05	1e-05	0.99995	1e-05	1e-05	1e-05
EVA_Lsa_00197	K3	1e-05	1e-05	0.99995	1e-05	1e-05	1e-05
EVA_Lsa_00153	K3	1e-05	1e-05	0.999947	1.3e-05	1e-05	1e-05
EVA_Lsa_00224	K3	1e-05	1e-05	0.897945	0.102015	1e-05	1e-05
EVA_Lsa_00121	K3	1e-05	1e-05	0.870896	1e-05	1e-05	0.129064
EVA_Lsa_00161	K3	0.138616	1e-05	0.861344	1e-05	1e-05	1e-05
EVA_Lsa_00151	K3	0.030084	1e-05	0.763875	1e-05	1e-05	0.20601
EVA_Lsa_C0001	K3	0.104361	1.5e-05	0.75917	1e-05	1e-05	0.136434
EVA_Lsa_00202	K3	1e-05	0.253734	0.746226	1e-05	1e-05	1e-05
EVA_Lsa_00143	K3	0.167598	1e-05	0.711837	1e-05	1e-05	0.120535
EVA_Lsa_00118	K3	0.085622	1e-05	0.70969	1e-05	1e-05	0.204658
EVA_Lsa_00122	K3	0.044093	0.005348	0.688697	0.217215	1e-05	0.044637
EVA_Lsa_00176	K3	0.004882	0.059536	0.680052	0.136074	1e-05	0.119446
EVA_Lsa_00115	K3	1e-05	0.009726	0.598198	0.387269	1e-05	0.004787
EVA_Lsa_00060	K4	1e-05	1e-05	1e-05	0.99995	1e-05	1e-05
EVA_Lsa_00064	K4	1e-05	1e-05	1e-05	0.99995	1e-05	1e-05
EVA_Lsa_00068	K4	1e-05	1e-05	1e-05	0.99995	1e-05	1e-05
EVA_Lsa_00170	K4	1e-05	1e-05	1e-05	0.99995	1e-05	1e-05
EVA_Lsa_00175	K4	1e-05	1e-05	1e-05	0.99995	1e-05	1e-05
EVA_Lsa_00191	K4	1e-05	1e-05	1e-05	0.99995	1e-05	1e-05
EVA_Lsa_00193	K4	1e-05	1e-05	1e-05	0.99995	1e-05	1e-05
EVA_Lsa_00158	K4	1e-05	0.036723	0.217634	0.69694	0.048684	1e-05
EVA_Lsa_00059	K4	1e-05	1e-05	0.343019	0.615685	1e-05	0.041266
EVA_Lsa_00058	K4	0.033074	0.166192	0.040648	0.596198	1e-05	0.163879
EVA_Lsa_00051	K4	1e-05	0.010546	0.294611	0.573951	0.046433	0.074449
EVA_Lsa_00194	K4	0.124247	0.112812	0.117521	0.509587	1e-05	0.135822
EVA_Lse_00017	K5	1e-05	1e-05	1e-05	1e-05	0.99995	1e-05
EVA_Lse_00026	K5	1e-05	1e-05	1e-05	1e-05	0.99995	1e-05
EVA_Lse_00033	K5	1e-05	1e-05	1e-05	1e-05	0.99995	1e-05
EVA_Lse_00035	K5	1e-05	1e-05	1e-05	1e-05	0.99995	1e-05
EVA_Lse_00049	K5	1e-05	1e-05	1e-05	1e-05	0.99995	1e-05
EVA_Lsa_00077	K6	1e-05	1e-05	1e-05	1e-05	1e-05	0.99995
EVA_Lsa_00086	K6	1e-05	1e-05	1e-05	1e-05	1e-05	0.99995
EVA_Lsa_00096	K6	1e-05	1e-05	1e-05	1e-05	1e-05	0.99995
EVA_Lsa_00111	K6	1e-05	1e-05	1e-05	1e-05	1e-05	0.99995
EVA_Lsa_00152	K6	1e-05	1e-05	1e-05	1e-05	1e-05	0.99995
EVA_Lsa_00201	K6	1e-05	1e-05	1e-05	1e-05	1e-05	0.99995
EVA_Lsa_00214	K6	1e-05	1e-05	1e-05	1e-05	1e-05	0.99995
EVA_Lsa_00216	K6	1e-05	1e-05	1e-05	1e-05	1e-05	0.99995
EVA_Lsa_00218	K6	1e-05	1e-05	1e-05	1e-05	1e-05	0.99995
EVA_Lsa_00056	K6	1e-05	0.018441	1e-05	1e-05	1e-05	0.981519
EVA_Lsa_00186	K6	1e-05	0.059647	1e-05	1e-05	1e-05	0.940313
EVA_Lsa_00146	K6	1e-05	0.08551	1e-05	1e-05	1e-05	0.91445
EVA_Lsa_00199	K6	1e-05	0.13962	1e-05	1e-05	1e-05	0.86034
EVA_Lsa_00134	K6	1e-05	1e-05	0.141583	1e-05	1e-05	0.858377
EVA_Lsa_00149	K6	1e-05	0.158788	1e-05	1e-05	1e-05	0.841172
EVA_Lsa_00140	K6	0.066667	1e-05	0.101092	0.046933	1e-05	0.785287
EVA_Lsa_00145	K6	1e-05	1e-05	0.216875	1e-05	1e-05	0.783085
EVA_Lsa_00144	K6	0.14381	1e-05	0.022223	0.053617	1e-05	0.78033
EVA_Lsa_00104	K6	0.002127	0.098332	0.144021	1e-05	1e-05	0.7555
EVA_Lsa_00195	K6	1e-05	0.256517	1e-05	1e-05	1e-05	0.743443
EVA_Lsa_00099	K6	0.05455	0.150473	0.081114	1e-05	1e-05	0.713843
EVA_Lsa_00185	K6	0.138222	0.089446	0.085312	1e-05	1e-05	0.687
EVA_Lsa_00069	K6	1e-05	0.243873	0.030365	0.072027	1e-05	0.653715
EVA_Lsa_00075	K6	1e-05	0.133101	0.101543	0.135702	1e-05	0.629635
EVA_Lsa_00052	K6	1e-05	1e-05	0.379295	1e-05	1e-05	0.620665
EVA_Lsa_00205	K6	0.045667	0.246205	1e-05	0.149973	1e-05	0.558135
EVA_Lsa_00061	K6	0.042221	1e-05	0.424487	1e-05	1e-05	0.533262
EVA_Lsa_00160	K6	0.037306	0.221535	0.057936	0.154627	1e-05	0.528586
EVA_Lsa_00138	K6	0.088621	0.113635	0.134108	0.136319	1e-05	0.527307
EVA_Lsa_00190	K6	0.082998	0.112736	0.128409	0.149962	1e-05	0.525885
EVA_Lsa_00073	K6	0.042299	0.26318	0.009093	0.164084	1e-05	0.521333
EVA_Lsa_00141	K6	1e-05	0.487364	1e-05	1.2e-05	1e-05	0.512594
EVA_Lsa_00154	Admixed	0.025781	0.226017	0.115033	0.1615	1e-05	0.47166
EVA_Lsa_00063	Admixed	1e-05	0.222627	0.047894	0.277099	1e-05	0.45236
EVA_Lsa_00133	Admixed	1.6e-05	0.385354	0.041189	0.160132	1e-05	0.4133
EVA_Lsa_00110	Admixed	0.078229	0.077611	0.439219	1e-05	1e-05	0.404921
EVA_Lsa_00217	Admixed	1e-05	0.315582	1e-05	0.330085	1e-05	0.354304
EVA_Lsa_00102	Admixed	1e-05	0.475426	0.141301	0.009836	0.02723	0.346197
EVA_Lsa_00215	Admixed	1e-05	0.462955	1e-05	0.195985	1e-05	0.34103
EVA_Lsa_00120	Admixed	0.005222	0.292998	0.15033	0.23879	1e-05	0.312649
EVA_Lsa_00198	Admixed	1e-05	0.465781	0.08997	0.154184	1e-05	0.290045
EVA_Lsa_00211	Admixed	0.06453	0.244586	0.038253	0.364039	1e-05	0.288582
EVA_Lsa_00183	Admixed	1e-05	0.476296	0.036938	0.198471	1e-05	0.288275
EVA_Lsa_00137	Admixed	0.422541	0.257197	0.089461	1e-05	1e-05	0.230781
EVA_Lsa_00212	Admixed	0.21052	0.173072	0.047941	0.33643	0.012732	0.219305
EVA_Lsa_00174	Admixed	1e-05	0.195178	0.207043	0.389926	1e-05	0.207833
EVA_Lsa_00150	Admixed	1e-05	0.329837	0.413327	0.056228	1e-05	0.200588
EVA_Lsa_00163	Admixed	0.204114	0.198511	0.010363	0.388427	1e-05	0.198574
EVA_Lsa_00112	Admixed	0.291211	0.020312	0.219624	0.272352	1e-05	0.196492
EVA_Lsa_00155	Admixed	1e-05	0.378824	0.370879	0.063562	1e-05	0.186715
EVA_Lsa_00113	Admixed	0.29974	0.016719	0.21571	0.283023	1e-05	0.184798
EVA_Lsa_00184	Admixed	0.220071	0.157507	0.445572	1e-05	1e-05	0.17683
EVA_Lsa_00088	Admixed	0.250062	0.027918	0.10394	0.446241	0.02998	0.141859
EVA_Lsa_00180	Admixed	1e-05	0.108945	0.293838	0.454492	0.003838	0.138876
EVA_Lsa_00084	Admixed	0.416207	1e-05	0.297156	0.157354	0.012936	0.116336
EVA_Lsa_00209	Admixed	0.450112	1e-05	0.41221	0.097035	1e-05	0.040623
EVA_Lsa_00166	Admixed	0.226562	1e-05	0.351815	0.381637	1e-05	0.039966
EVA_Lsa_00210	Admixed	0.423226	1e-05	0.476656	0.069686	0.007598	0.022825
EVA_Lsa_00106	Admixed	0.230918	1e-05	0.494296	0.266403	1e-05	0.008363
EVA_Lsa_C0002	Admixed	0.03472	0.035215	0.457379	0.469923	1e-05	0.002753
EVA_Lsa_00098	Admixed	0.352467	1e-05	0.088948	0.458328	0.100237	1e-05
EVA_Lsa_00067	Admixed	0.361631	1e-05	0.07788	0.464623	0.095846	1e-05
EVA_Lsa_00157	Admixed	0.397615	0.018406	0.19277	0.3441	0.0471	1e-05
EVA_Lsa_00091	Admixed	0.248492	1e-05	0.46861	0.282868	1e-05	1e-05

## Sheet: Table S7
Supplementary Table 7: Significant SNPs marker–trait associations identified using different GWAS models for four horticultural traits in a population of 155 lettuce accessions
Trait/Model	Chromosome	GLM	MLM	MLMM	CMLM	BLINK	FarmCPU
Seed Colour	Chr 2						1
	Chr 4	1
	Chr 5					1	1
	Chr 7	104	12	1	8	1	2
	Chr 8						1
Leaf Anthocyanin Content	Chr 1			1			2
	Chr 2						1
	Chr 4	1
	Chr 5	12		1	6	2	1
	Chr 8						1
	Chr 9	28	13	1	43	2	2
Outer Leaf Colour	Chr 2			2		2
	Chr 3						1
	Chr 4			2
	Chr 5	11			2	2
	Chr 7	2					1
	Chr 8					1
	Chr 9	12	1	2	1	2	1
Bolting time	Chr 2						1
	Chr 7	8					2
